# Supplementary material for: Alkoxy-functionalised dihydropyrimido[4,5-b]quinolinones enabling anti-proliferative and anti-invasive agents
Source: Royal Society of Chemistry journal article supplement (doi:10.1039/d4cc01219d), 2024-01-01
Supplement: d4cc01219d1.pdf [file d4cc01219d1.pdf]

## Supporting Information

### Alkoxy-functionalised dihydropyrimido[4,5-*b*]quinolinones enabling anti-proliferative and anti-invasive Agents

Subham G. Patel <sup>a,c,1</sup>, Ira Sharma <sup>b,1</sup>, Mehul P. Parmar <sup>a</sup>, Joaquina Nogales <sup>b</sup>, Chirag D. Patel <sup>a</sup>, Savan S. Bhalodiya <sup>a</sup>, Disha P. Vala <sup>a</sup>, Niraj V. Shah <sup>c</sup>, Sourav Banerjee <sup>b\*</sup>, and Hitendra M. Patel <sup>a\*</sup>

<sup>a</sup> Department of Chemistry, Sardar Patel University, Vallabh Vidyanagar, 388120, Gujarat, India

<sup>b</sup> Department of Cellular and Systems Medicine, School of Medicine, University of Dundee, Dundee, UK

<sup>c</sup> J & J College of Science, Nadiad – 387001, Kheda, Gujarat, India

<sup>1</sup> authors contributed equally

\* Co-corresponding Authors: Hitendra M. Patel, E-mail: [hm\\_patel@spuvvn.edu](mailto:hm_patel@spuvvn.edu).

Sourav Banerjee, E-mail: [s.y.banerjee@dundee.ac.uk](mailto:s.y.banerjee@dundee.ac.uk).

#### Table of Contents

| Sr. No. | Contents                                                                                                                           | Page No. |
|---------|------------------------------------------------------------------------------------------------------------------------------------|----------|
| 1       | Multicomponent reaction of aryl aldehyde, heteroaromatic amine and lawsone. (Comparison with previous studies)                     | S2       |
| 2       | Optimization of solvent for the reaction                                                                                           | S3       |
| 3       | Optimization of time and microwave irradiation power for the reaction                                                              | S3       |
| 4       | Experimental Section                                                                                                               | S4-S11   |
| 5       | <sup>1</sup> H-NMR, <sup>13</sup> C{ <sup>1</sup> H}-NMR, <sup>13</sup> C-DEPT135, HSQC & HMBC spectrum of <b>5a</b> & <b>6e</b> . | S12-S18  |
| 6       | <sup>1</sup> H-NMR, <sup>13</sup> C{ <sup>1</sup> H}-NMR Spectral data of all Compounds <b>5b-j</b> and <b>6a-j</b> .              | S19-S37  |
| 7       | LCMS Spectral data of all Compounds <b>5a-j</b> and <b>6a-j</b> .                                                                  | S38-S42  |
| 8       | HRMS Spectral data of all Compounds <b>5a-j</b> and <b>6a-j</b> .                                                                  | S43-S52  |
| 9       | Effect of <b>5c</b> and <b>5h</b> compounds on proliferation and invasion in GBM cells                                             | S53      |
| 10      | Abbreviations                                                                                                                      | S54      |
| 11      | Acknowledgements                                                                                                                   | S54      |
| 12      | Reference                                                                                                                          | S54      |

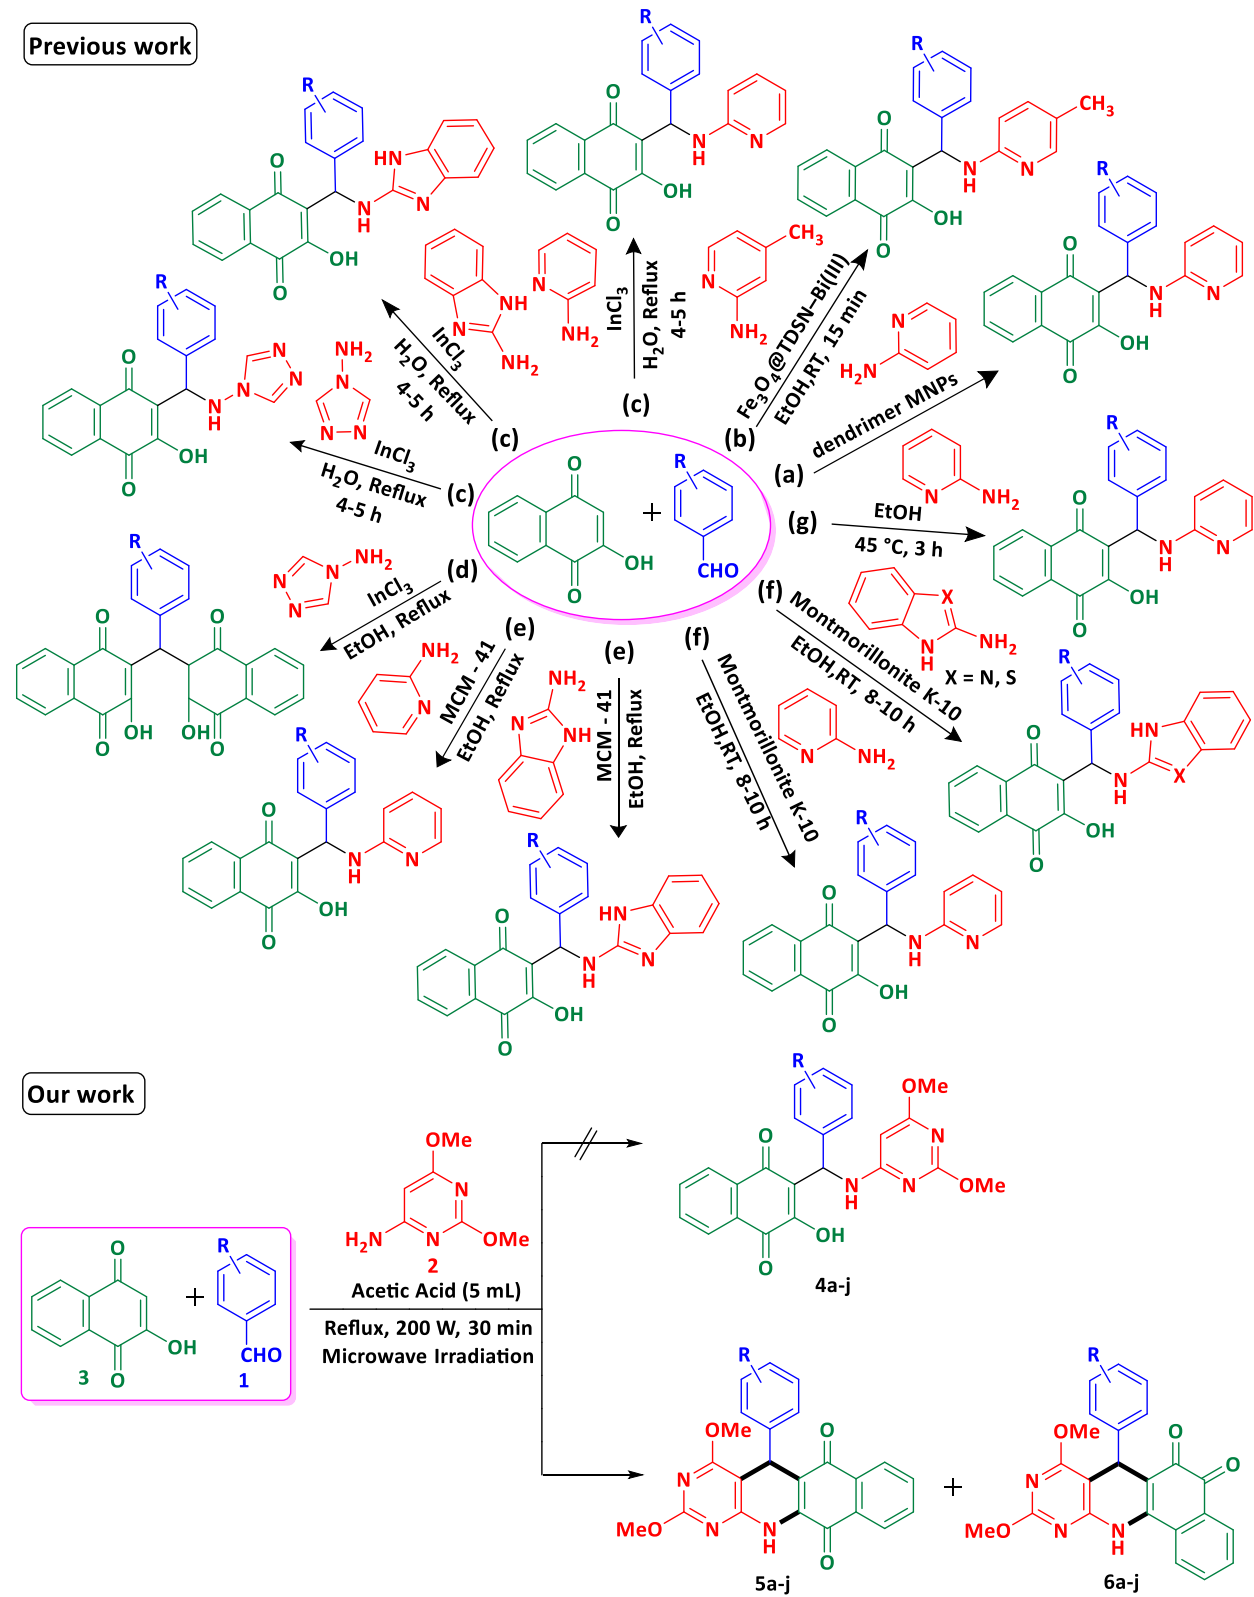

**Scheme S1** Multicomponent reaction of aryl aldehyde, heteroaromatic amine and lawsone.

**Table S1.** Optimization of solvent for the reaction.<sup>a</sup>

| Entry | Solvent <sup>b</sup> | Temperature   | Time         | Conversion relative to aldehyde <sup>c</sup> |
|-------|----------------------|---------------|--------------|----------------------------------------------|
| 1     | Solvent-free         | 100 °C        | 12 h         | NR                                           |
| 2     | Water                | reflux        | 12 h         | Incomplete                                   |
| 3     | Ethanol              | reflux        | 6 h          | Full                                         |
| 4     | Methanol             | reflux        | 8 h          | Full                                         |
| 5     | <b>Acetic acid</b>   | <b>reflux</b> | <b>1.5 h</b> | <b>Full</b>                                  |
| 6     | Ethyl L-lactate      | reflux        | 3 h          | Full                                         |
| 7     | Acetonitrile         | reflux        | 6 h          | Incomplete                                   |
| 8     | DMF                  | reflux        | 4 h          | Incomplete                                   |

<sup>a</sup> Reaction condition: 1 mmol *p*-methoxybenzaldehyde **1a**, 1 mmol 6-amino-2,4-dimethoxypyrimidine **2** and 1 mmol lawsone **3**, reflux

<sup>b</sup> 5 mL solvent

<sup>c</sup> Observed from TLC analysis

**Table S2** Optimization of time and microwave irradiation power for the reaction.<sup>a</sup>

| Entry    | Power (w)  | Time (min) | % Yield <sup>b</sup> |
|----------|------------|------------|----------------------|
| 1        | 300        | 45         | 88                   |
| 2        | 250        | 40         | 91                   |
| 3        | 200        | 40         | 94                   |
| <b>4</b> | <b>200</b> | <b>30</b>  | <b>94</b>            |
| 5        | 150        | 45         | 86                   |

<sup>a</sup> Reaction condition: 1 mmol *p*-methoxybenzaldehyde **1a**, 1 mmol 6-amino-2,4-dimethoxypyrimidine **2** and 1 mmol lawsone **3**, reflux, 5 mL glacial acetic acid, reflux

<sup>b</sup> Crude product yield.

## 1. Experimental section

### 1.1. General methods:

For synthesis, all chemical reagents were purchased from the TCI, Sigma - Aldrich and Sisco Research Laboratories Pvt. Ltd. and used without further purification. The microwave-assisted reactions were performed in a "SINEO UWave-1000 Microwave, UV, US Synthesis Extraction Reactor". The progress of all chemical reactions was monitored by thin-layer chromatography (TLC, on aluminium plates pre-coated with F254 silica gel 60). Melting points of all solid compounds were determined by the open capillary tube method and are uncorrected. The LCMS analysis was collected on an MS–Agilent 6120 quadrupole. HRMS was determined on Waters Micro mass Q-ToF Micro 4000 quadrupole spectrometer. Nuclear magnetic resonance spectra ( $^1\text{H}$  NMR &  $^{13}\text{C}$  NMR) were recorded on a Bruker 400 MHz WB FT-NMR spectrometer having proton noise decoupling mode with a standard 5mm probe using DMSO- $d_6$  solution. Abbreviations are used for the  $^1\text{H}$  NMR signal are as follows: s = singlet, d = doublet, t = triplet, q = quartet, dd = doublet of doublets, td = triplet of doublets, qd = quartet of doublets, qt = quartet of triplet, s m = multiplet. The chemical shifts are reported in parts per million and coupling constants ( $J$ ) are provided in Hertz.

### 1.2. General procedure for synthesis of alkoxy-functionalised DHPQs 5a-j and 6a-j.

A mixture of aromatic aldehydes (**1**, 1 mmol), 6-amino-2,4-dimethoxypyrimidine (**2**, 1 mmol), lawsone (**3**, 1 mmol) and acetic acid (5 mL) were charged into a microwave vessel. The reaction mixture was heated at 110 °C (200 W) by MW irradiation for 30 min. The reaction progress was monitored on TLC using n-hexane:ethyl acetate (50:50, v/v) as mobile phase. After complete consumption of starting material, the reaction mixture was cooled to room temperature and poured into 20 mL cold water for complete solidification. The obtained crude product was filtered and dried in an oven. Further isolation and purification, the crude product was separated by flash chromatography using 50% ethyl acetate and 50% n-hexane as a mobile phase.

#### 1.2.1. 2,4-dimethoxy-5-(4-methoxyphenyl)-5,12-dihydrobenzo[*g*]pyrimido[4,5-*b*]quinoline-6,11-dione (**5a**)

Orange solid, mp. 228 – 230 °C;  $^1\text{H}$ -NMR (500 MHz, DMSO- $d_6$ ) ( $\delta$ , ppm): 9.89 (s, 1H, NH), 8.02 (dd,  $J$  = 7.0, 2.0 Hz, 1H, Ar-H), 7.90 (dd,  $J$  = 7.5, 2.0 Hz, 1H, Ar-H), 7.80 (pd,  $J$  = 16, 7.5, 1.5 Hz, 2H, Ar-H), 7.15 (d,  $J$  = 8.5 Hz, 2H, Ar-H), 6.78 (d,  $J$  = 9.0 Hz, 2H, Ar-H), 5.25 (s, 1H, CH), 3.88 (s, 3H, OCH<sub>3</sub>), 3.86 (s, 3H, OCH<sub>3</sub>), 3.65 (s, 3H, OCH<sub>3</sub>);  $^{13}\text{C}$ -NMR (125 MHz, DMSO- $d_6$ ) ( $\delta$ , ppm): 181.4 (C=O), 180.0 (C=O), 168.0, 163.2, 157.8, 155.7, 139.1, 137.1, 134.7, 133.2, 131.7, 130.2, 128.6, 125.8, 125.5, 118.2, 113.6, 94.2, 54.9 (OCH<sub>3</sub>), 54.3 (OCH<sub>3</sub>), 54.0 (OCH<sub>3</sub>), 33.6 (C<sub>chiral</sub>); HRMS(ES<sup>+</sup>): 430.1097 [M + H]<sup>+</sup>.

**1.2.2. 8,10-dimethoxy-7-(4-methoxyphenyl)-7,12-dihydrobenzo[*h*]pyrimido[4,5-*b*]quinoline-5,6-dione (6a)**

Brownish orange solid, mp. 220 – 222 °C; <sup>1</sup>H-NMR (400 MHz, DMSO-*d*<sub>6</sub>) (δ, ppm): 10.78 (s, 1H, NH), 8.52 (d, *J* = 8.0 Hz, 1H, Ar-H), 7.98 (d, *J* = 7.3 Hz, 1H, Ar-H), 7.83 (t, *J* = 7.5 Hz, 1H, Ar-H), 7.67 (t, *J* = 7.6 Hz, 1H, Ar-H), 7.14 (d, *J* = 8.6 Hz, 2H, Ar-H), 6.77 (d, *J* = 8.6 Hz, 2H, Ar-H), 5.16 (s, 1H, CH), 3.93 (s, 3H, OCH<sub>3</sub>), 3.89 (s, 3H, OCH<sub>3</sub>), 3.65 (s, 3H, OCH<sub>3</sub>); <sup>13</sup>C-NMR (100 MHz, DMSO-*d*<sub>6</sub>) (δ, ppm): 179.2 (C=O), 176.4 (C=O), 168.7, 163.8, 159.5, 156.7, 146.8, 146.4, 135.3, 131.7, 131.1, 130.2, 129.9, 129.1, 125.3, 120.0, 114.3, 113.8, 111.8, 95.7, 55.4 (OCH<sub>3</sub>), 55.1 (OCH<sub>3</sub>), 54.7 (OCH<sub>3</sub>), 34.2 (C<sub>chiral</sub>); HRMS(ES<sup>+</sup>): 430.1097 [M + H]<sup>+</sup>.

**1.2.3. 2,4-dimethoxy-5-(3-methoxyphenyl)-5,12-dihydrobenzo[*g*]pyrimido[4,5-*b*]quinoline-6,11-dione (5b)**

Orange solid, mp. 230 – 232 °C; <sup>1</sup>H-NMR (400 MHz, DMSO-*d*<sub>6</sub>) (δ, ppm): 9.99 (s, 1H, NH), 8.06 – 8.02 (m, 1H, Ar-H), 7.94 – 7.90 (m, 1H, Ar-H), 7.86 – 7.78 (m, 2H, Ar-H), 7.14 (t, *J* = 8.2 Hz, 1H, Ar-H), 6.83 – 6.79 (m, 2H, Ar-H), 6.74 – 6.70 (m, 1H, Ar-H), 5.31 (s, 1H, CH), 3.89 (s, 3H, OCH<sub>3</sub>), 3.88 (s, 3H, OCH<sub>3</sub>), 3.68 (s, 3H, OCH<sub>3</sub>); <sup>13</sup>C-NMR (100 MHz, DMSO-*d*<sub>6</sub>) (δ, ppm): 182.0 (C=O), 179.5 (C=O), 168.7, 163.8, 159.6, 156.4, 146.7, 140.1, 135.2, 133.8, 132.2, 130.9, 130.0, 126.5, 126.2, 120.3, 118.3, 114.4, 112.0, 94.5, 55.4 (OCH<sub>3</sub>), 54.9 (OCH<sub>3</sub>), 54.6 (OCH<sub>3</sub>), 35.0 (C<sub>chiral</sub>); HRMS(ES<sup>+</sup>): 430.1097 [M + H]<sup>+</sup>.

**1.2.4. 8,10-dimethoxy-7-(3-methoxyphenyl)-7,12-dihydrobenzo[*h*]pyrimido[4,5-*b*]quinoline-5,6-dione (6b)**

Brownish orange solid, mp. 222 – 224 °C; <sup>1</sup>H-NMR (400 MHz, DMSO-*d*<sub>6</sub>) (δ, ppm): δ 9.97 (s, 1H, NH), 8.07 – 8.01 (m, 1H, Ar-H), 7.92 (dd, *J* = 7.2, 1.9 Hz, 1H, Ar-H), 7.83 (qd, *J* = 7.0, 1.8 Hz, 2H, Ar-H), 7.18 – 7.11 (m, 1H, Ar-H), 6.85 – 6.69 (m, 2H, Ar-H), 5.31 (s, 1H, CH), 3.89 (s, 3H, OCH<sub>3</sub>), 3.88 (s, 3H, OCH<sub>3</sub>), 3.68 (s, 3H, OCH<sub>3</sub>); <sup>13</sup>C-NMR (100 MHz, DMSO-*d*<sub>6</sub>) (δ, ppm): 178.7 (C=O), 175.9 (C=O), 168.2, 163.3, 159.0, 156.2, 146.3, 145.9, 134.8, 131.2, 130.6, 129.7, 129.4, 128.7, 124.8, 119.6, 113.8, 113.3, 111.3, 95.2, 54.9 (OCH<sub>3</sub>), 54.6 (OCH<sub>3</sub>), 54.2 (OCH<sub>3</sub>), 33.8 (C<sub>chiral</sub>); HRMS(ES<sup>+</sup>): 430.1097 [M + H]<sup>+</sup>.

**1.2.5. 5-(2,4-dimethoxyphenyl)-2,4-dimethoxy-5,12-dihydrobenzo[*g*]pyrimido[4,5-*b*]quinoline-6,11-dione (5c)**

Orange solid, mp. 232 – 234 °C; <sup>1</sup>H-NMR (400 MHz, DMSO-*d*<sub>6</sub>) (δ, ppm): 9.76 (s, 1H, NH), 8.05 – 7.98 (m, 1H, Ar-H), 7.89 – 7.75 (m, 4H, Ar-H), 7.21 – 7.14 (m, 1H, Ar-H), 6.44 – 6.37 (m, 2H, Ar-H), 5.39 (s, 1H, CH), 3.86 (s, 3H, OCH<sub>3</sub>), 3.79 (s, 3H, OCH<sub>3</sub>), 3.68 (s, 3H, OCH<sub>3</sub>), 3.65 (s, 3H, OCH<sub>3</sub>); <sup>13</sup>C-NMR (100 MHz, DMSO-*d*<sub>6</sub>) (δ, ppm): 181.8 (C=O), 179.8 (C=O), 168.4, 163.4, 159.9, 158.9, 156.7, 140.2, 135.2, 133.6, 132.4, 131.6, 130.6, 126.3, 126.0, 125.6, 117.9, 105.2, 99.3, 94.2, 56.0 (OCH<sub>3</sub>), 55.5 (OCH<sub>3</sub>), 54.8 (OCH<sub>3</sub>), 54.4 (OCH<sub>3</sub>), 32.0 (C<sub>chiral</sub>); HRMS(ES<sup>+</sup>): 460.1247 [M + H]<sup>+</sup>.

**1.2.6. 7-(2,4-dimethoxyphenyl)-8,10-dimethoxy-7,12-dihydrobenzo[*h*]pyrimido[4,5-*b*]quinoline-5,6-dione (6c)**

Brownish orange solid, mp. 218 – 220 °C; <sup>1</sup>H-NMR (400 MHz, DMSO-*d*<sub>6</sub>) (δ, ppm): δ 10.72 (s, 1H, NH), 8.52 (d, *J* = 8.1 Hz, 1H, Ar-H), 7.95 (d, *J* = 7.5 Hz, 2H, Ar-H), 7.65 (t, *J* = 7.5 Hz, 1H, Ar-H), 7.19 (d, *J* = 8.1 Hz, 1H, Ar-H), 6.41 (d, *J* = 7.8 Hz, 2H, Ar-H), 5.21 (s, 1H, NH), 3.91 (s, 3H, OCH<sub>3</sub>), 3.82 (s, 3H, OCH<sub>3</sub>), 3.67 (s, 3H, OCH<sub>3</sub>), 3.60 (s, 3H, OCH<sub>3</sub>); <sup>13</sup>C-NMR (100 MHz, DMSO-*d*<sub>6</sub>) (δ, ppm): 179.0 (C=O), 175.8 (C=O), 168.0, 162.9, 159.2, 158.5, 156.5, 146.1, 134.9, 131.4, 131.0, 130.5, 130.1, 128.5, 124.7, 124.6, 112.7, 104.5, 98.9, 94.8, 55.5 (OCH<sub>3</sub>), 55.0 (OCH<sub>3</sub>), 54.5 (OCH<sub>3</sub>), 54.0 (OCH<sub>3</sub>), 31.6 (C<sub>chiral</sub>); HRMS(ES<sup>+</sup>): 460.1247 [M + H]<sup>+</sup>.

**1.2.7. 5-(2,5-dimethoxyphenyl)-2,4-dimethoxy-5,12-dihydrobenzo[*g*]pyrimido[4,5-*b*]quinoline-6,11-dione (5d)**

Orange solid, mp. 238 – 240 °C; <sup>1</sup>H-NMR (400 MHz, DMSO-*d*<sub>6</sub>) (δ, ppm): 9.85 (s, 1H, NH), 8.05 – 7.98 (m, 1H, Ar-H), 7.89 – 7.75 (m, 3H, Ar-H), 6.86 – 6.79 (m, 2H, Ar-H), 6.70 (dd, *J* = 8.9, 3.0 Hz, 1H, Ar-H), 5.40 (s, 1H, CH), 3.86 (s, 3H, OCH<sub>3</sub>), 3.80 (s, 3H, OCH<sub>3</sub>), 3.67 (s, 3H, OCH<sub>3</sub>), 3.59 (s, 3H, OCH<sub>3</sub>); <sup>13</sup>C-NMR (100 MHz, DMSO-*d*<sub>6</sub>) (δ, ppm): 181.8 (C=O), 179.7 (C=O), 168.5, 163.5, 156.8, 153.2, 152.4, 140.4, 135.3, 134.0, 133.6, 132.3, 130.6, 126.3, 126.1, 117.5, 113.5, 112.5, 93.9, 56.7 (OCH<sub>3</sub>), 55.7 (OCH<sub>3</sub>), 54.8 (OCH<sub>3</sub>), 54.4 (OCH<sub>3</sub>), 33.1 (C<sub>chiral</sub>); HRMS(ES<sup>+</sup>): 460.0569 [M + H]<sup>+</sup>.

**1.2.8. 7-(2,5-dimethoxyphenyl)-8,10-dimethoxy-7,12-dihydrobenzo[*h*]pyrimido[4,5-*b*]quinoline-5,6-dione (6d)**

Brownish orange solid, mp. 218 – 220 °C; <sup>1</sup>H-NMR (400 MHz, DMSO-*d*<sub>6</sub>) (δ, ppm): δ 10.77 (s, 1H, NH), 8.53 (d, *J* = 8.0 Hz, 1H, Ar-H), 7.96 (dd, *J* = 7.6, 1.5 Hz, 1H, Ar-H), 7.83 (td, *J* = 7.7, 1.5 Hz, 1H, Ar-H), 7.69 – 7.63 (m, 1H, Ar-H), 6.86 (d, *J* = 3.1 Hz, 1H, Ar-H), 6.78 (d, *J* = 8.9 Hz, 1H, Ar-H), 6.69 (dd, *J* = 8.8, 3.1 Hz, 1H, Ar-H), 5.21 (s, 1H, CH), 3.91 (s, 3H, OCH<sub>3</sub>), 3.83 (s, 3H, OCH<sub>3</sub>), 3.67 (s, 3H, OCH<sub>3</sub>), 3.54 (s, 3H, OCH<sub>3</sub>); <sup>13</sup>C-NMR (100 MHz, DMSO-*d*<sub>6</sub>) (δ, ppm): 178.9 (C=O), 175.7 (C=O), 168.1, 163.0, 156.6, 152.6, 152.1, 146.3, 134.8, 133.2, 131.1, 130.5, 130.0, 128.5, 124.6, 117.4, 113.1, 112.3, 111.8, 94.4, 56.2 (OCH<sub>3</sub>), 55.3 (OCH<sub>3</sub>), 54.5 (OCH<sub>3</sub>), 54.0 (OCH<sub>3</sub>), 32.6 (C<sub>chiral</sub>); HRMS(ES<sup>+</sup>): 460.0569 [M + H]<sup>+</sup>.

**1.2.9. 5-(3,4-dimethoxyphenyl)-2,4-dimethoxy-5,12-dihydrobenzo[*g*]pyrimido[4,5-*b*]quinoline-6,11-dione (5e)**

Orange solid, mp. 238 – 240 °C; <sup>1</sup>H-NMR (400 MHz, DMSO-*d*<sub>6</sub>) (δ, ppm): 9.94 (s, 1H, NH), 8.04 (d, *J* = 6.5 Hz, 1H, Ar-H), 7.92 (d, *J* = 7.0 Hz, 1H, Ar-H), 7.85-7.78 (m, 2H, Ar-H), 6.89 (s, 1H, Ar-H), 6.77 (d, *J* = 8.4 Hz, 1H, Ar-H), 6.68 (d, *J* = 8.2 Hz, 1H, Ar-H), 5.26 (s, 1H, CH), 3.89 (s, 6H, OCH<sub>3</sub>), 3.70 (s, 3H, OCH<sub>3</sub>), 3.64 (s, 3H, OCH<sub>3</sub>); <sup>13</sup>C-NMR (100 MHz, DMSO-*d*<sub>6</sub>) (δ, ppm): 181.6 (C=O),

179.1 (C=O), 168.1, 163.2, 155.8, 148.3, 147.6, 139.4, 137.5, 134.7, 133.3, 131.8, 130.4, 126.0, 125.7, 119.5, 118.0, 111.8, 111.7, 94.3, 55.5 (OCH<sub>3</sub>), 55.4 (OCH<sub>3</sub>), 54.4 (OCH<sub>3</sub>), 54.1 (OCH<sub>3</sub>), 34.0 (C<sub>chiral</sub>); HRMS(ES<sup>+</sup>): 460.0644 [M + H]<sup>+</sup>.

**1.2.10. 7-(3,4-dimethoxyphenyl)-8,10-dimethoxy-7,12-dihydrobenzo[*h*]pyrimido[4,5-*b*]quinoline-5,6-dione (6e)**

Brownish orange solid, mp. 224 – 226 °C; <sup>1</sup>H-NMR (500 MHz, DMSO-*d*<sub>6</sub>) (δ, ppm): δ 10.77 (s, 1H, NH), 8.50 (d, *J* = 7.5 Hz, 1H, Ar-H), 7.99 (d, *J* = 6.0 Hz, 1H, Ar-H), 7.83 (t, *J* = 7.5 Hz, 1H, Ar-H), 7.67 (t, *J* = 7.5 Hz, 1H, Ar-H), 6.90 (s, 1H, Ar-H), 6.77 (d, *J* = 8.5 Hz, 1H, Ar-H), 6.62 (d, *J* = 8.5 Hz, 1H, Ar-H), 5.16 (s, 1H, CH), 3.93 (s, 3H, OCH<sub>3</sub>), 3.91 (s, 3H, OCH<sub>3</sub>), 3.69 (s, 3H, OCH<sub>3</sub>), 3.64 (s, 3H, OCH<sub>3</sub>); <sup>13</sup>C-NMR (125 MHz, DMSO-*d*<sub>6</sub>) (δ, ppm): 178.7 (C=O), 175.9 (C=O), 168.1, 163.1, 155.9, 148.1, 147.4, 145.6, 137.5, 134.7, 131.1, 130.5, 129.7, 128.5, 124.6, 118.9, 113.4, 111.7, 111.6, 95.5, 55.3 (OCH<sub>3</sub>), 54.3 (OCH<sub>3</sub>), 54.5 (OCH<sub>3</sub>), 54.1 (OCH<sub>3</sub>), 33.2 (C<sub>chiral</sub>); HRMS(ES<sup>+</sup>): 460.0644 [M + H]<sup>+</sup>.

**1.2.11. 5-(3,5-dimethoxyphenyl)-2,4-dimethoxy-5,12-dihydrobenzo[*g*]pyrimido[4,5-*b*]quinoline-6,11-dione (5f)**

Orange solid, mp. 236 – 238 °C; <sup>1</sup>H-NMR (400 MHz, DMSO-*d*<sub>6</sub>) (δ, ppm): 9.86 (s, 1H, NH), 8.03 (d, *J* = 6.6 Hz, 1H, Ar-H), 7.87 (d, *J* = 7.1 Hz, 1H, Ar-H), 7.84-7.78 (m, 2H, Ar-H), 6.85 (d, *J* = 3.1 Hz, 1H, Ar-H), 6.82 (d, *J* = 8.9 Hz, 1H, Ar-H), 6.71 (dd, *J* = 8.9, 3.0 Hz, 1H, Ar-H), 5.40 (s, 1H, CH), 3.87 (s, 3H, OCH<sub>3</sub>), 3.81 (s, 3H, OCH<sub>3</sub>), 3.67 (s, 3H, OCH<sub>3</sub>), 3.60 (s, 3H, OCH<sub>3</sub>); <sup>13</sup>C-NMR (100 MHz, DMSO-*d*<sub>6</sub>) (δ, ppm): 181.3 (C=O), 179.2 (C=O), 167.9, 162.9, 159.3, 158.4, 156.2, 139.6, 134.7, 133.1, 131.8, 131.1, 130.1, 125.8, 125.5, 125.1, 117.4, 104.7, 98.8, 93.7, 55.5 (OCH<sub>3</sub>), 55.0 (OCH<sub>3</sub>), 54.3 (OCH<sub>3</sub>), 53.9 (OCH<sub>3</sub>), 31.5 (C<sub>chiral</sub>); HRMS(ES<sup>+</sup>): 460.1247 [M + H]<sup>+</sup>.

**1.2.12. 7-(3,5-dimethoxyphenyl)-8,10-dimethoxy-7,12-dihydrobenzo[*h*]pyrimido[4,5-*b*]quinoline-5,6-dione (6f)**

Brownish orange solid, mp. 222 – 224 °C; <sup>1</sup>H-NMR (400 MHz, DMSO-*d*<sub>6</sub>) (δ, ppm): δ 10.78 (s, 1H, NH), 8.54 (d, *J* = 8.0 Hz, 1H, Ar-H), 7.97 (d, *J* = 7.6 Hz, 1H, Ar-H), 7.84 (t, *J* = 7.7 Hz, 1H, Ar-H), 6.87 (d, *J* = 3.1 Hz, 1H, Ar-H), 6.79 (d, *J* = 8.9 Hz, 1H, Ar-H), 6.70 (dd, *J* = 8.8, 3.1 Hz, 1H, Ar-H), 5.22 (s, 1H, CH), 3.92 (s, 3H, OCH<sub>3</sub>), 3.84 (s, 3H, OCH<sub>3</sub>), 3.68 (s, 3H, OCH<sub>3</sub>), 3.55 (s, 3H, OCH<sub>3</sub>); <sup>13</sup>C-NMR (100 MHz, DMSO-*d*<sub>6</sub>) (δ, ppm): 179.4 (C=O), 176.2 (C=O), 168.5, 163.5, 157.1, 153.1, 152.5, 146.8, 135.3, 133.7, 131.5, 131.0, 130.4, 129.0, 125.1, 117.9, 113.6, 112.8, 112.2, 94.9, 56.7 (OCH<sub>3</sub>), 55.7 (OCH<sub>3</sub>), 54.9 (OCH<sub>3</sub>), 54.5 (OCH<sub>3</sub>), 33.11 (C<sub>chiral</sub>); HRMS(ES<sup>+</sup>): 460.1247 [M + H]<sup>+</sup>.

**1.2.13. 5-(4-hydroxy-3-methoxyphenyl)-2,4-dimethoxy-5,12-dihydrobenzo[*g*]pyrimido[4,5-*b*]quinoline-6,11-dione (5g)**

Orange solid, mp. 234 – 236 °C; <sup>1</sup>H-NMR (400 MHz, DMSO-d<sub>6</sub>) (δ, ppm): 9.86 (s, 1H, NH), 8.81 (s, 1H, OH), 8.04 (dd, *J* = 7.3, 1.6 Hz, 1H, Ar-H), 7.92 (dd, *J* = 7.4, 1.6 Hz, 1H, Ar-H), 7.81 (pd, *J* = 7.4, 1.6 Hz, 2H, Ar-H), 6.85 (d, *J* = 1.9 Hz, 1H, Ar-H), 6.62 – 6.54 (m, 2H, Ar-H), 5.23 (s, 1H, CH), 3.89 (s, 3H, OCH<sub>3</sub>), 3.88 (s, 3H, OCH<sub>3</sub>), 3.71 (s, 3H, OCH<sub>3</sub>); <sup>13</sup>C-NMR (100 MHz, DMSO-d<sub>6</sub>) (δ, ppm): 181.6 (C=O), 179.1 (C=O), 168.1, 163.2, 155.7, 147.1, 145.4, 139.3, 136.0, 134.7, 133.3, 131.8, 130.4, 125.9, 125.7, 119.8, 118.2, 115.3, 112.0, 94.5, 55.6 (OCH<sub>3</sub>), 54.4 (OCH<sub>3</sub>), 54.0 (OCH<sub>3</sub>), 33.9 (C<sub>chiral</sub>); HRMS(ES<sup>+</sup>): 446.0551 [M + H]<sup>+</sup>.

**1.2.14. 7-(4-hydroxy-3-methoxyphenyl)-8,10-dimethoxy-7,12-dihydrobenzo[*h*]pyrimido[4,5-*b*]quinoline-5,6-dione (6g)**

Brownish orange solid, mp. 252 – 254 °C; <sup>1</sup>H-NMR (400 MHz, DMSO-d<sub>6</sub>) (δ, ppm): δ 10.74 (s, 1H, NH), 8.77 (s, 1H, OH), 8.51 (d, *J* = 8.0 Hz, 1H, Ar-H), 7.99 (d, *J* = 7.7 Hz, 1H, Ar-H), 7.83 (t, *J* = 7.5 Hz, 1H, Ar-H), 7.67 (t, *J* = 7.5 Hz, 1H, Ar-H), 6.87 (s, 1H, Ar-H), 6.59 (d, *J* = 8.1 Hz, 1H, Ar-H), 6.51 (d, *J* = 8.1 Hz, 1H, Ar-H), 5.14 (s, 1H, CH), 3.93 (s, 3H, OCH<sub>3</sub>), 3.92 (s, 3H, OCH<sub>3</sub>), 3.70 (s, 3H, OCH<sub>3</sub>); <sup>13</sup>C-NMR (100 MHz, DMSO-d<sub>6</sub>) (δ, ppm): 178.8 (C=O), 176.0 (C=O), 168.2, 163.1, 156.0, 147.0, 145.7, 145.2, 136.1, 134.8, 131.1, 130.6, 129.8, 128.6, 124.7, 119.3, 115.3, 113.7, 112.1, 95.8, 55.6 (OCH<sub>3</sub>), 54.5 (OCH<sub>3</sub>), 54.1 (OCH<sub>3</sub>), 33.1 (C<sub>chiral</sub>); HRMS(ES<sup>+</sup>): 446.0551 [M + H]<sup>+</sup>.

**1.2.15. 2,4-dimethoxy-5-(3,4,5-trimethoxyphenyl)-5,12-dihydrobenzo[*g*]pyrimido[4,5-*b*]quinoline-6,11-dione (5h)**

Orange solid, mp. 228 – 230 °C; <sup>1</sup>H-NMR (400 MHz, DMSO-d<sub>6</sub>) (δ, ppm): 9.92 (s, 1H, NH), 8.06 (dd, *J* = 6.9, 2.0 Hz, 1H, Ar-H), 7.94 (dd, *J* = 6.9, 1.9 Hz, 1H, Ar-H), 7.84 (qt, *J* = 7.4, 3.6 Hz, 2H, Ar-H), 6.54 (s, 2H, Ar-H), 5.29 (s, 1H, CH), 3.92 (s, 3H, OCH<sub>3</sub>), 3.90 (s, 3H, OCH<sub>3</sub>), 3.69 (s, 6H, OCH<sub>3</sub>), 3.58 (s, 3H, OCH<sub>3</sub>); <sup>13</sup>C-NMR (100 MHz, DMSO-d<sub>6</sub>) (δ, ppm): 181.3 (C=O), 179.2 (C=O), 168.0, 163.0, 156.3, 152.7, 151.9, 139.9, 134.8, 133.5, 133.1, 131.8, 130.1, 125.8, 125.6, 117.0, 113.0, 112.0, 93.4, 56.2 (OCH<sub>3</sub>), 55.2 (OCH<sub>3</sub>), 54.3 (OCH<sub>3</sub>), 53.9 (OCH<sub>3</sub>), 32.6 (C<sub>chiral</sub>); HRMS(ES<sup>+</sup>): 490.0702 [M + H]<sup>+</sup>.

**1.2.16. 8,10-dimethoxy-7-(3,4,5-trimethoxyphenyl)-7,12-dihydrobenzo[*h*]pyrimido[4,5-*b*]quinoline-5,6-dione (6h)**

Brownish orange solid, mp. 220 – 222 °C; <sup>1</sup>H-NMR (400 MHz, DMSO-d<sub>6</sub>) (δ, ppm): δ 10.76 (s, 1H, NH), 8.51 (d, *J* = 7.9 Hz, 1H, Ar-H), 8.00 (dd, *J* = 7.6, 1.5 Hz, 1H, Ar-H), 7.83 (td, *J* = 7.7, 1.5 Hz, 1H, Ar-H), 7.67 (td, *J* = 7.5, 0.9 Hz, 1H, Ar-H), 6.50 (s, 2H, Ar-H), 5.19 (s, 1H, CH), 3.94 (s, 3H, OCH<sub>3</sub>), 3.93 (s, 3H, OCH<sub>3</sub>), 3.66 (s, 6H, OCH<sub>3</sub>), 3.57 (s, 3H, OCH<sub>3</sub>); <sup>13</sup>C-NMR (100 MHz, DMSO-d<sub>6</sub>) (δ, ppm): 179.1 (C=O), 176.4 (C=O), 168.7, 163.7, 156.4, 153.1, 146.3, 140.9, 136.8, 135.2, 131.6, 131.1, 130.1, 129.0, 125.2, 113.6, 105.3, 105.0, 95.7, 60.3 (OCH<sub>3</sub>), 56.2 (OCH<sub>3</sub>), 55.0 (OCH<sub>3</sub>), 54.6 (OCH<sub>3</sub>), 34.5 (C<sub>chiral</sub>); HRMS(ES<sup>+</sup>): 490.0702 [M + H]<sup>+</sup>.



**1.2.17. 5-(6-bromobenzo[*d*][1,3]dioxol-5-yl)-2,4-dimethoxy-5,12-dihydrobenzo[*g*]pyrimido[4,5-*b*]quinoline-6,11-dione (5i)**

Orange solid, mp. 224 – 226 °C; <sup>1</sup>H-NMR (400 MHz, DMSO-*d*<sub>6</sub>) (δ, ppm): 9.91 (s, 1H, NH), 8.03 (s, 1H, Ar-H), 7.89 (s, 1H, Ar-H), 7.82 (d, *J* = 6.0 Hz, 2H, Ar-H), 7.07 (s, 1H, Ar-H), 6.80 (s, 1H, Ar-H), 5.95 (s, 2H, OCH<sub>2</sub>O), 5.60 (s, 1H, CH), 3.88 (s, 3H, OCH<sub>3</sub>), 3.81 (s, 3H, OCH<sub>3</sub>); <sup>13</sup>C-NMR (100 MHz, DMSO-*d*<sub>6</sub>) (δ, ppm): 181.2 (C=O), 178.9 (C=O), 168.4, 163.3, 155.5, 147.3, 146.8, 139.8, 137.7, 134.7, 133.2, 131.8, 130.3, 125.9, 125.6, 117.7, 113.0, 111.7, 110.2, 101.8 (OCH<sub>2</sub>O), 93.9, 54.4 (OCH<sub>3</sub>), 53.8 (OCH<sub>3</sub>), 35.6 (C<sub>chiral</sub>); HRMS(ES<sup>+</sup>): 521.9385 [M + H]<sup>+</sup>.

**1.2.18. 7-(6-bromobenzo[*d*][1,3]dioxol-5-yl)-8,10-dimethoxy-7,12-dihydrobenzo[*h*]pyrimido[4,5-*b*]quinoline-5,6-dione (6i)**

Brownish orange solid, mp. 252 – 254 °C; <sup>1</sup>H-NMR (400 MHz, DMSO-*d*<sub>6</sub>) (δ, ppm): δ 10.72 (s, 1H, NH), 7.99 (dd, *J* = 7.6, 1.5 Hz, 1H, Ar-H), 7.89 – 7.82 (m, 2H, Ar-H), 7.68 (dd, *J* = 8.3, 6.0 Hz, 2H, Ar-H), 7.04 (s, 1H, Ar-H), 6.77 (s, 1H, Ar-H), 5.95 (s, 2H, OCH<sub>2</sub>O), 5.45 (s, 1H, CH), 3.92 (s, 3H, OCH<sub>3</sub>), 3.83 (s, 3H, OCH<sub>3</sub>); <sup>13</sup>C-NMR (100 MHz, DMSO-*d*<sub>6</sub>) (δ, ppm): 179.1 (C=O), 176.4 (C=O), 169.0, 163.8, 156.3, 147.6, 147.2, 146.3, 137.9, 135.2, 131.7, 131.1, 130.2, 129.0, 126.2, 125.5, 113.8, 112.2, 110.6, 102.3 (OCH<sub>2</sub>O), 95.4, 55.0 (OCH<sub>3</sub>), 54.4 (OCH<sub>3</sub>), 35.8 (C<sub>chiral</sub>); HRMS(ES<sup>+</sup>): 521.9385 [M + H]<sup>+</sup>.

**1.2.19. 5-(4-ethoxyphenyl)-2,4-dimethoxy-5,12-dihydrobenzo[*g*]pyrimido[4,5-*b*]quinoline-6,11-dione (5j)**

Orange solid, mp. 208 – 210 °C; <sup>1</sup>H-NMR (400 MHz, DMSO-*d*<sub>6</sub>) (δ, ppm): 9.95 (s, 1H, NH), 8.05 – 8.01 (m, 1H, Ar-H), 7.93 – 7.89 (m, 1H, Ar-H), 7.81 (pd, *J* = 7.3, 1.7 Hz, 2H, Ar-H), 7.14 (d, *J* = 8.7 Hz, 2H, Ar-H), 6.76 (d, *J* = 8.7 Hz, 2H, Ar-H), 5.26 (s, 1H, CH), 3.92 (m, 2H, CH<sub>2</sub>), 3.89 (s, 3H, OCH<sub>3</sub>), 3.86 (s, 3H, OCH<sub>3</sub>), 1.25 (t, *J* = 7.0 Hz, 3H, CH<sub>3</sub>); <sup>13</sup>C-NMR (100 MHz, DMSO-*d*<sub>6</sub>) (δ, ppm): 181.5 (C=O), 179.1 (C=O), 168.1, 163.2, 157.2, 155.8, 139.2, 137.0, 134.7, 133.3, 131.8, 130.3, 128.6, 125.9, 125.6, 118.3, 114.2, 94.3, 62.8 (OCH<sub>2</sub>), 54.4 (OCH<sub>3</sub>), 54.1 (OCH<sub>3</sub>), 33.6 (C<sub>chiral</sub>), 14.6 (CH<sub>3</sub>); HRMS(ES<sup>+</sup>): 444.0575 [M + H]<sup>+</sup>.

**1.2.20. 7-(4-ethoxyphenyl)-8,10-dimethoxy-7,12-dihydrobenzo[*h*]pyrimido[4,5-*b*]quinoline-5,6-dione (6j)**

Brownish orange solid, mp. 226 – 228 °C; <sup>1</sup>H-NMR (400 MHz, DMSO-*d*<sub>6</sub>) (δ, ppm): δ 10.80 (s, 1H, NH), 8.52 (d, *J* = 7.9 Hz, 1H, Ar-H), 7.98 (d, *J* = 7.6 Hz, 1H, Ar-H), 7.83 (t, *J* = 7.7 Hz, 1H, Ar-H), 7.67 (t, *J* = 7.6 Hz, 1H, Ar-H), 7.12 (d, *J* = 8.3 Hz, 2H, Ar-H), 6.75 (d, *J* = 8.3 Hz, 2H, Ar-H), 5.15 (s, 1H, CH), 3.93 (s, 3H, OCH<sub>3</sub>), 3.91 (d, *J* = 6.9 Hz, 2H, CH<sub>2</sub>), 3.89 (s, 3H, OCH<sub>3</sub>), 1.25 (t, *J* = 7.0 Hz, 3H, CH<sub>3</sub>); <sup>13</sup>C-NMR (100 MHz, DMSO-*d*<sub>6</sub>) (δ, ppm): 178.8 (C=O), 175.9 (C=O), 168.2, 163.2, 157.1, 156.0, 145.6, 137.1, 134.8, 131.1, 130.5, 129.8, 128.6, 128.4, 124.7, 114.1, 113.8, 95.6, 62.8 (OCH<sub>2</sub>), 54.6 (OCH<sub>3</sub>), 54.2 (OCH<sub>3</sub>), 32.9 (C<sub>chiral</sub>), 14.6 (CH<sub>3</sub>); HRMS(ES<sup>+</sup>): 444.0575 [M + H]<sup>+</sup>.

### 1.3. Cell Based Assays

#### 1.3.1 Materials and cell lines

Primary patient glioblastoma cells GBM6, GBM22 and GBM143 were acquired from the Brain Tumour PDX National Resource, Mayo Clinic, USA. Propidium iodide, insulin and epidermal growth factor were purchased from Sigma Millipore. Temozolomide was from Accord Healthcare. Immunoblot analyses were carried out as stated previously<sup>1-3</sup>. The following antibodies were used for immunoblotting: total AKT (Cell Signalling #9272), phospho Thr308 AKT (Cell Signalling #2965), total p44/42 ERK1/2 (Cell Signalling #4695), phospho Thr202/Tyr204 p44/42 ERK1/2 (Cell Signalling #4376), total STAT3 (Cell Signalling #9139), and phospho Tyr705 STAT3 (Cell Signalling #9145).

#### 1.3.2 Cell Culture

Mammalian cells were grown in a humidified incubator with 5% CO<sub>2</sub> at 37°C. Primary patient glioblastoma cell lines were cultured in GBM media (DMEM supplemented with 10% FBS, 1% penicillin and streptomycin, 10 µg/ml insulin, and 20 ng/ml hEGF) as reported previously<sup>4-6</sup>.

#### 1.3.3 Cell viability assay

Cell viability was measured as stated previously<sup>7, 8</sup>. Briefly, equal number of cells were seeded per well in 96 well plates. After 72 hours treatment of indicated drugs or DMSO control 10 µl of MTS was added. After one hour incubation at 37 °C, absorbance was measured at 450 nm using a Tecan multi-well plate reader and data was represented as % viability compared to DMSO treated control as stated previously.

#### 1.3.4 Proliferation and colony formation assays

Cell proliferation was measured as stated previously<sup>1,9</sup>. Briefly, GBM6 cells were seeded in a 96 well plate at 3,000 cells per well in GBM media and cells were allowed to attach and enter log phase before drug treatment. DMSO, 2.9 µM (**5c**) and 3.3 µM (**5h**) were added. Every 24 hours afterwards, cell viability was assessed using CellTiter 96<sup>®</sup> AQueous One Solution Cell Proliferation Assay (MTS) kit following manufacturer's instructions and data was represented as % viability compared to DMSO treated control for a total of 5 days.

For colony formation assay, approximately 500 cells/well of GBM143 were seeded onto a six- well plate. After overnight incubation cells were treated with **5c** or Temozolomide (TMZ) at 3 µM and 50 µM concentrations respectively. The control wells were treated with DMSO. Media was replaced every 3 days along with drug treatment. After 15 days colonies were fixed with methanol and stained using crystal violet (0.5% w/v in deionized water).

### 1.3.5 Spheroid invasion assay

3D spheroid invasion assay was carried out as stated previously<sup>10</sup>. Briefly, 2,000 GBM6 cells were seeded per well in a low attachment u-bottom 96 well plate (Thermo #174925) and spheroids were allowed to form over four days. These spheroids were embedded in Geltrex (Thermo #A1413302) which is a basement membrane extract that contains laminin, collagen IV, entactin, and heparin sulphate proteoglycans. The embedded spheroids were supplemented with complete media at top with or without drugs. The photomicrographs of each well containing spheroid were taken at x100 resolution starting from day 0 (day of embedding the spheroid in matrix) through day 4 or day 6. The relative invasion was calculated using Image J software.

### 1.3.6 Cell cycle analyses

Cell cycle analyses using propidium iodide and flow cytometry were carried out as described previously<sup>3,9</sup>. Asynchronous GBM6 cells were treated with either DMSO or **5c** at 3  $\mu$ M for 16 hr. Post treatment, cells were washed with PBS+1% FBS and resuspended in flow cytometry tubes. Cells were then fixed with 70% ice-cold ethanol and propidium iodide (50  $\mu$ g/ml) was added to the cells and incubated in the dark at room temperature (25°C) for 30 min. The cell populations were then subjected to quantitative measurement of DNA content by flow cytometry using a FACSFortessa (BD Biosciences) and cell cycle distribution and the percentage of G<sub>2</sub>/M–S–G<sub>1</sub> cells to the total cell events were determined by the BD FACS Diva software. Stacked bar graphs were derived using Graphpad Prism.

### 1.3.7 Statistical Analysis

All statistical analysis was done using GraphPad Prism statistical package and presented as mean  $\pm$  SD unless otherwise stated. Figure legends contain details of the statistical tests and multiple comparisons conducted throughout. Experiments were repeated 2-3 times with multiple technical replicates for the appropriate statistical tests to be conducted.

Figure S1: <sup>1</sup>H-NMR (500 MHz, DMSO-d<sub>6</sub>) of Compound 5a.

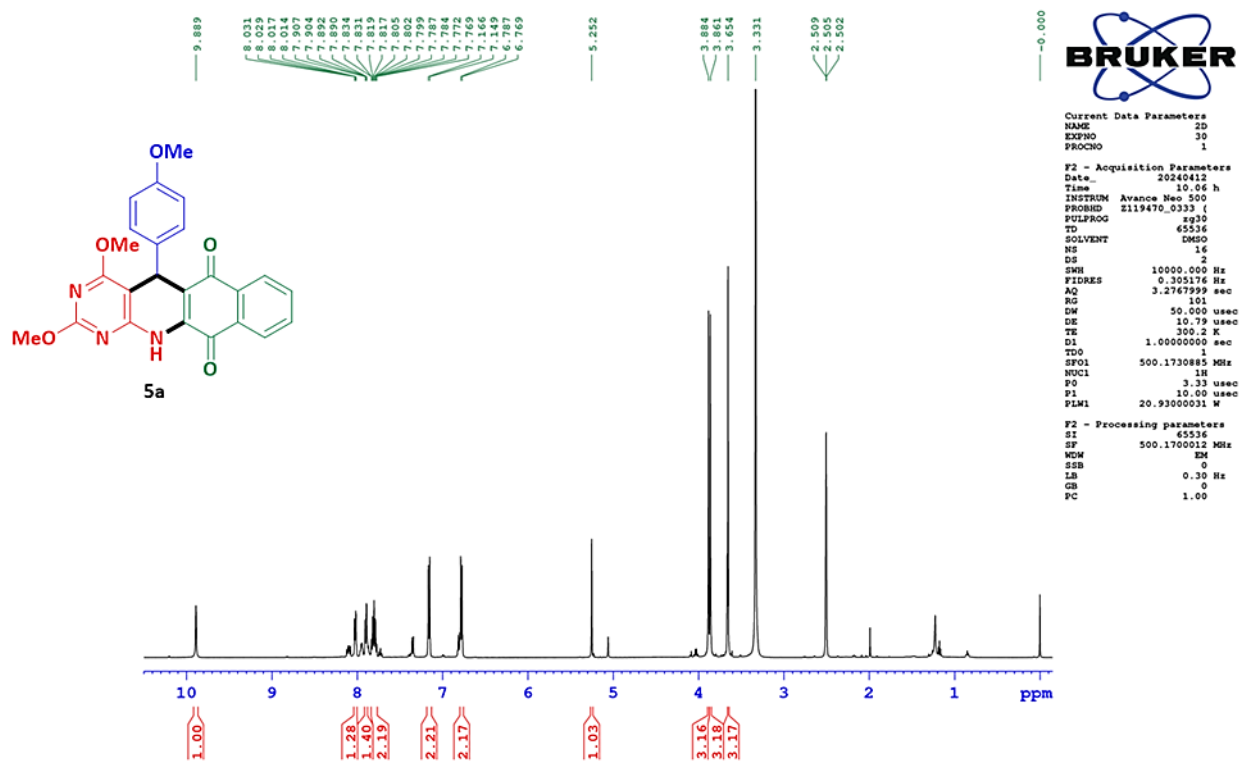

Figure S2: <sup>13</sup>C-NMR (125 MHz, DMSO-d<sub>6</sub>) of Compound 5a.

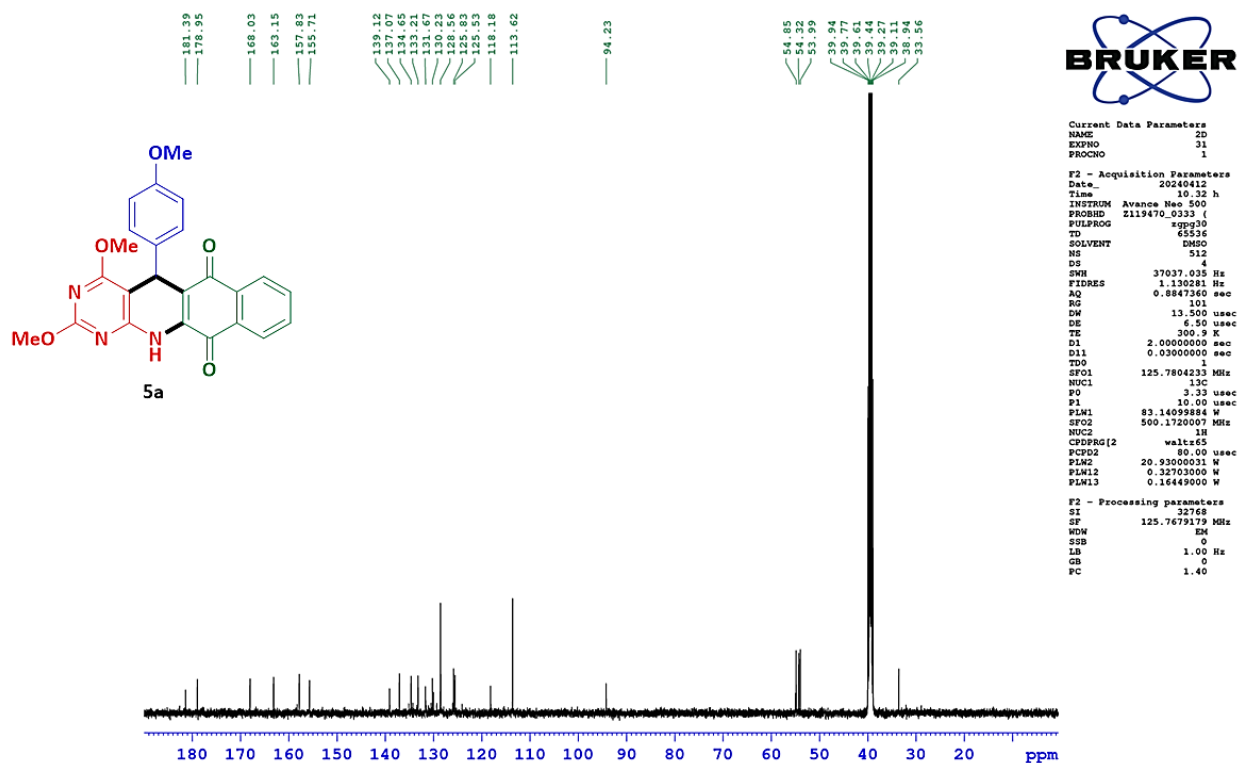

Figure S3:  $^{13}\text{C}$ -DEPT 135 NMR (125 MHz,  $\text{DMSO-d}_6$ ) of Compound 5a.

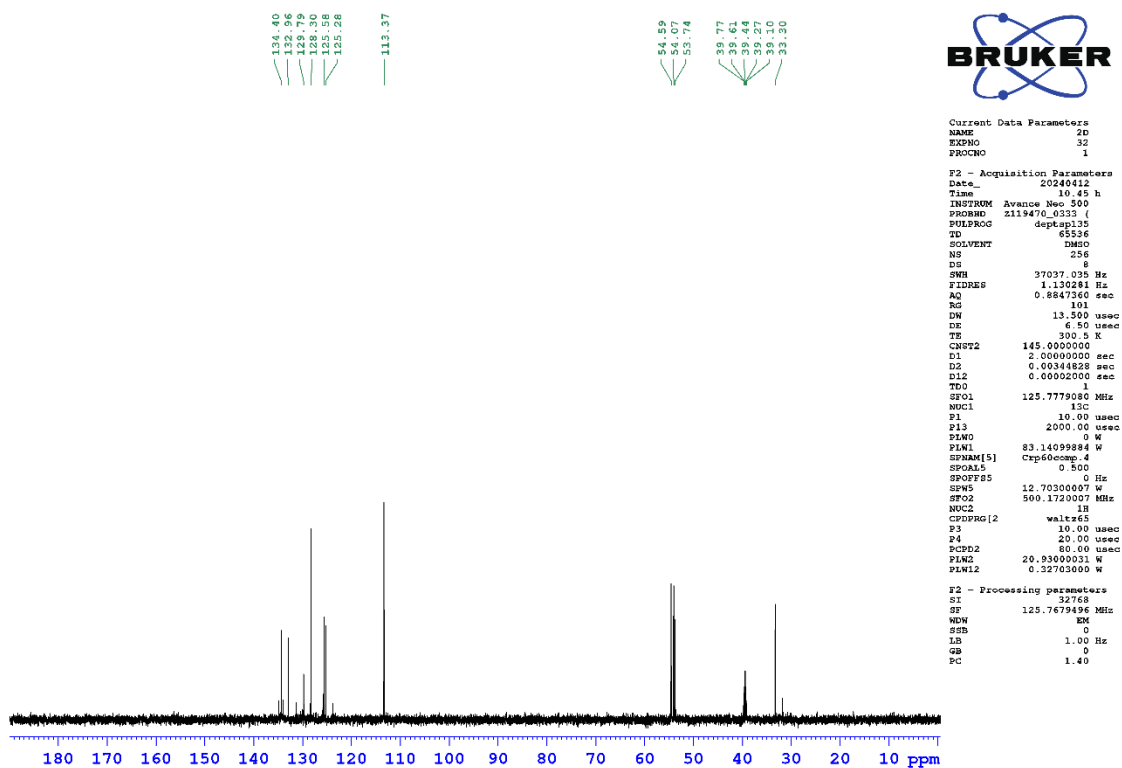

Figure S4: Structure of 5a with labelled C & H atoms and selected HMBC correlation

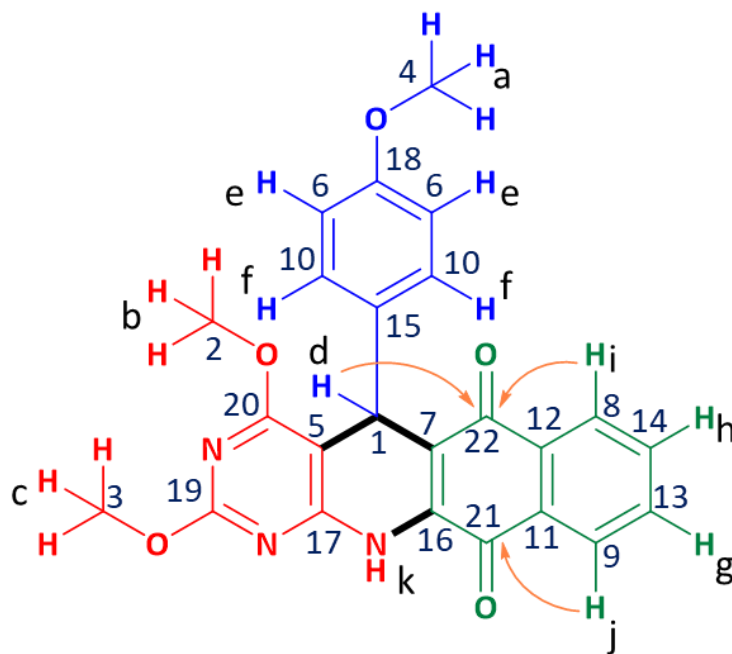

|                | <sup>1</sup> H - <sup>13</sup> C HSQC | <sup>1</sup> H - <sup>13</sup> C HMBC                                                                                                |
|----------------|---------------------------------------|--------------------------------------------------------------------------------------------------------------------------------------|
| Proton (δ ppm) | Carbon (δ ppm)                        | Carbon (δ ppm)                                                                                                                       |
| H-a (δ 3.65)   | C-2 (δ 53.99)                         | C-18 (δ 157.83)                                                                                                                      |
| H-b (δ 3.86)   | C-3 (δ 54.32)                         | C-20 (δ 168.03)                                                                                                                      |
| H-c (δ 3.88)   | C-4 (δ 54.85)                         | C-19 (δ 163.15)                                                                                                                      |
| H-d (δ 5.25)   | C-1 (δ 33.56)                         | C-10 (δ 128.56), C-20 (δ 168.03), C-17 (δ 155.71), C-16 (δ 139.12), C-5 (δ 94.23), C-7 (δ 118.18), C-15 (δ 137.07) & C-22 (δ 181.39) |
| H-e (δ 6.77)   | C-6 (δ 113.62)                        | C-6 (δ 113.62), C-15 (δ 137.07), C-10 (δ 128.56),                                                                                    |
| H-f (δ 7.15)   | C-10 (δ 128.56)                       | C-1 (δ 33.56), C-6 (δ 113.62), C-10 (δ 128.56),                                                                                      |
| H-g (δ 7.78)   | C-13 (δ 133.21)                       | C-11 (δ 130.23), C-8 (δ 125.53)                                                                                                      |
| H-h (δ 7.80)   | C-14 (δ 134.65)                       | C-12 (δ 131.67), C-9 (δ 125.83)                                                                                                      |
| H-i (δ 7.89)   | C-8 (δ 125.53)                        | C-11 (δ 130.23), C-13 (δ 133.21) & C-22 (δ 181.4)                                                                                    |
| H-j (δ 8.02)   | C-9 (δ 125.83)                        | C-12 (δ 131.67), C-14 (δ 134.65), C-21 (δ 178.95)                                                                                    |

**Figure S5:** HSQC Spectrum of Compound **5a**

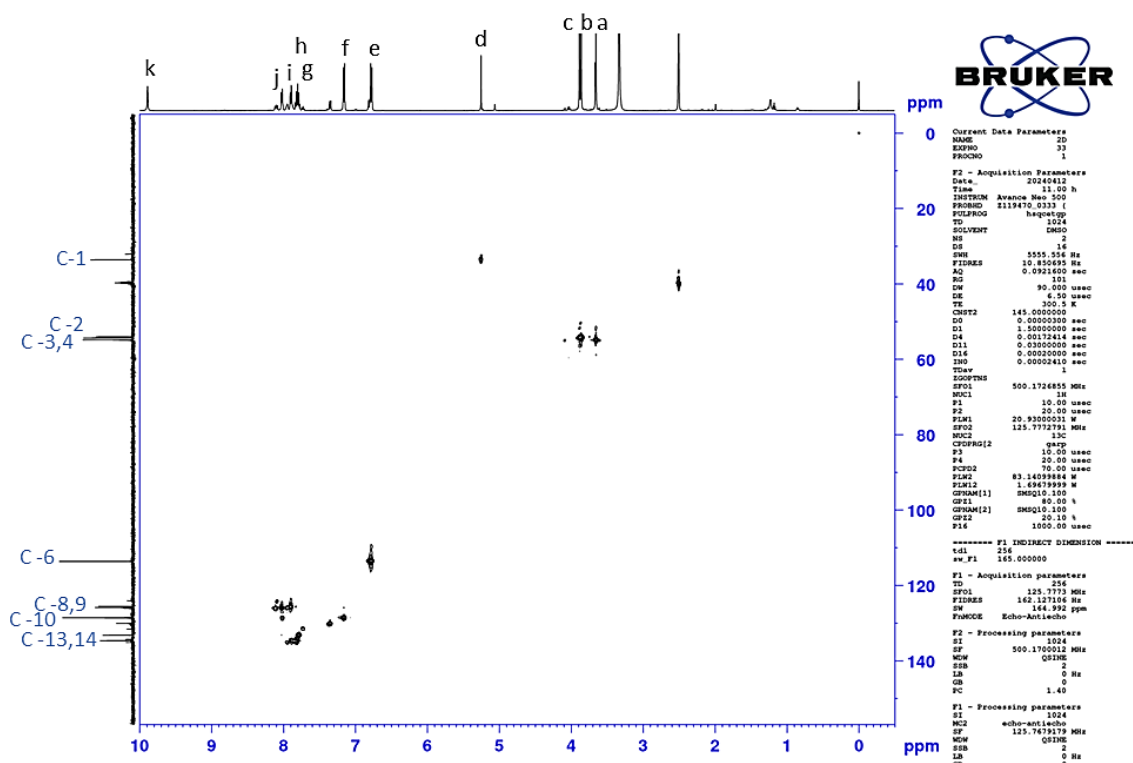

Figure S6: HMBC Spectrum of Compound 5a.

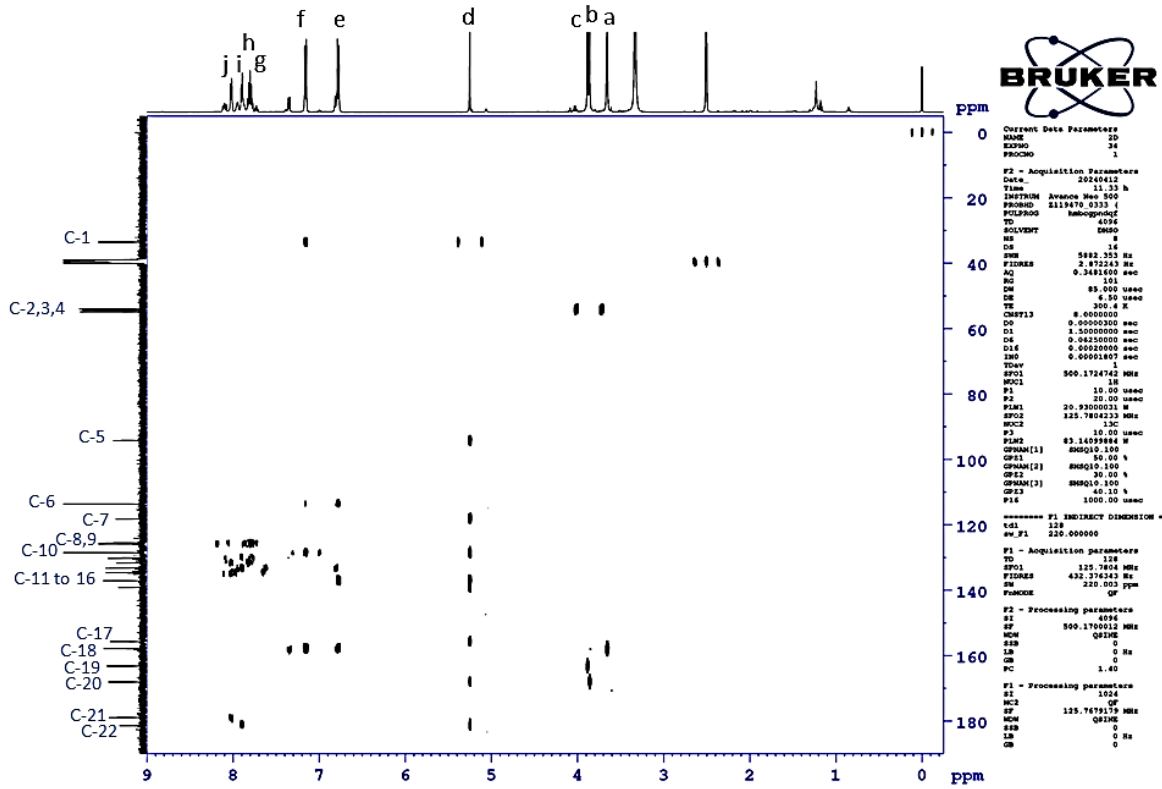

Figure S7: <sup>1</sup>H-NMR (500 MHz, DMSO-d<sub>6</sub>) of Compound 6e.

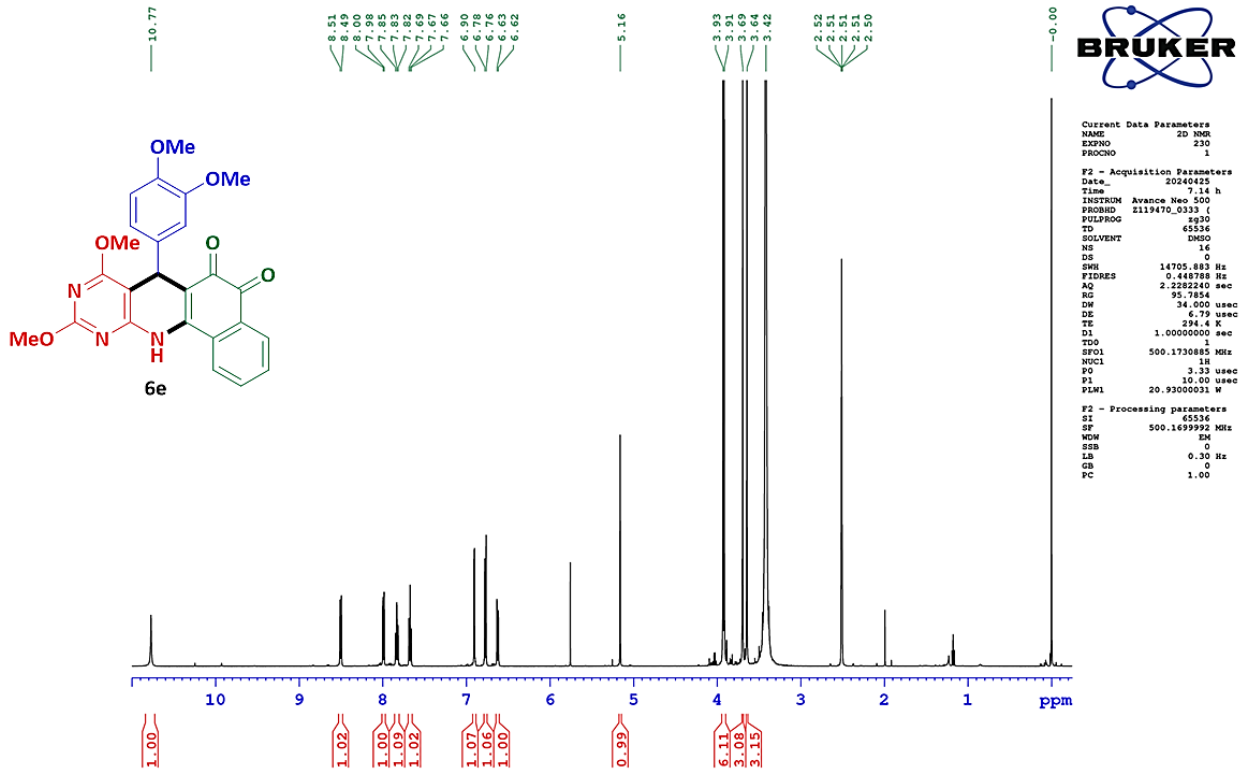

Figure S8: <sup>13</sup>C-NMR (125 MHz, DMSO-d<sub>6</sub>) of Compound 6e.

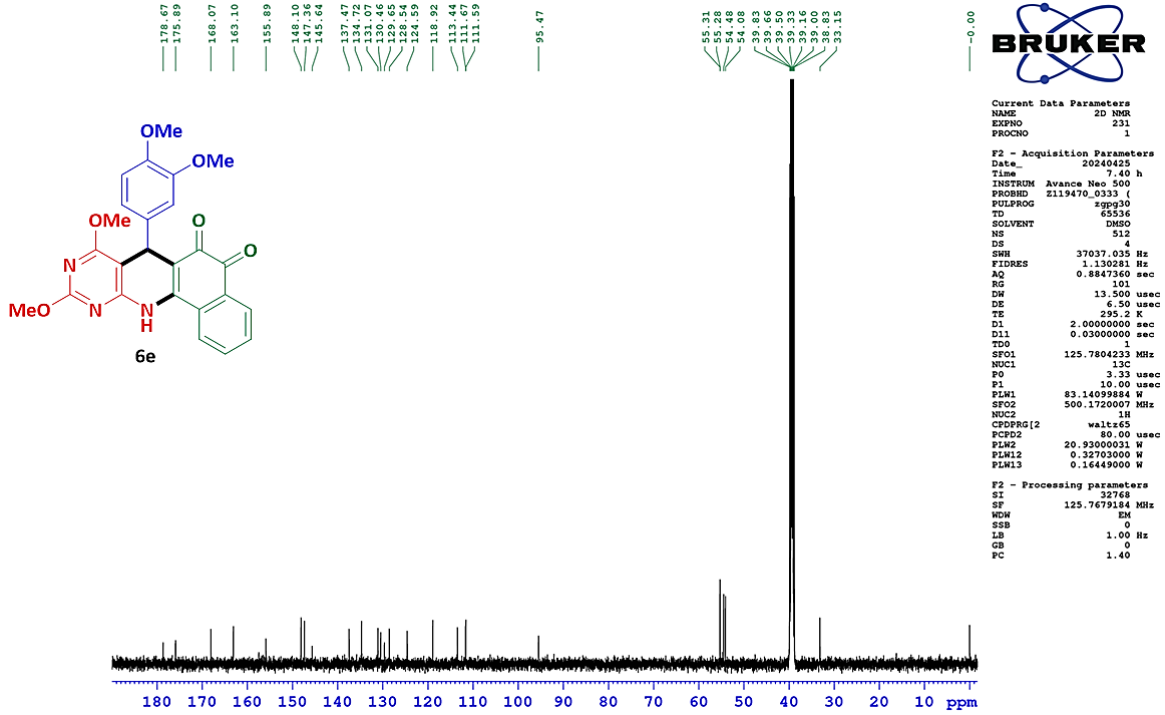

Figure S9: <sup>13</sup>C-DEPT 135 (125 MHz, DMSO-d<sub>6</sub>) of Compound 6e.

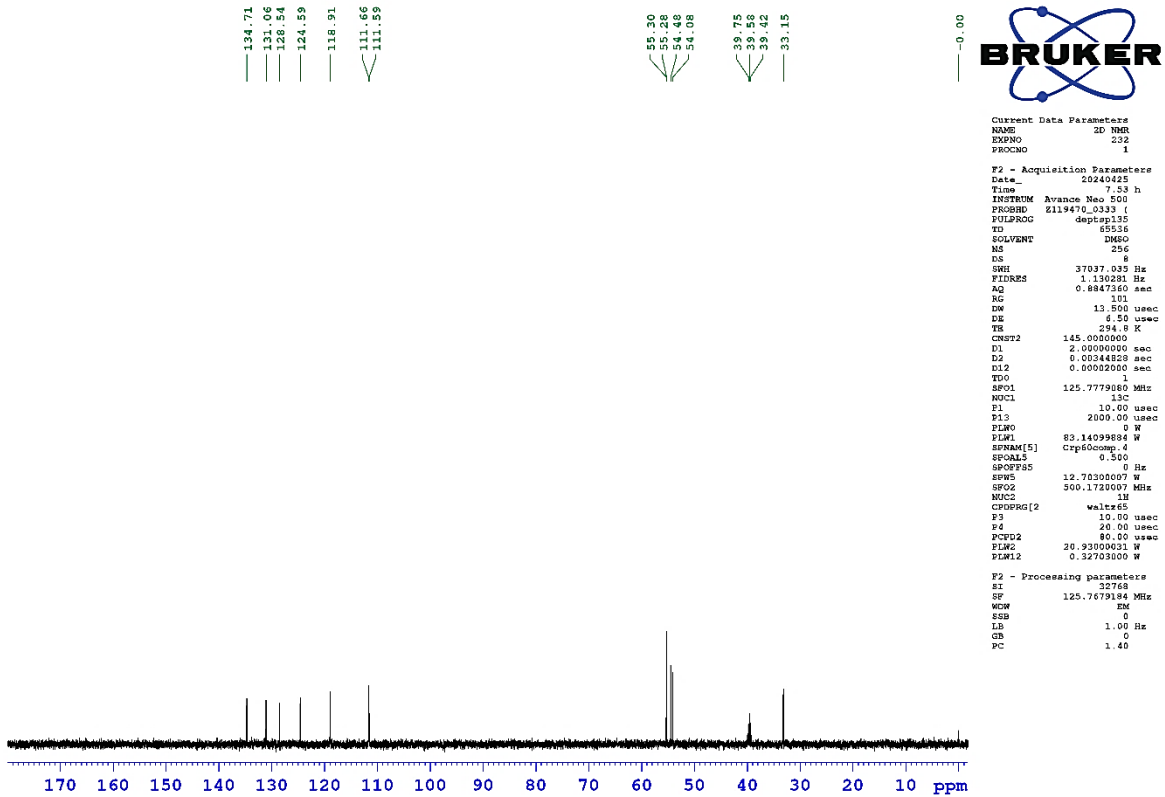



**Figure S10:** Structure of **6e** with labelled C & H atoms and selected HMBC correlation

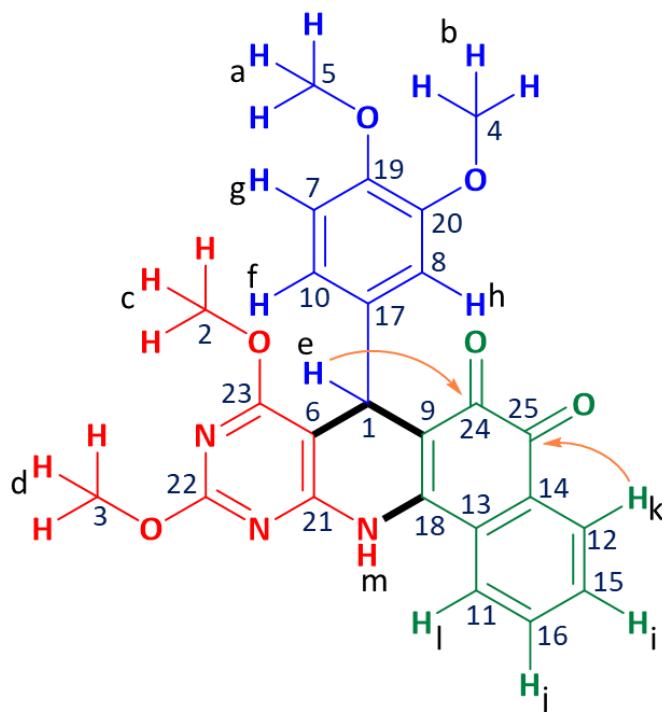

| <b>Table S4.</b> HSQC & HMBC NMR data of Compound <b>6e</b> . |                         |                                                                                                                                                                                                                                    |
|---------------------------------------------------------------|-------------------------|------------------------------------------------------------------------------------------------------------------------------------------------------------------------------------------------------------------------------------|
|                                                               | <b>1H-13C HSQC</b>      | <b>1H-13C HMBC</b>                                                                                                                                                                                                                 |
| Proton ( $\delta$ ppm)                                        | Carbon ( $\delta$ ppm)  | Carbon ( $\delta$ ppm)                                                                                                                                                                                                             |
| H-a ( $\delta$ 3.64)                                          | C-5 ( $\delta$ 55.31)   | C-19 ( $\delta$ 147.36)                                                                                                                                                                                                            |
| H-b ( $\delta$ 3.69)                                          | C-4 ( $\delta$ 55.28)   | C-20 ( $\delta$ 148.10)                                                                                                                                                                                                            |
| H-c ( $\delta$ 3.91)                                          | C-2 ( $\delta$ 54.08)   | C-23 ( $\delta$ 168.07)                                                                                                                                                                                                            |
| H-d ( $\delta$ 3.93)                                          | C-3 ( $\delta$ 54.48).  | C-22 ( $\delta$ 163.10)                                                                                                                                                                                                            |
| H-e ( $\delta$ 5.16)                                          | C-1 ( $\delta$ 33.15)   | C-8 ( $\delta$ 111.67), C-10 ( $\delta$ 118.92), C-23 ( $\delta$ 168.07),<br>C-21 ( $\delta$ 155.89), C-18 ( $\delta$ 145.64), C-6 ( $\delta$ 95.47),<br>C-9 ( $\delta$ 113.44), C-17 ( $\delta$ 137.47) & C-24 ( $\delta$ 175.89) |
| H-f ( $\delta$ 6.63)                                          | C-10 ( $\delta$ 118.92) | C-1 ( $\delta$ 33.15), C-19 ( $\delta$ 147.36), C-8 ( $\delta$ 111.67),                                                                                                                                                            |
| H-g ( $\delta$ 6.77)                                          | C-7 ( $\delta$ 111.59)  | C-17 ( $\delta$ 137.47), C-20 ( $\delta$ 148.10)                                                                                                                                                                                   |
| H-h ( $\delta$ 6.90)                                          | C-8 ( $\delta$ 111.67)  | C-1 ( $\delta$ 33.15), C-10 ( $\delta$ 118.92), C-19 ( $\delta$ 147.36)                                                                                                                                                            |
| H-i ( $\delta$ 7.67)                                          | C-15 ( $\delta$ 131.07) | C-11 ( $\delta$ 124.59), C-14 ( $\delta$ 130.46)                                                                                                                                                                                   |
| H-j ( $\delta$ 7.83)                                          | C-16 ( $\delta$ 134.71) | C-13 ( $\delta$ 129.65), C-12 ( $\delta$ 128.54)                                                                                                                                                                                   |
| H-k ( $\delta$ 7.99)                                          | C-12 ( $\delta$ 128.54) | C-16 ( $\delta$ 134.72), C-13 ( $\delta$ 129.65) & C-25 ( $\delta$<br>178.67)                                                                                                                                                      |
| H-l ( $\delta$ 8.50)                                          | C-11 ( $\delta$ 124.59) | C-18 ( $\delta$ 145.7), C-14 ( $\delta$ 130.46) & C-15 ( $\delta$ 131.07)                                                                                                                                                          |

Figure S11: HSQC spectrum of Compound 6e.

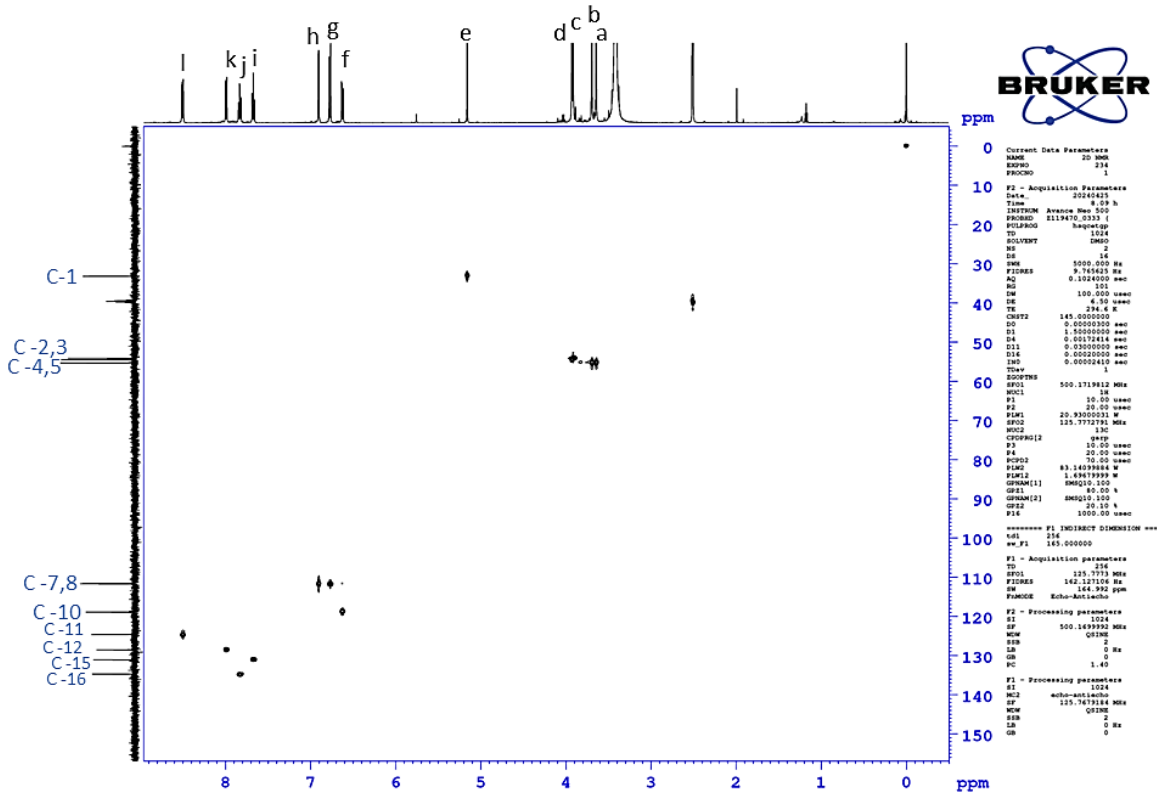

Figure S12: HMBC spectrum of Compound 6e.

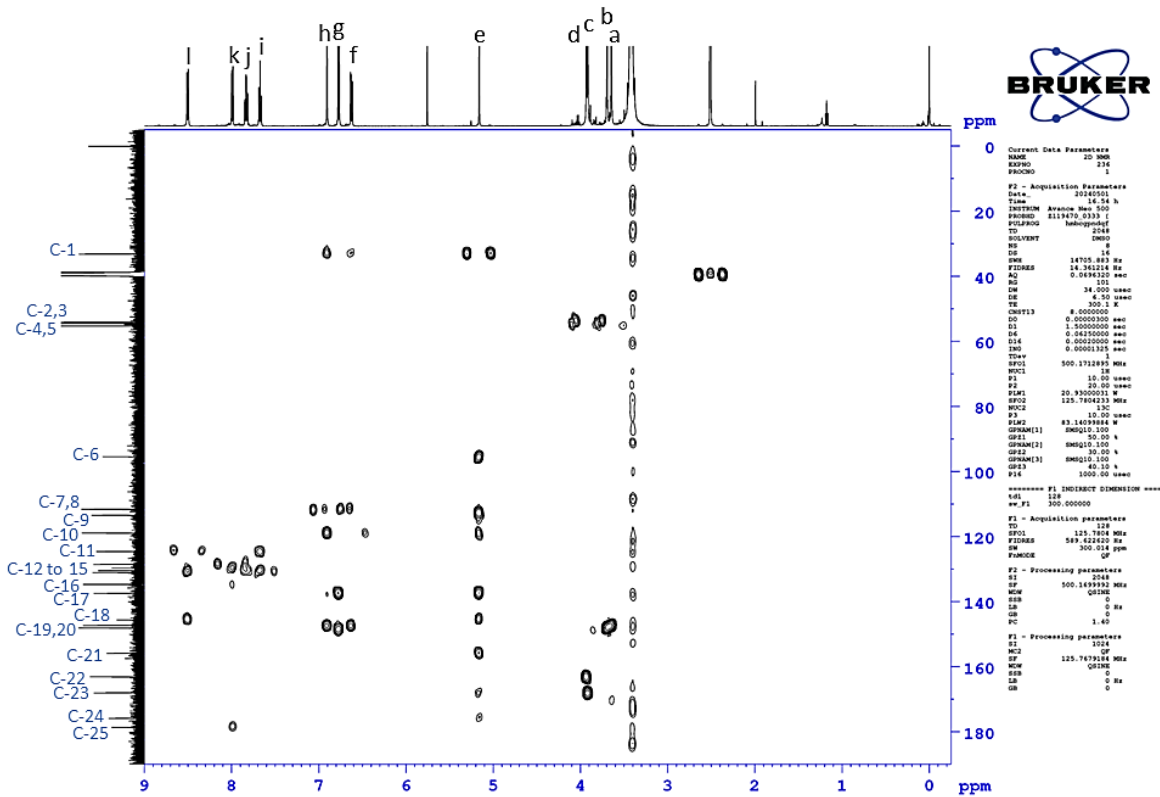

Figure S13:  $^1\text{H-NMR}$  (400 MHz,  $\text{DMSO-d}_6$ ) of Compound 6a.

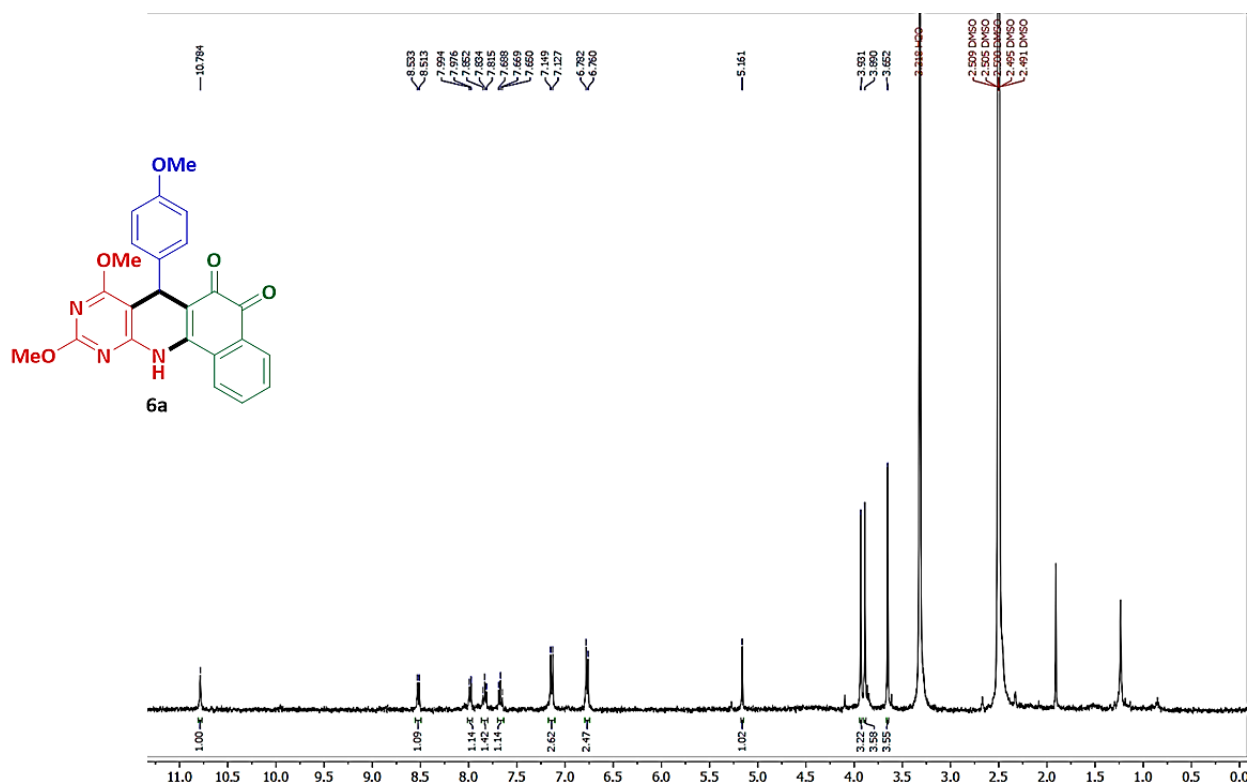

Figure S14:  $^{13}\text{C-NMR}$  (100 MHz,  $\text{DMSO-d}_6$ ) of Compound 6a.

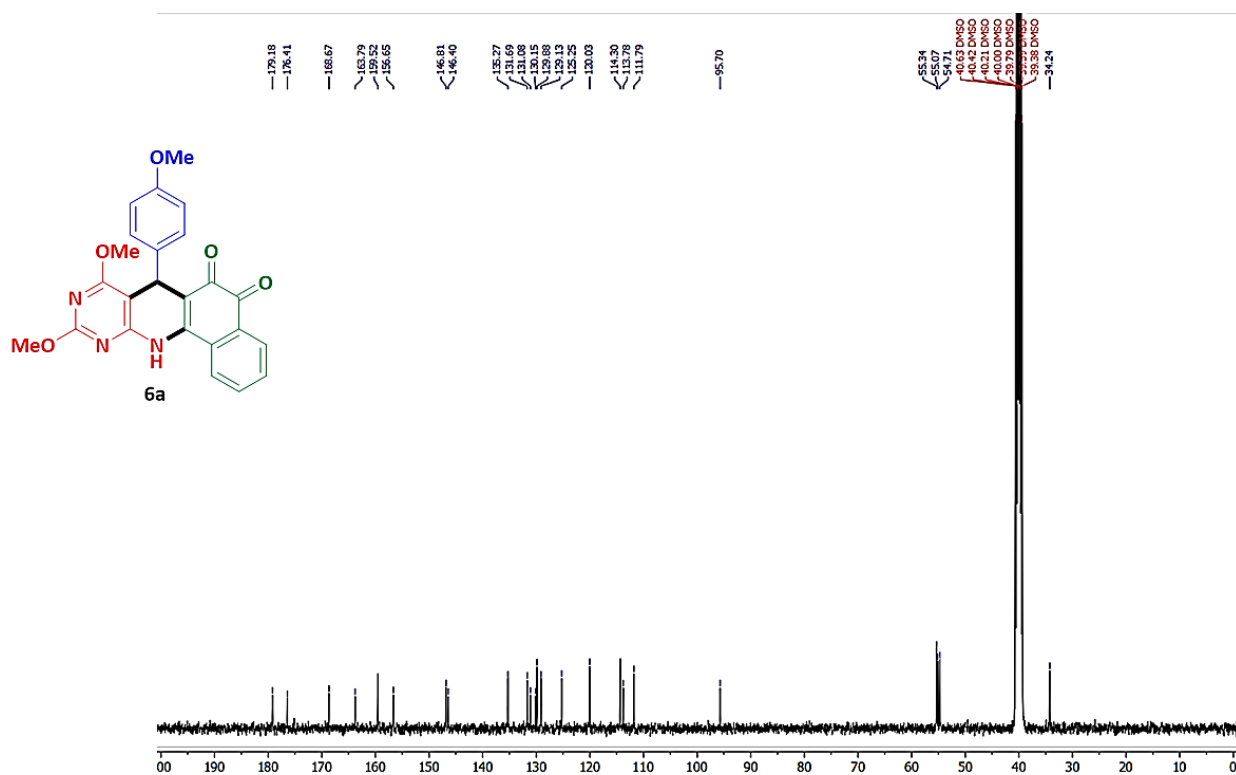

Figure S15:  $^1\text{H-NMR}$  (400 MHz,  $\text{DMSO-d}_6$ ) of Compound **5b**.

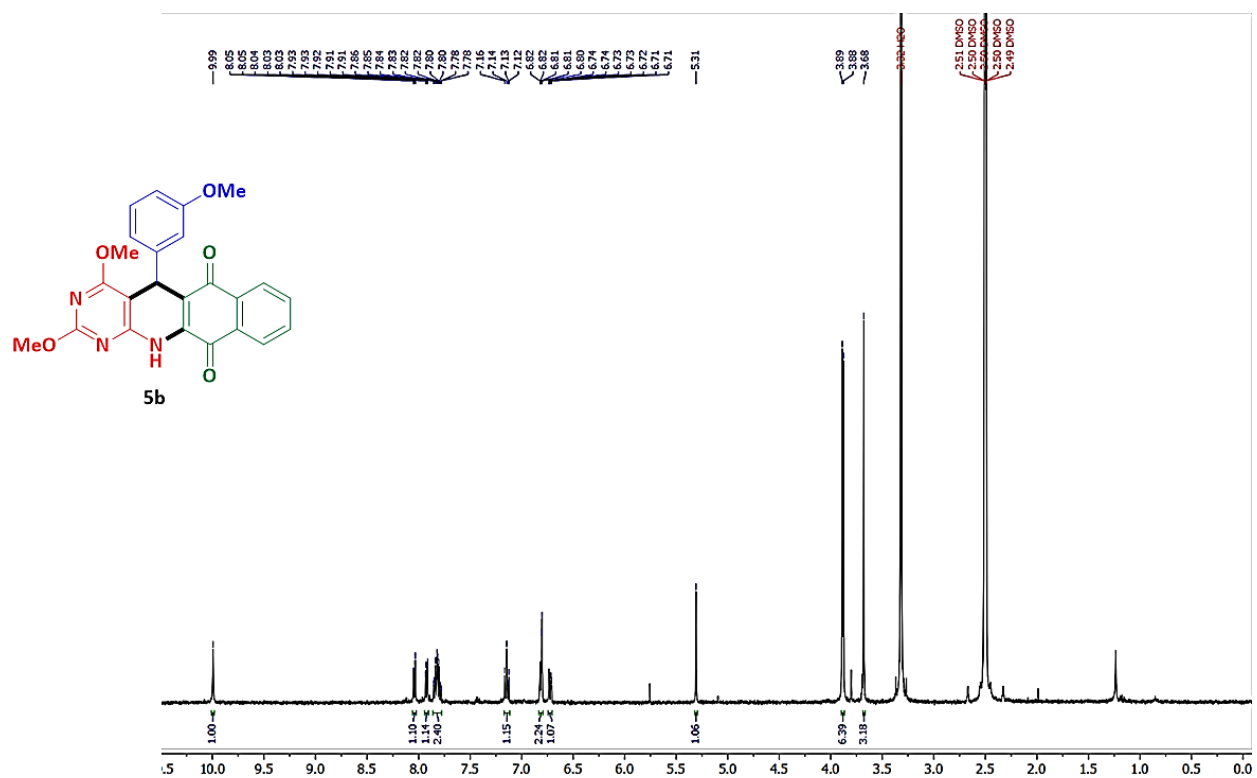

Figure S16:  $^{13}\text{C-NMR}$  (100 MHz,  $\text{DMSO-d}_6$ ) of Compound **5b**.

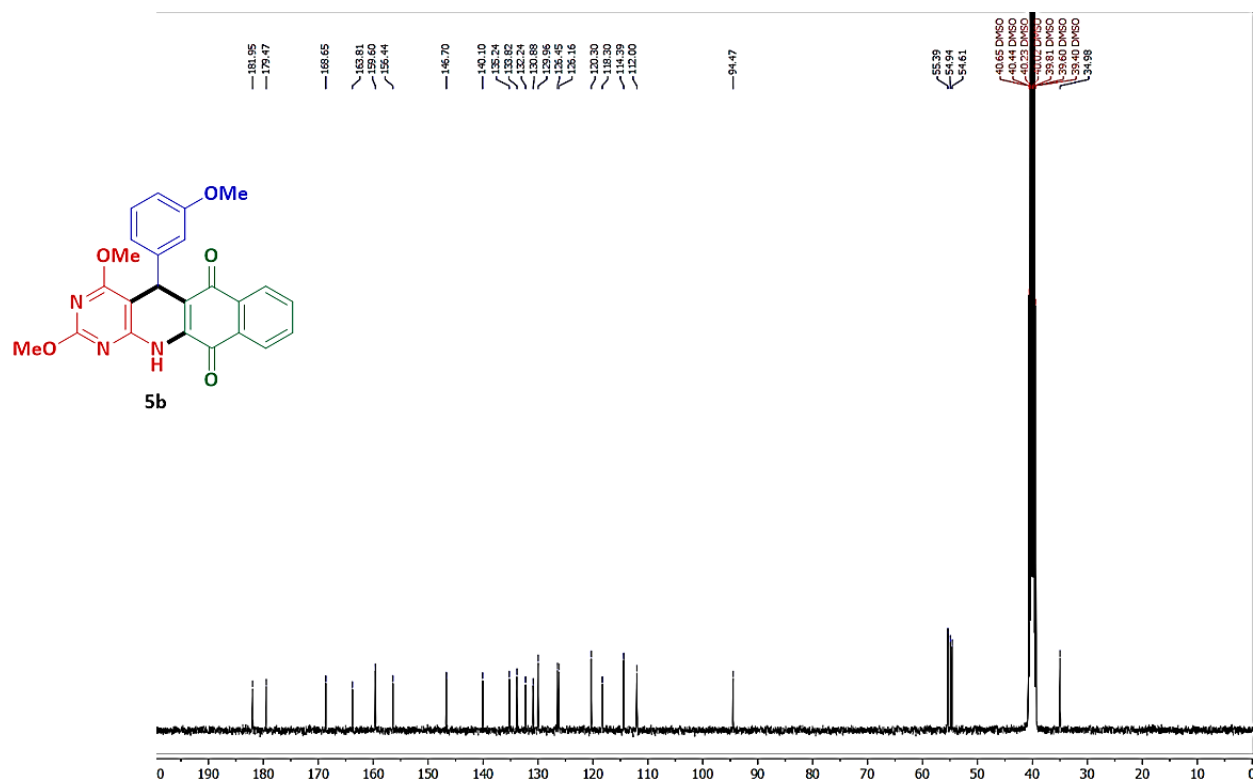

Figure S17:  $^1\text{H-NMR}$  (400 MHz,  $\text{DMSO-d}_6$ ) of Compound **6b**.

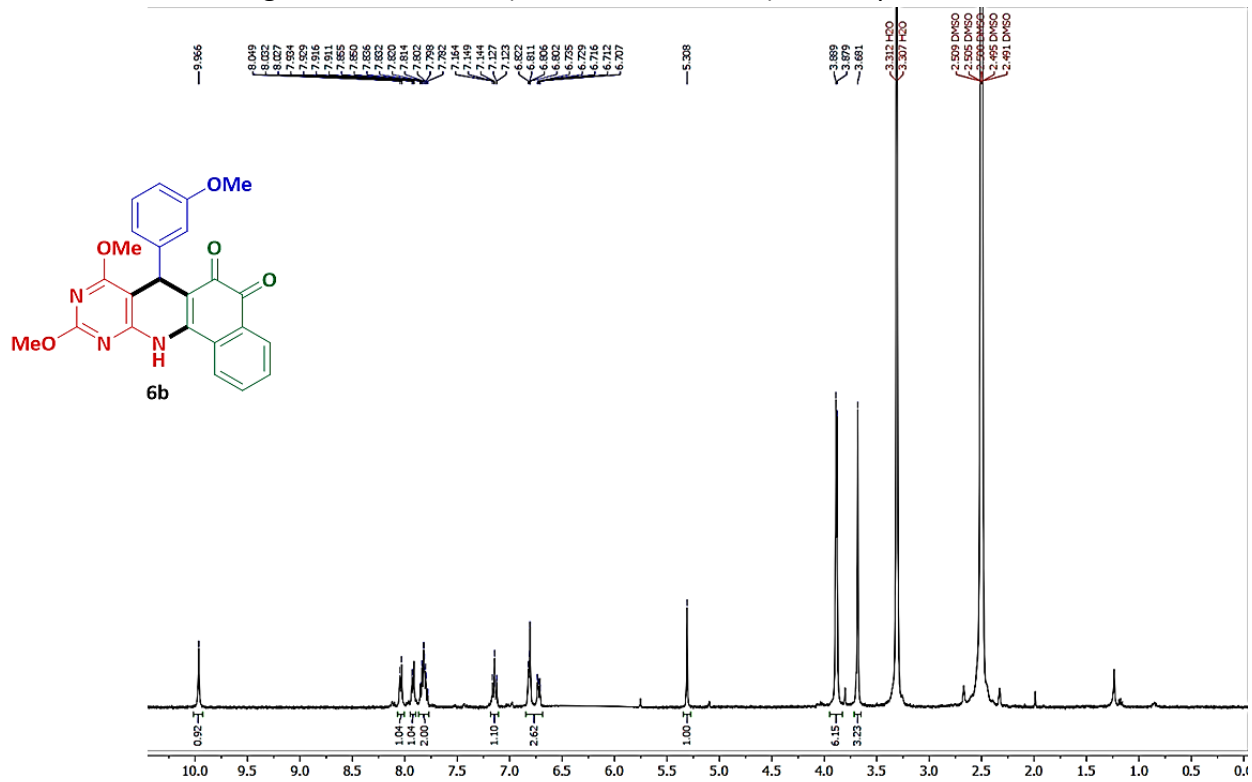

Figure S18:  $^{13}\text{C-NMR}$  (100 MHz,  $\text{DMSO-d}_6$ ) of Compound **6b**.

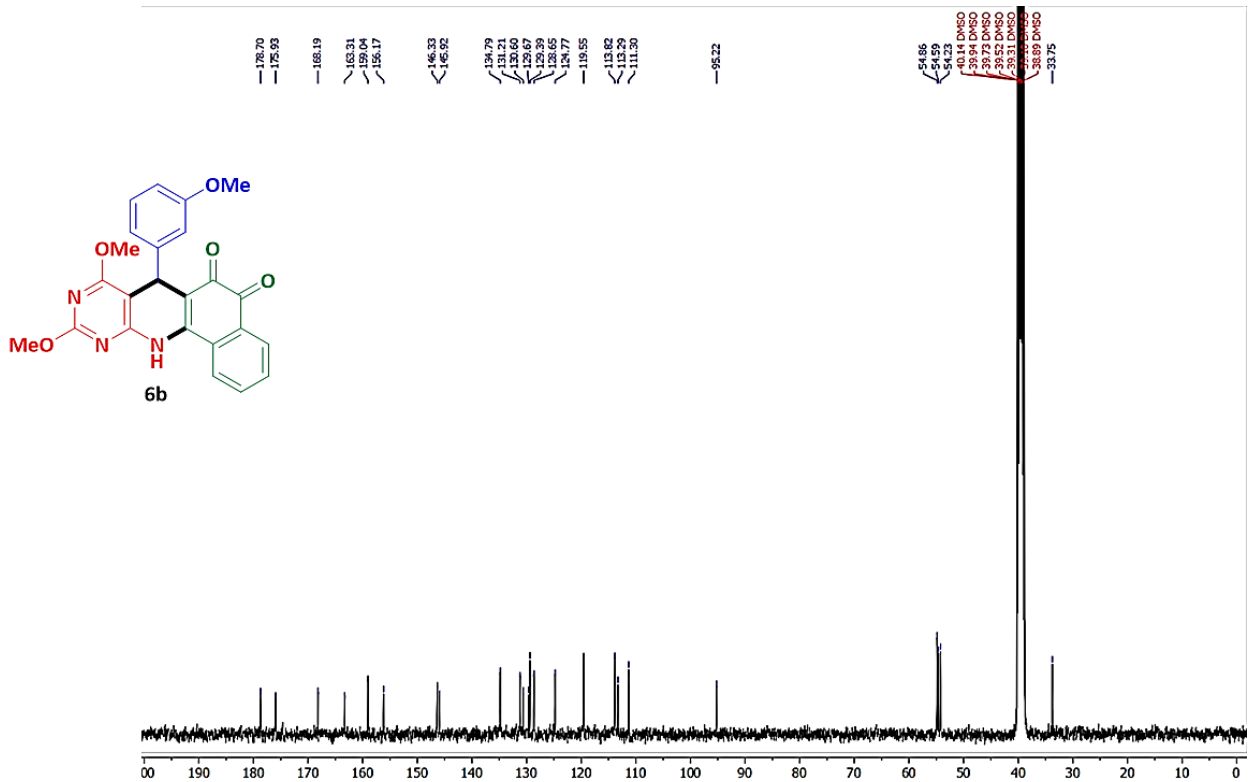

Figure S19: <sup>1</sup>H-NMR (400 MHz, DMSO-d<sub>6</sub>) of Compound 5c.

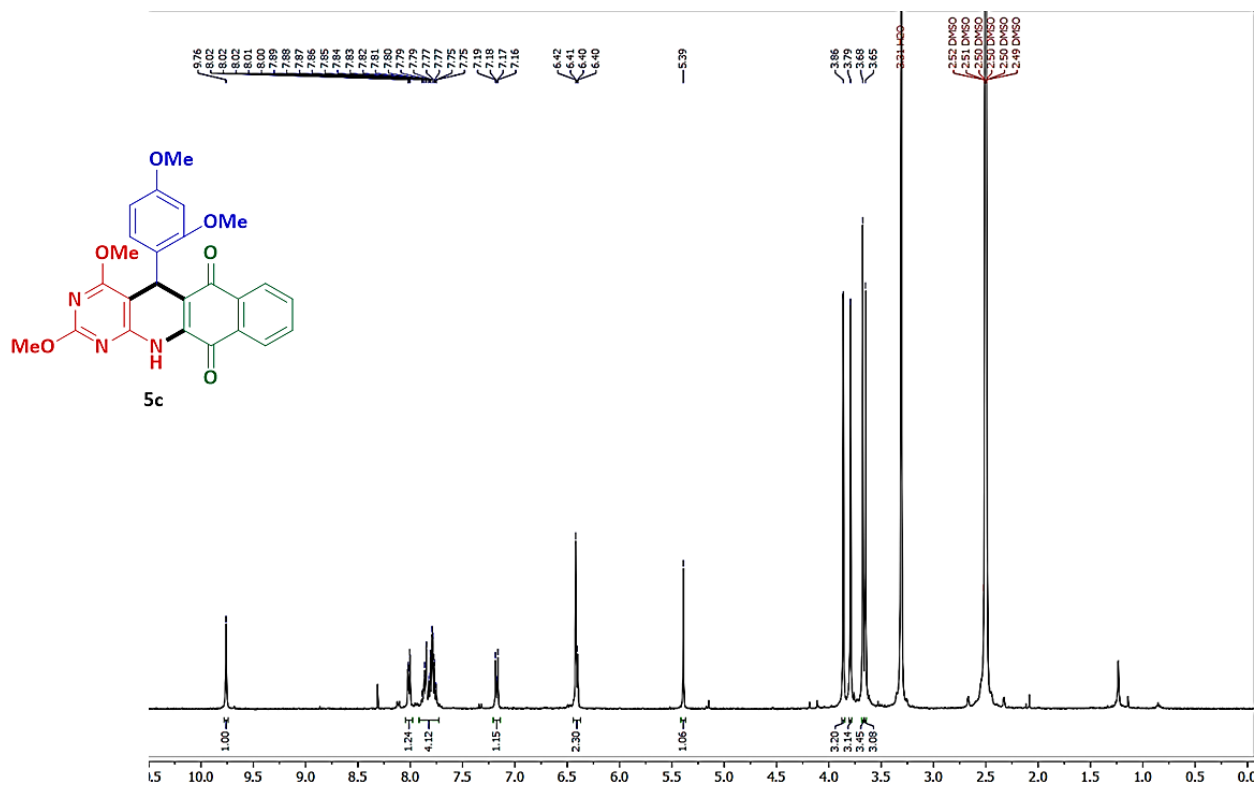

Figure S20: <sup>13</sup>C-NMR (100 MHz, DMSO-d<sub>6</sub>) of Compound 5c.

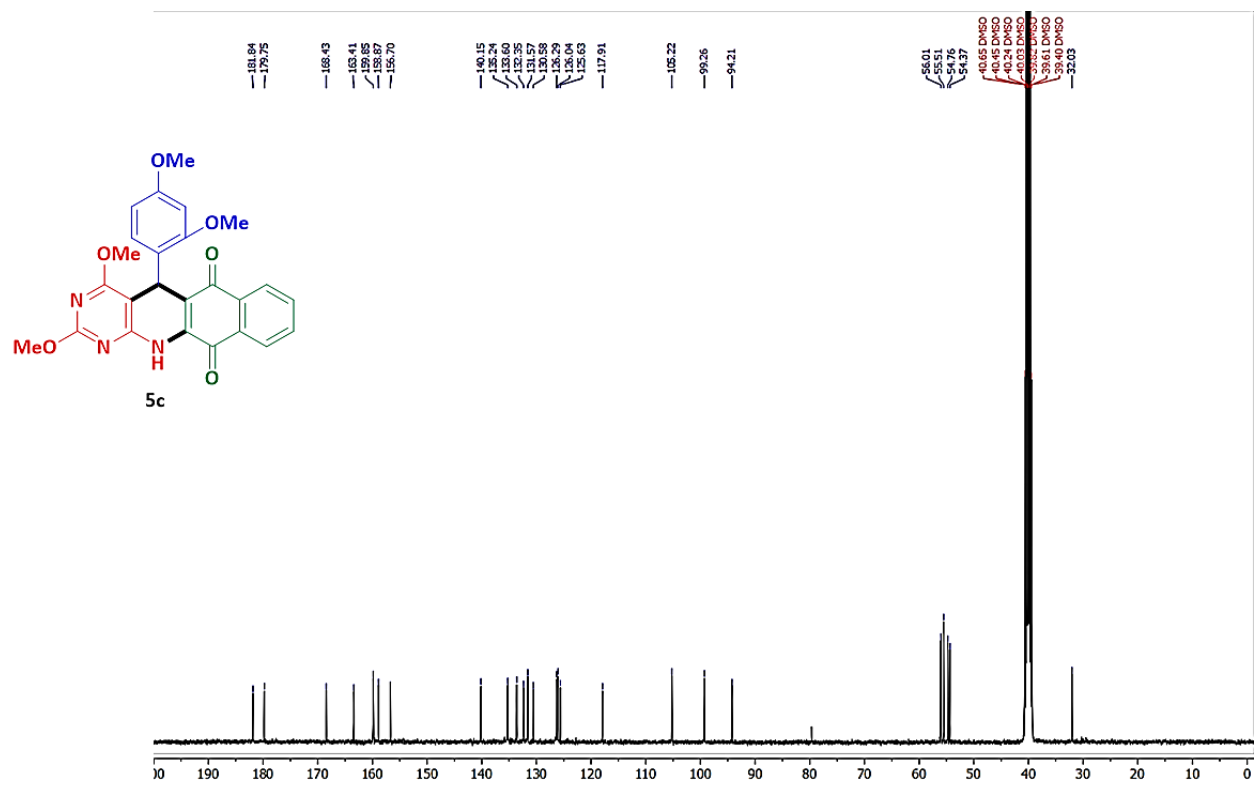

Figure S21:  $^1\text{H-NMR}$  (400 MHz,  $\text{DMSO-d}_6$ ) of Compound 6c.

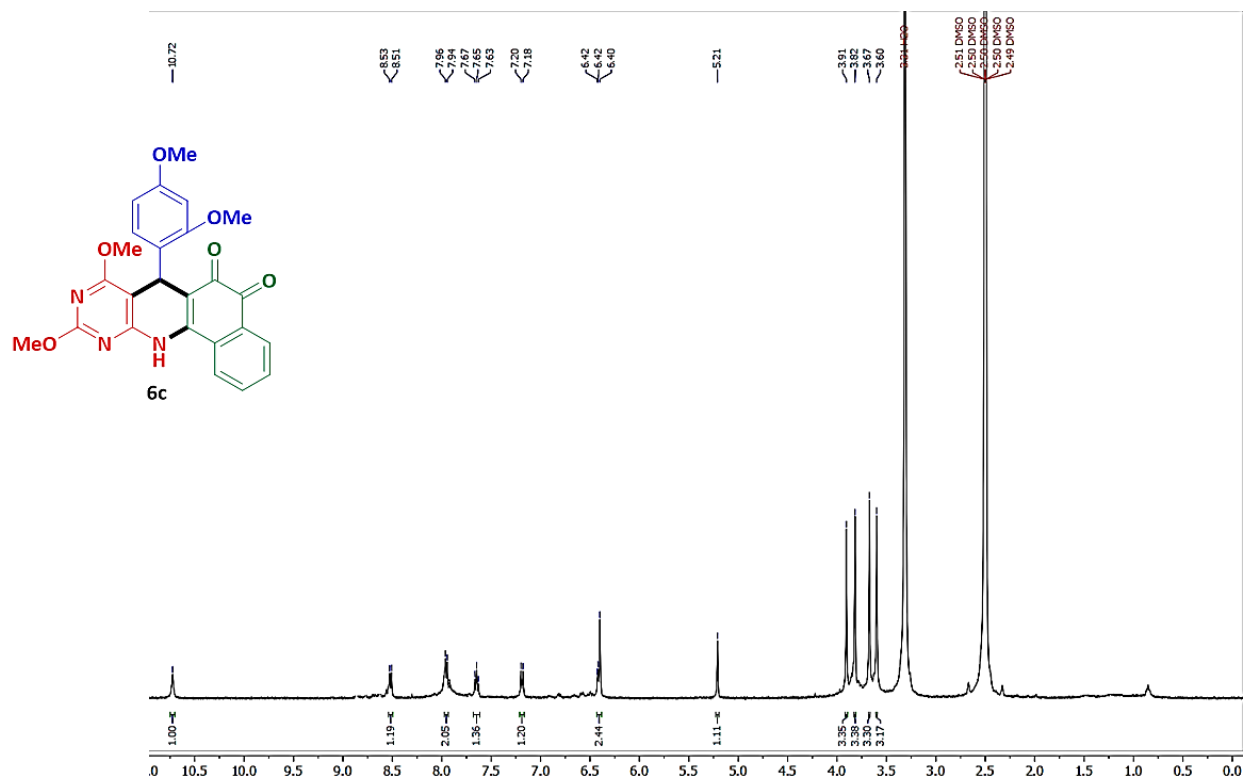

Figure S22:  $^{13}\text{C-NMR}$  (100 MHz,  $\text{DMSO-d}_6$ ) of Compound 6c.

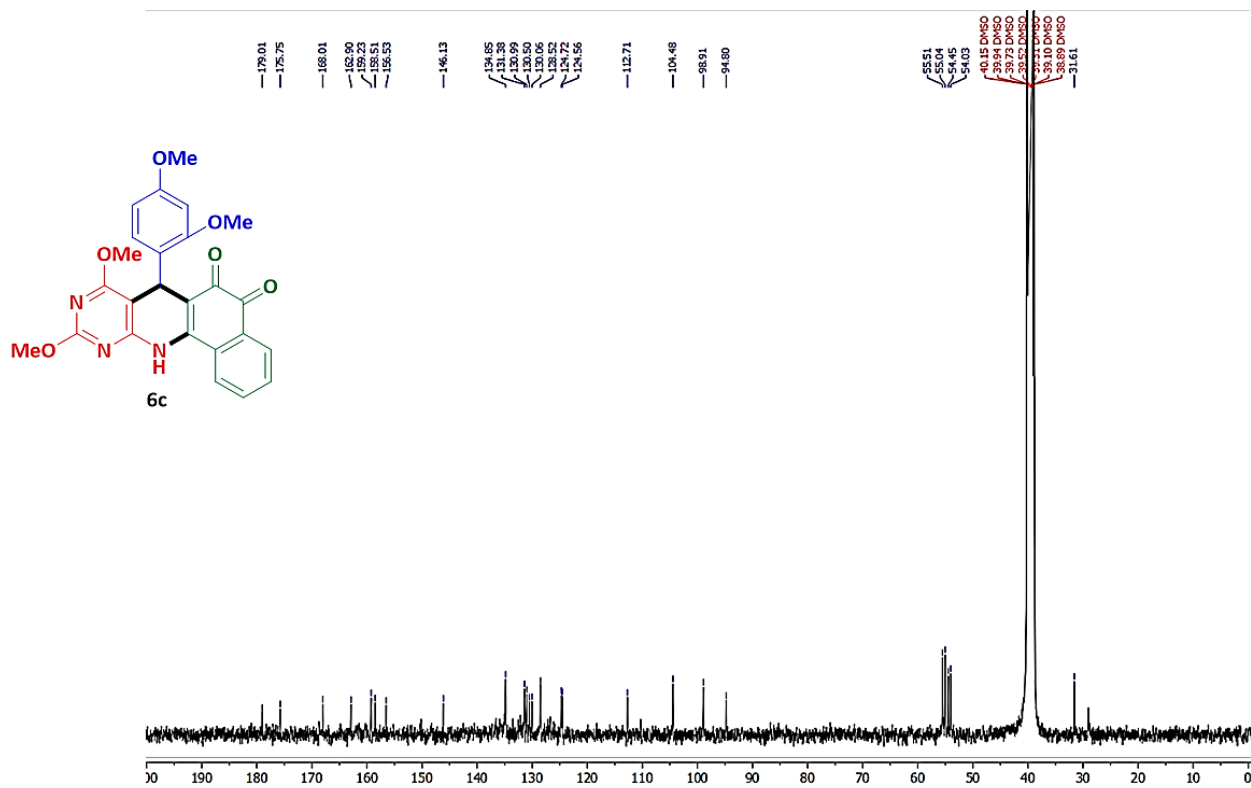

Figure S23:  $^1\text{H-NMR}$  (400 MHz,  $\text{DMSO-d}_6$ ) of Compound 5d.

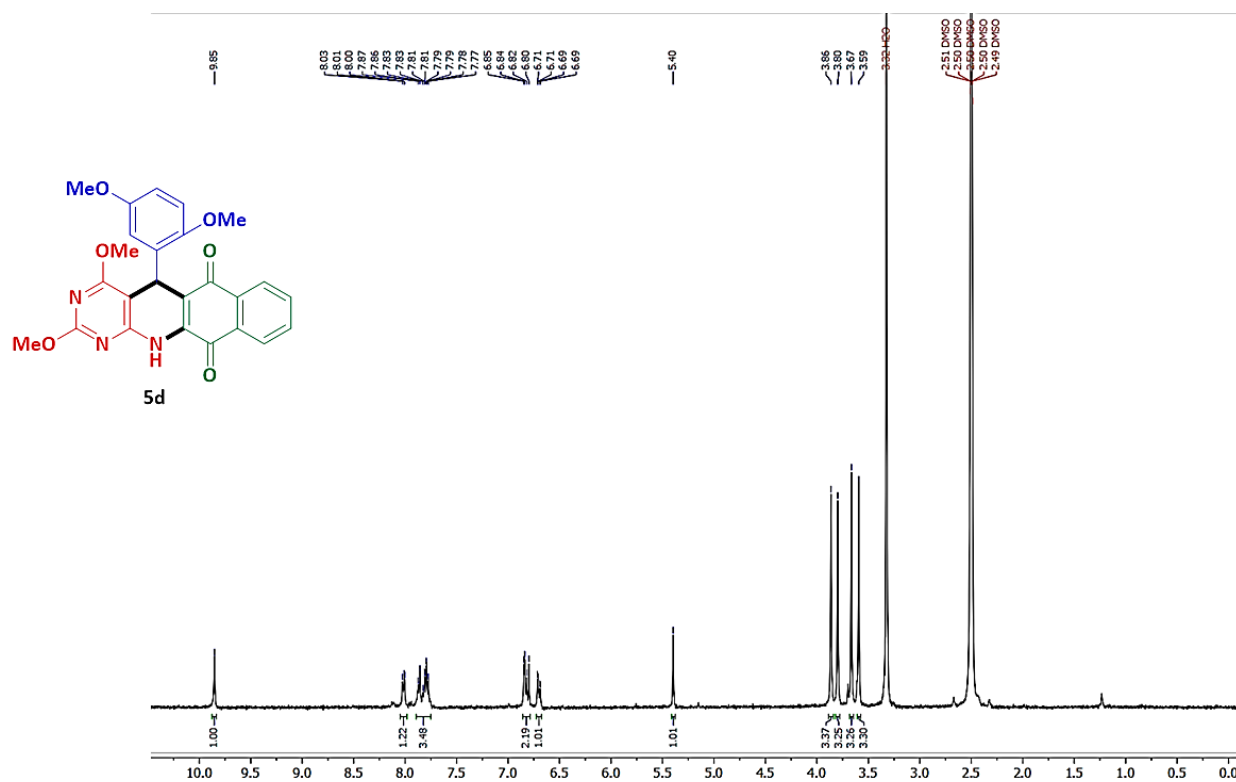

Figure S24:  $^{13}\text{C-NMR}$  (100 MHz,  $\text{DMSO-d}_6$ ) of Compound 5d.

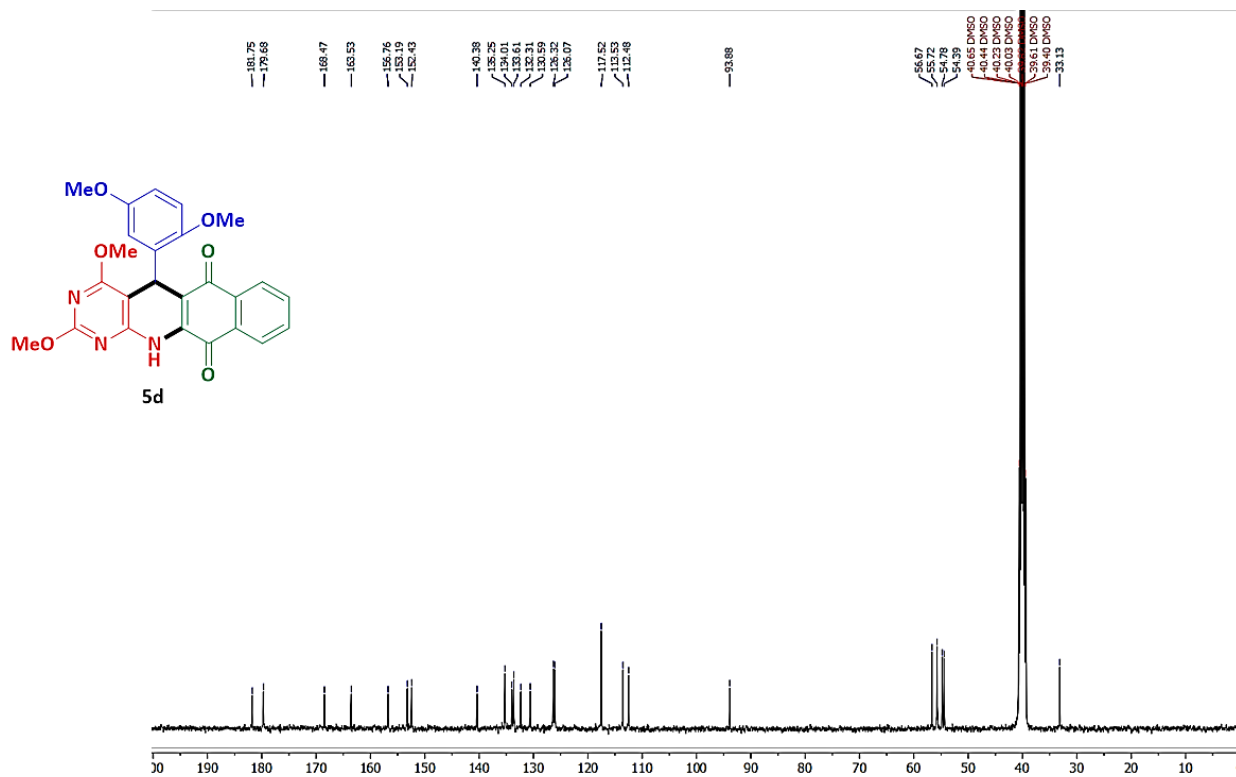



Figure S25: <sup>1</sup>H-NMR (400 MHz, DMSO-d<sub>6</sub>) of Compound 6d.

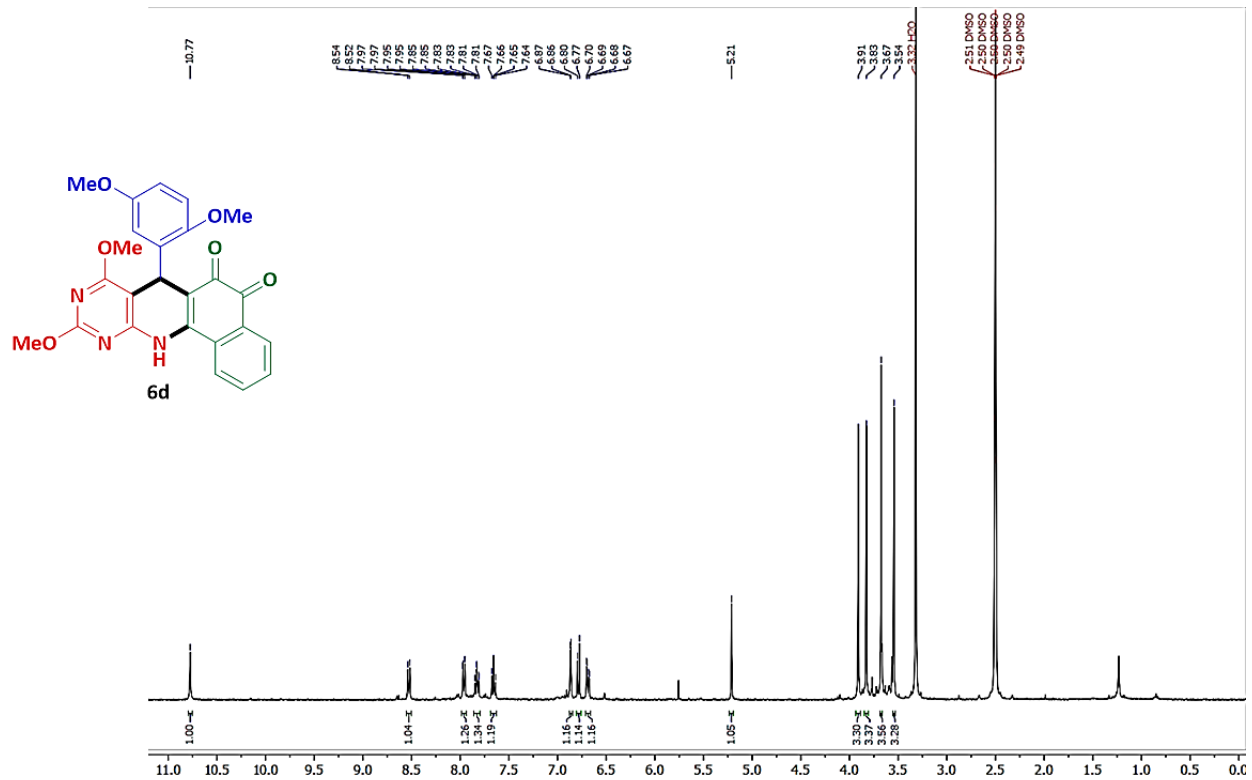

Figure S26: <sup>13</sup>C-NMR (100 MHz, DMSO-d<sub>6</sub>) of Compound 6d.

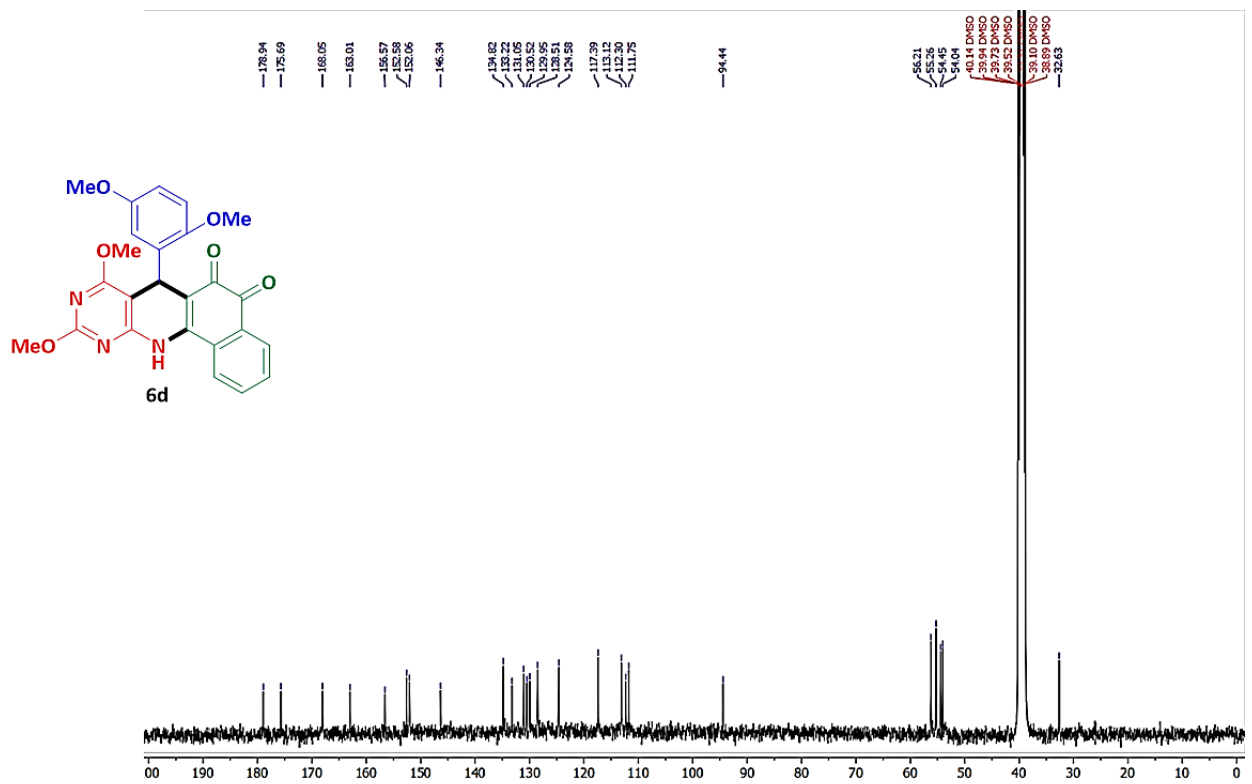

Figure S27:  $^1\text{H-NMR}$  (400 MHz,  $\text{DMSO-d}_6$ ) of Compound 5e.

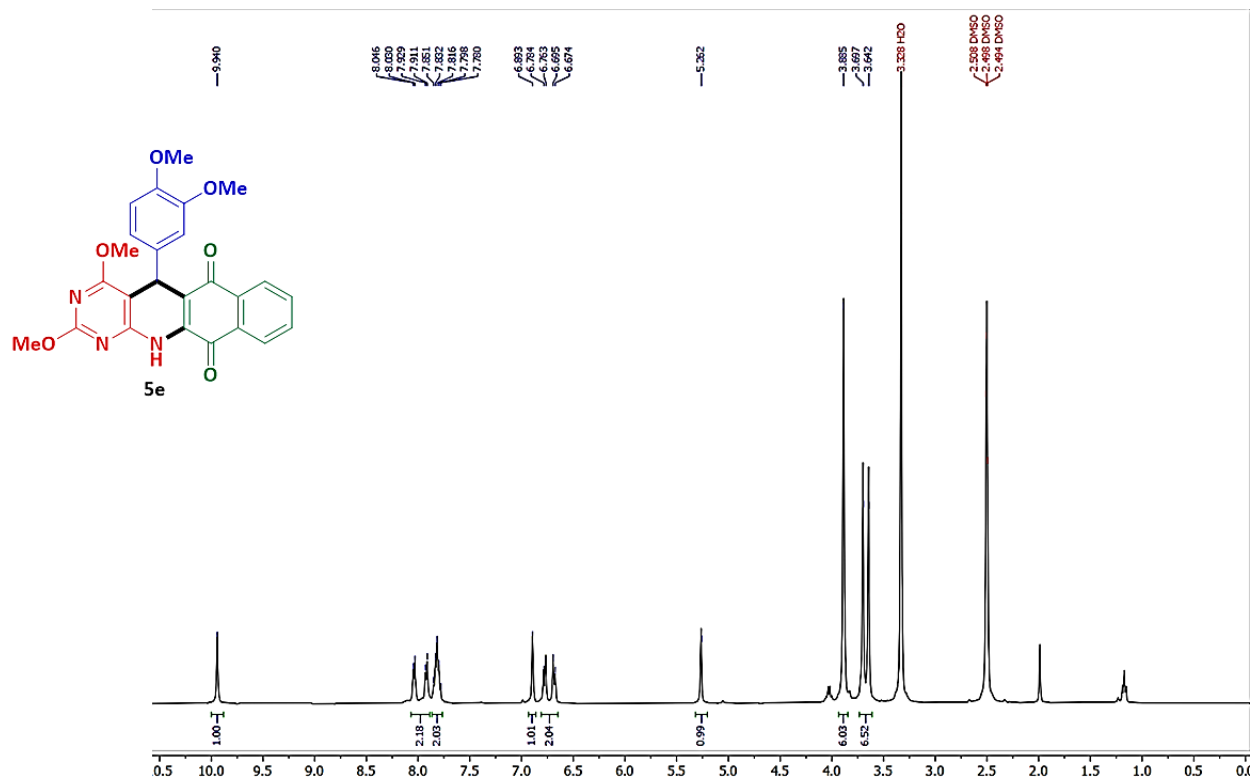

Figure S28:  $^{13}\text{C-NMR}$  (100 MHz,  $\text{DMSO-d}_6$ ) of Compound 5e.

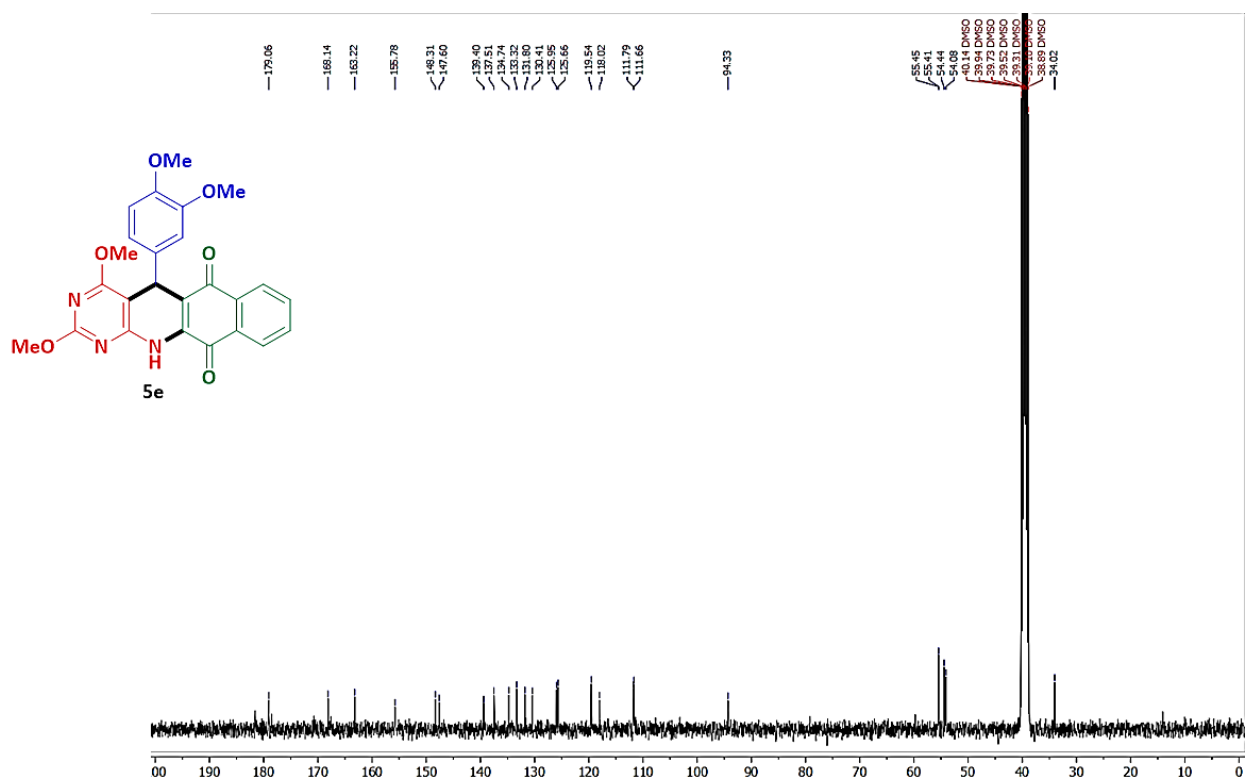

Figure S29: <sup>1</sup>H-NMR (500 MHz, DMSO-d<sub>6</sub>) of Compound 6e.

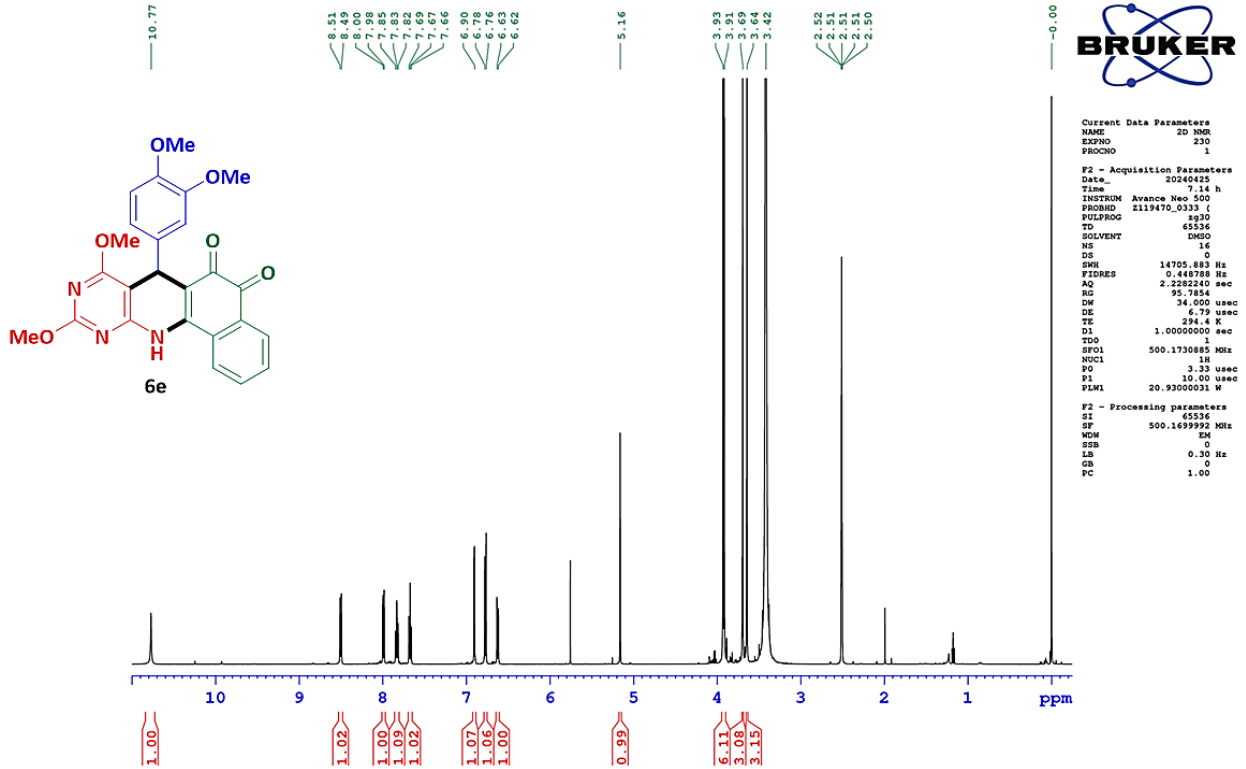

Figure S30: <sup>13</sup>C-NMR (125 MHz, DMSO-d<sub>6</sub>) of Compound 6e.

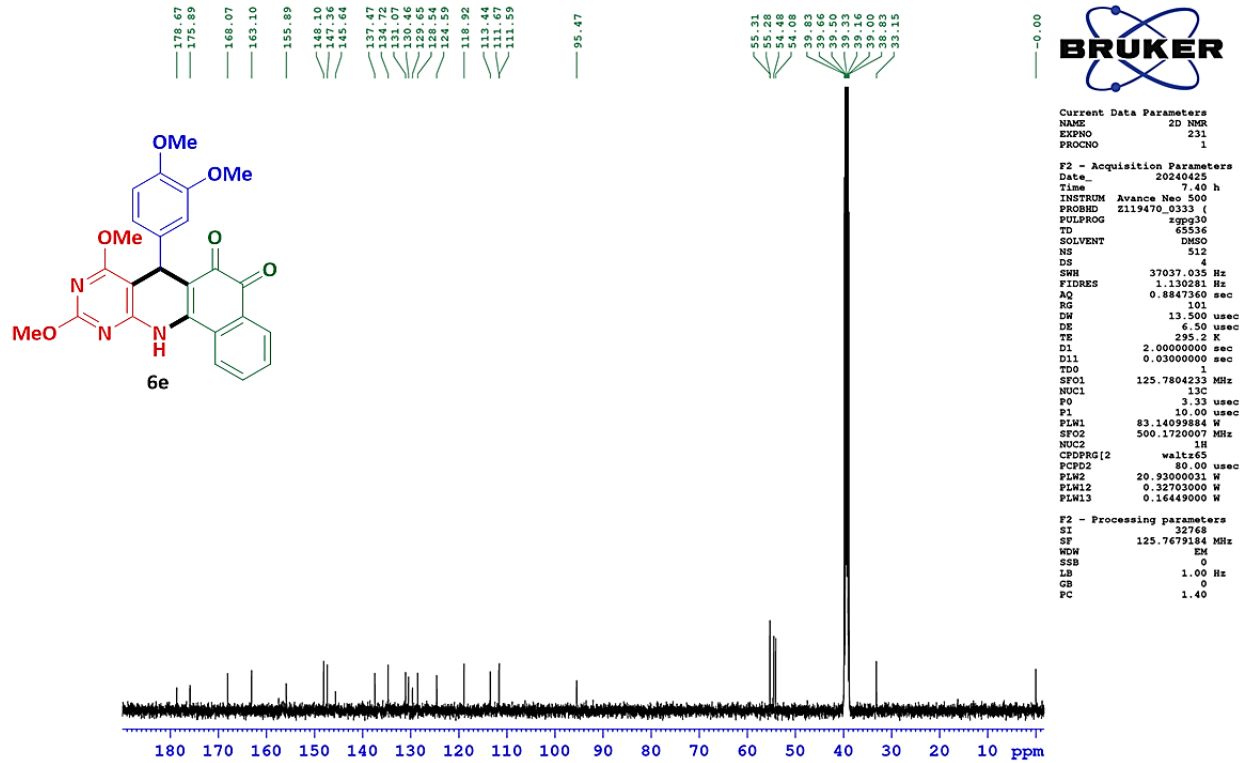

Figure S31:  $^1\text{H-NMR}$  (400 MHz,  $\text{DMSO-d}_6$ ) of Compound 5f.

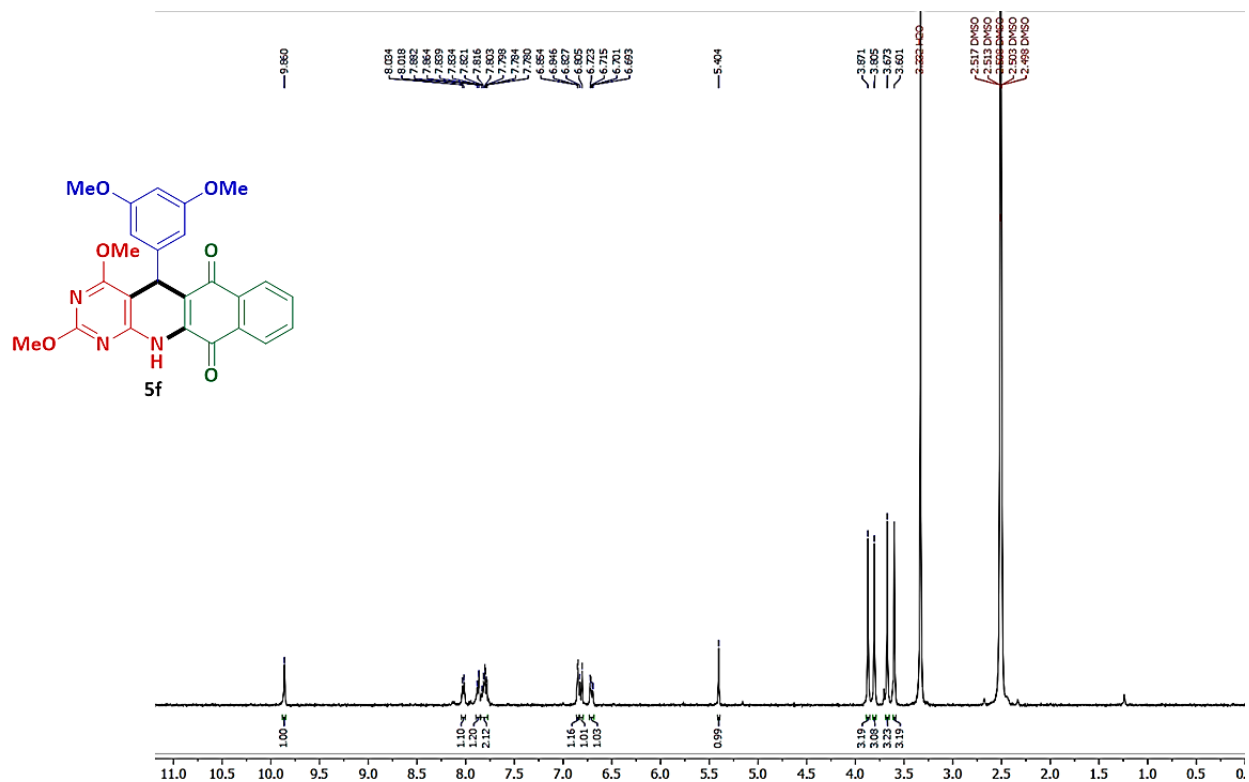

Figure S32:  $^{13}\text{C-NMR}$  (100 MHz,  $\text{DMSO-d}_6$ ) of Compound 5f.

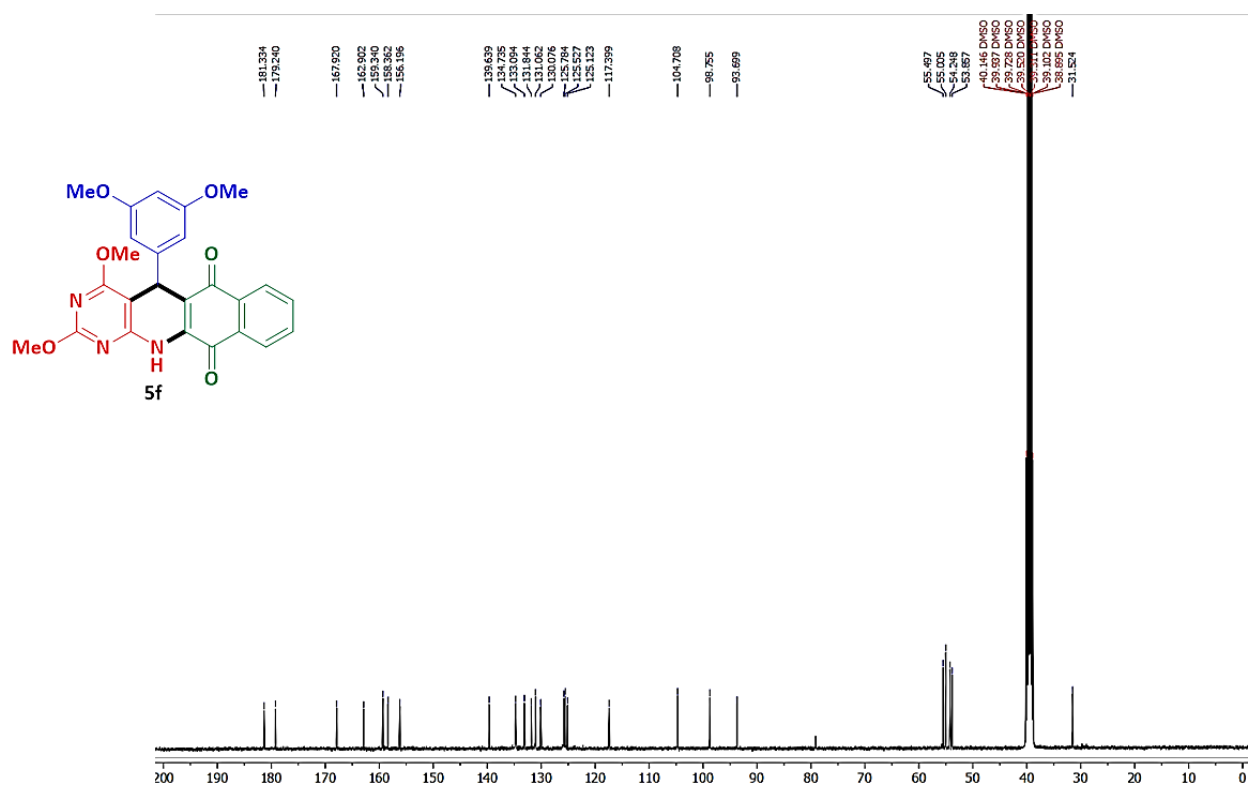

Figure S33:  $^1\text{H-NMR}$  (400 MHz,  $\text{DMSO-d}_6$ ) of Compound **6f**.

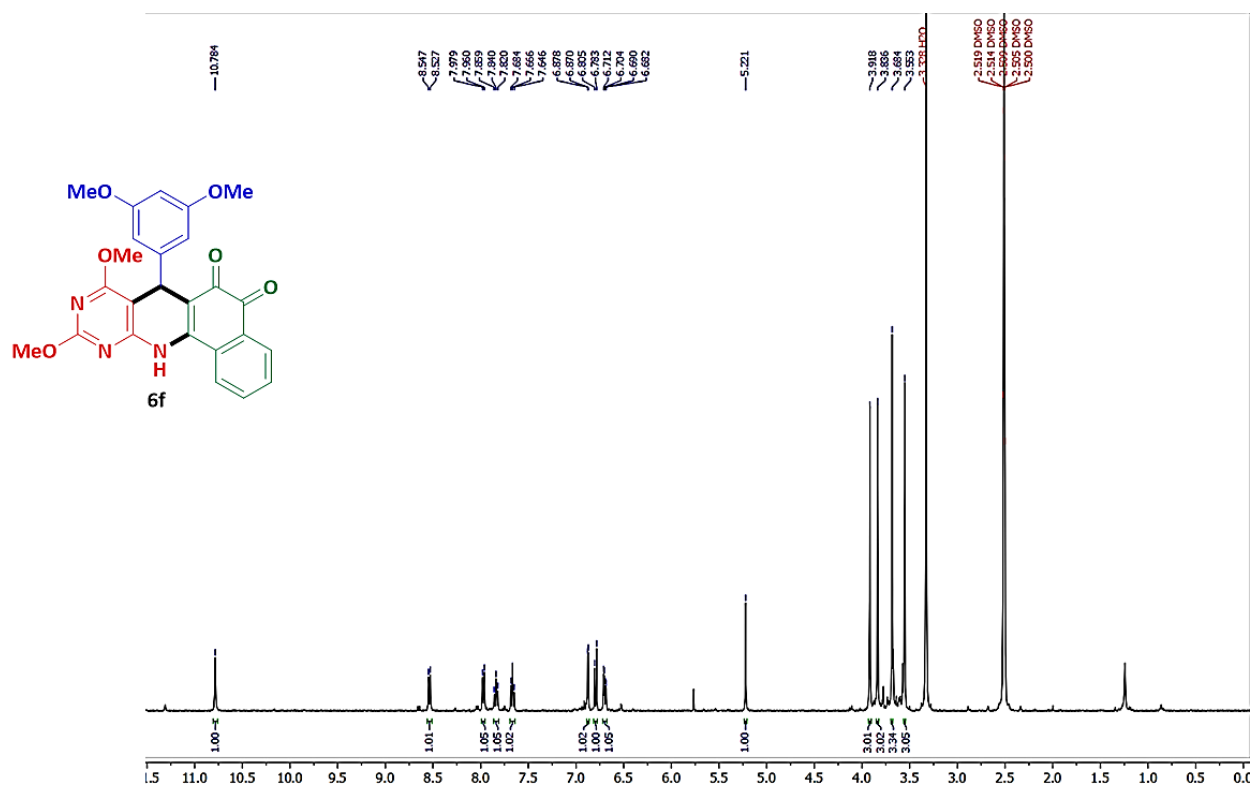

Figure S34:  $^{13}\text{C-NMR}$  (100 MHz,  $\text{DMSO-d}_6$ ) of Compound **6f**.

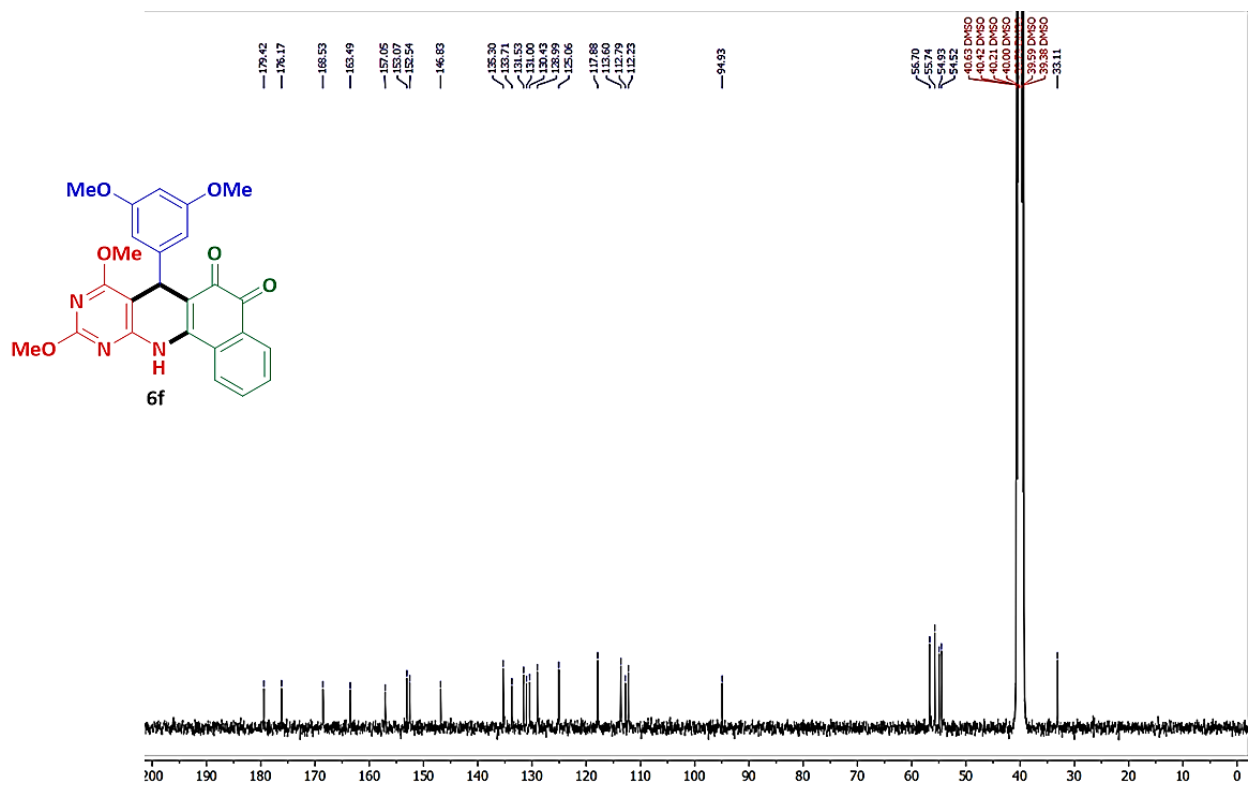

Figure S35:  $^1\text{H-NMR}$  (400 MHz,  $\text{DMSO-d}_6$ ) of Compound 5g.

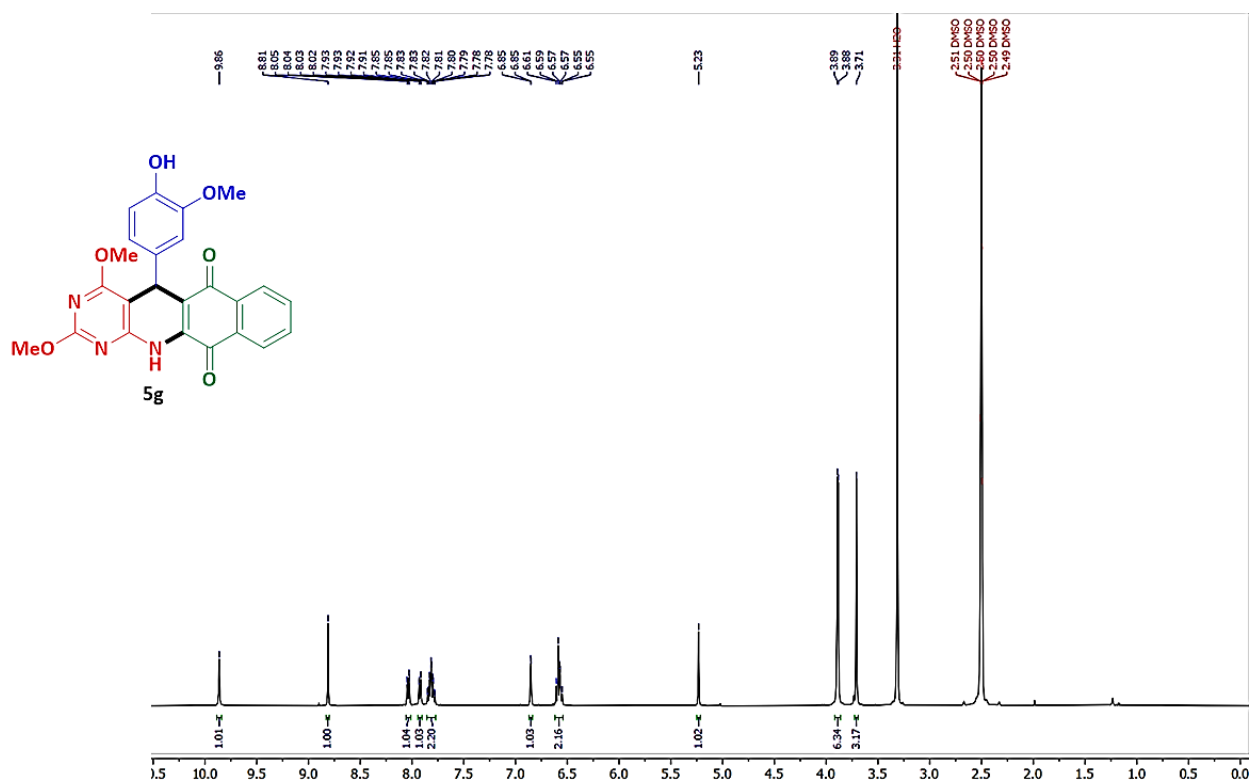

Figure S36:  $^{13}\text{C-NMR}$  (100 MHz,  $\text{DMSO-d}_6$ ) of Compound 5g.

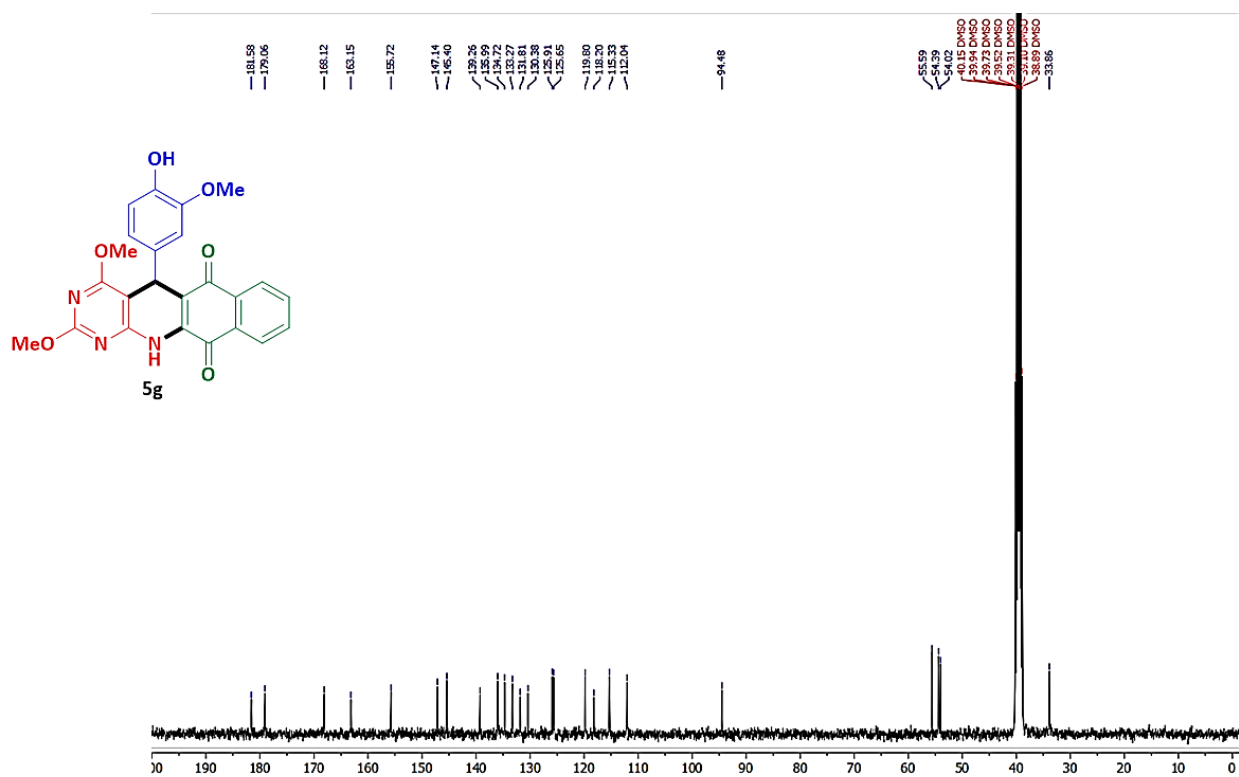

Figure S37:  $^1\text{H-NMR}$  (400 MHz,  $\text{DMSO-d}_6$ ) of Compound **6g**.

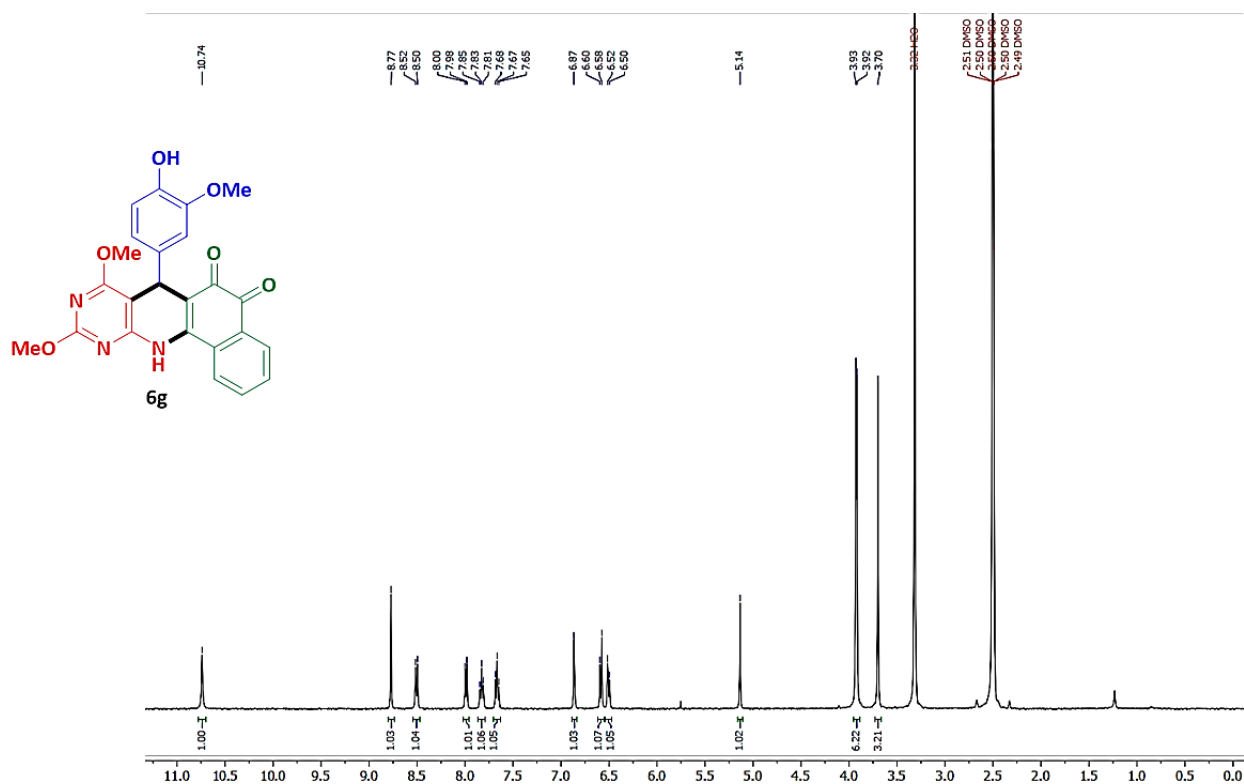

Figure S38:  $^{13}\text{C-NMR}$  (100 MHz,  $\text{DMSO-d}_6$ ) of Compound **6g**.

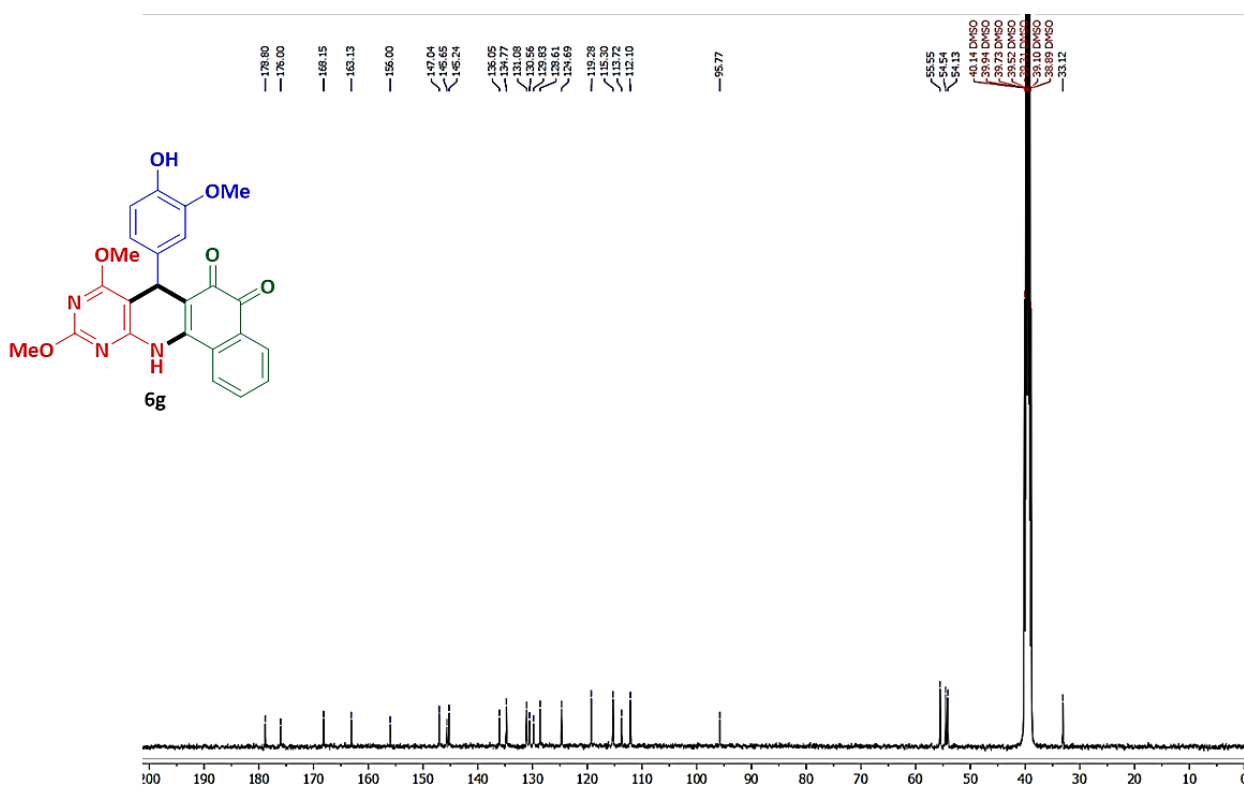

Figure S39:  $^1\text{H-NMR}$  (400 MHz,  $\text{DMSO-d}_6$ ) of Compound 5h.

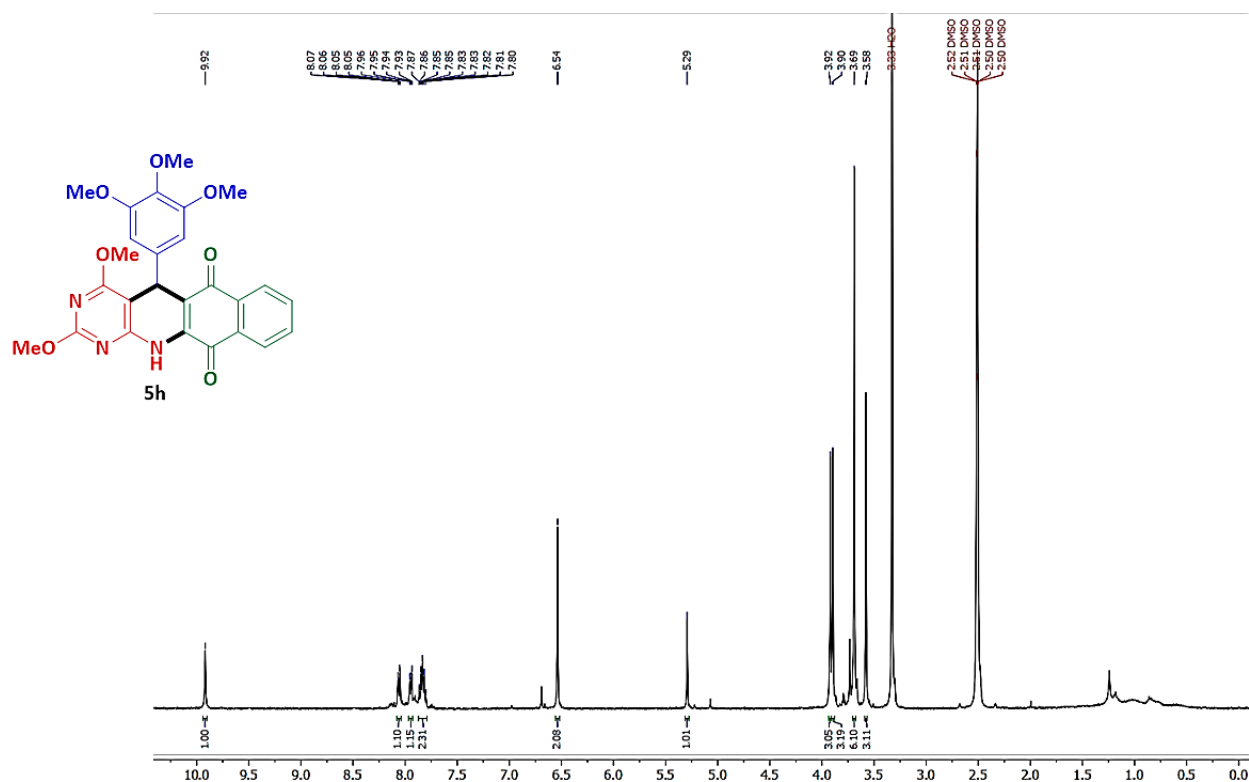

Figure S40:  $^{13}\text{C-NMR}$  (100 MHz,  $\text{DMSO-d}_6$ ) of Compound 5h.

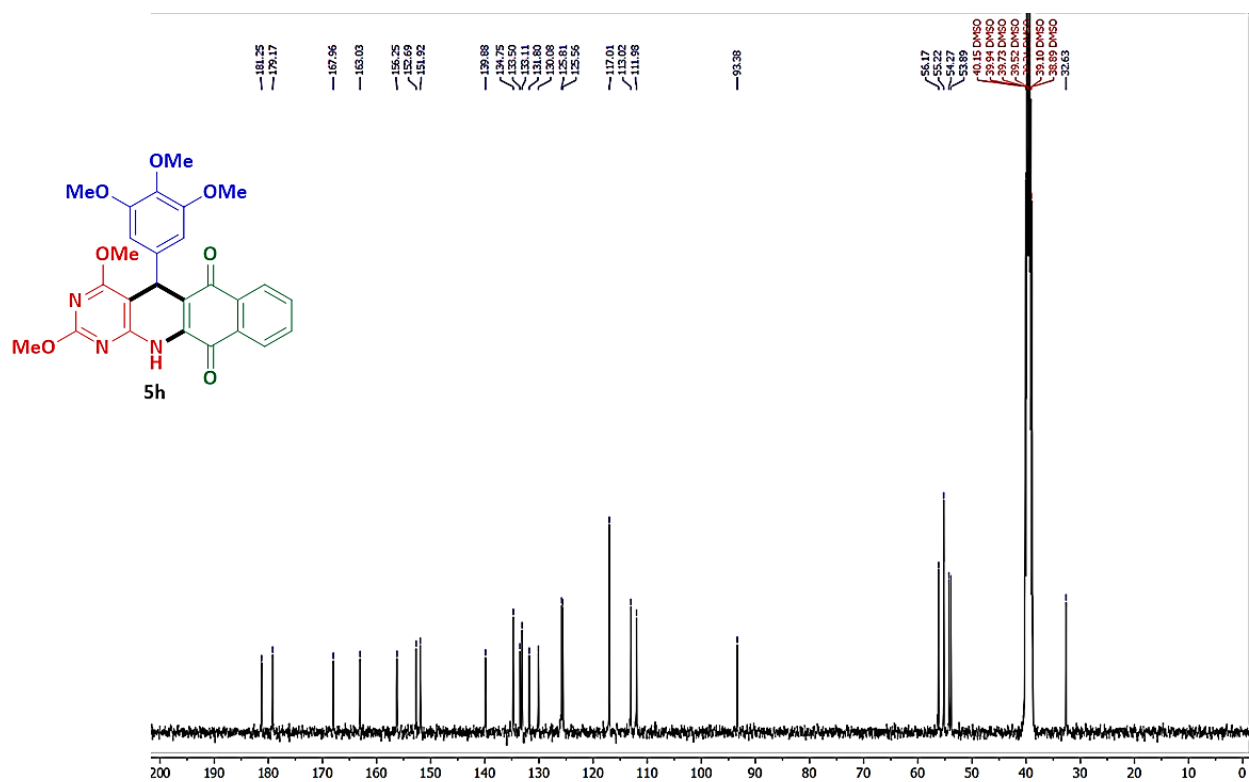



Figure S41:  $^1\text{H-NMR}$  (400 MHz,  $\text{DMSO-d}_6$ ) of Compound 6h.

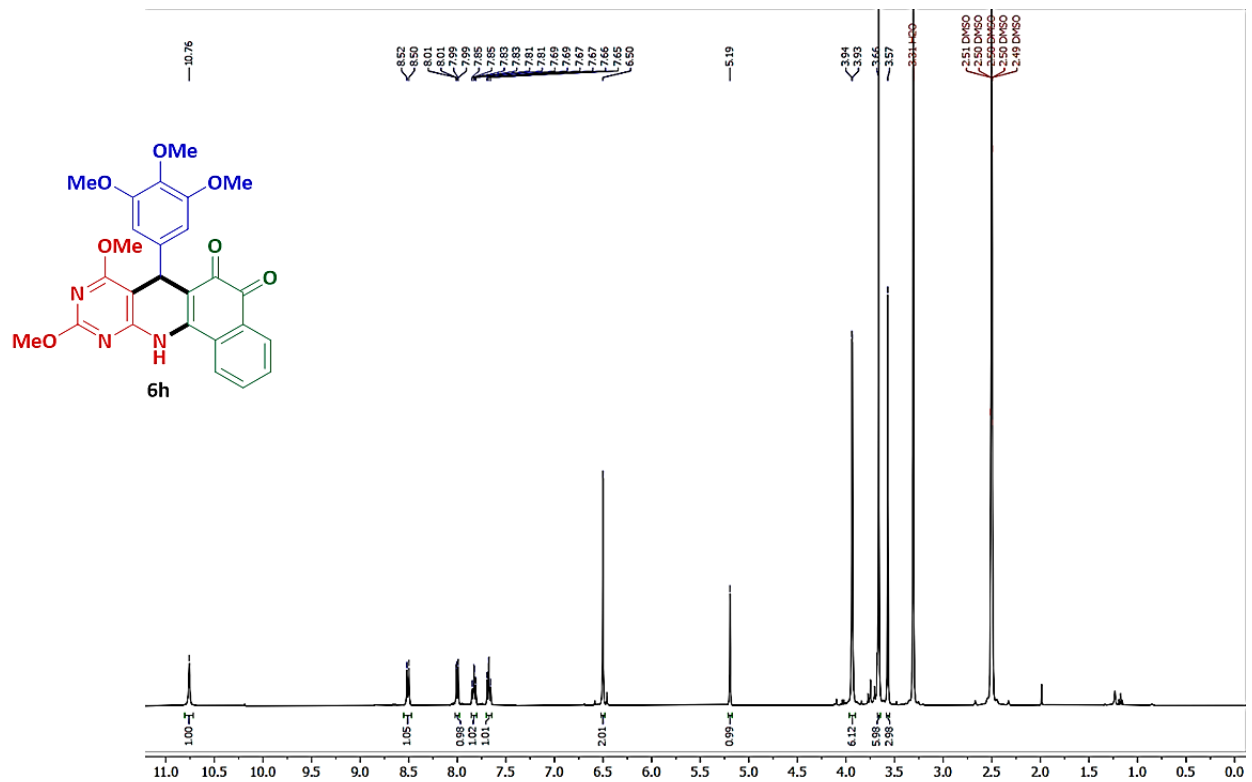

Figure S42:  $^{13}\text{C-NMR}$  (100 MHz,  $\text{DMSO-d}_6$ ) of Compound 6h.

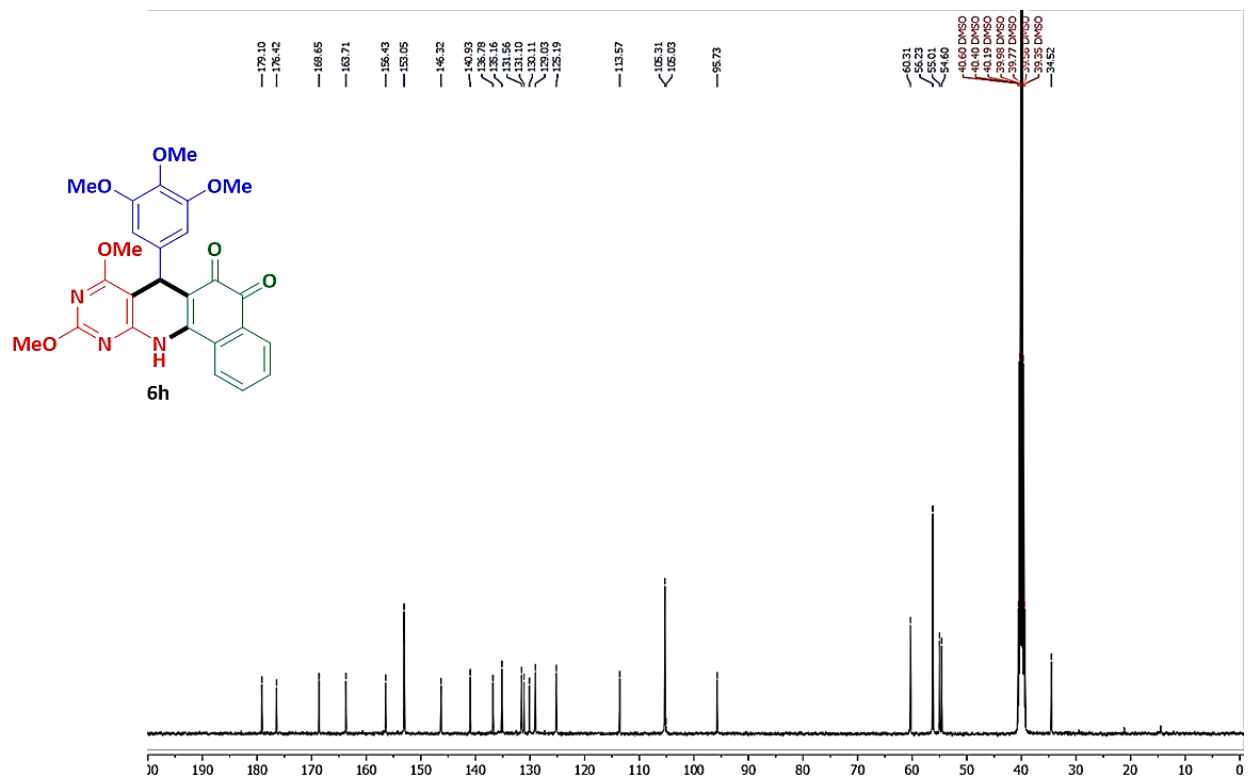

Figure S43:  $^1\text{H-NMR}$  (400 MHz,  $\text{DMSO-d}_6$ ) of Compound 5i.

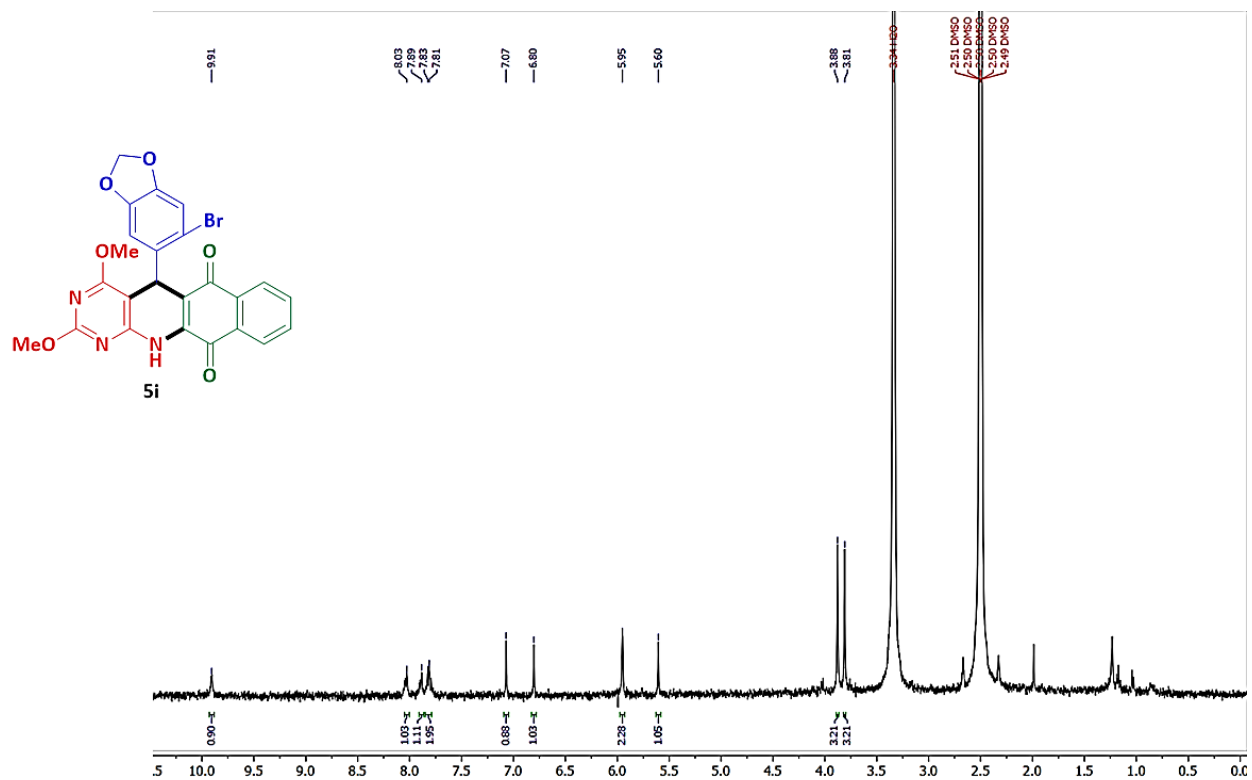

Figure S44:  $^{13}\text{C-NMR}$  (100 MHz,  $\text{DMSO-d}_6$ ) of Compound 5i.

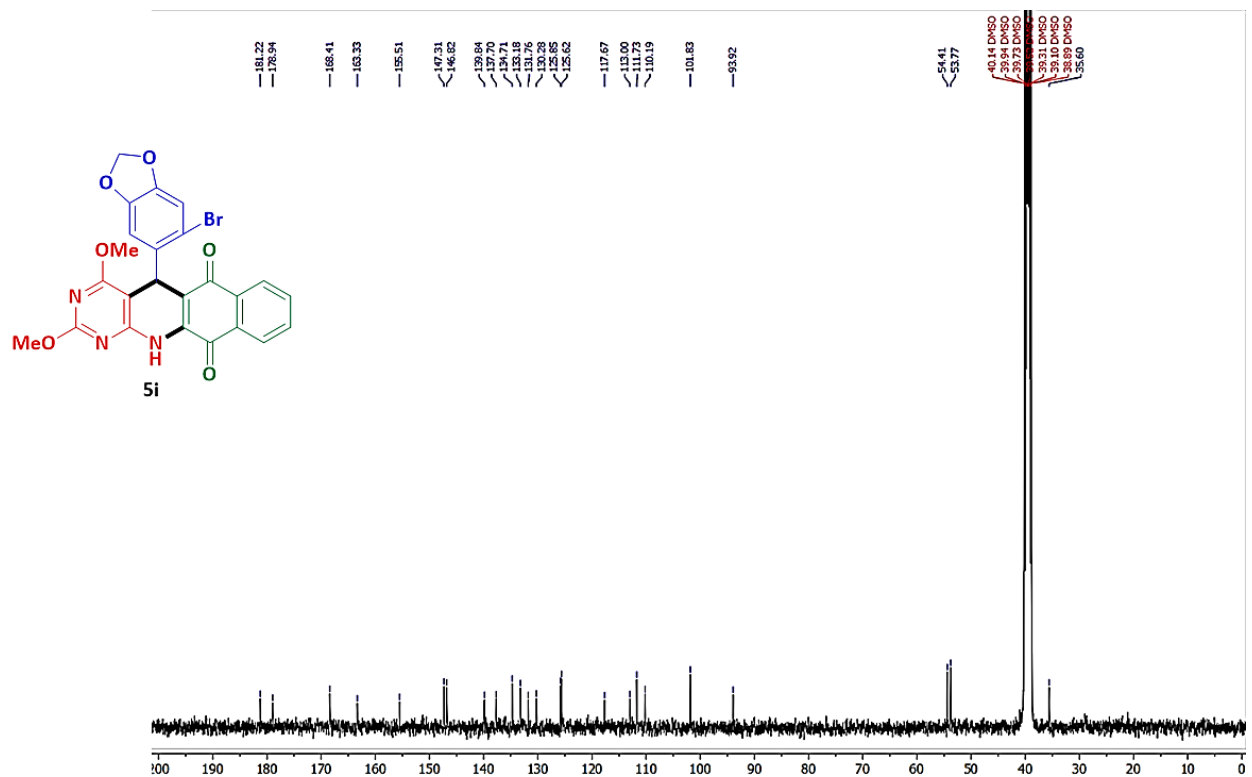

Figure S45:  $^1\text{H-NMR}$  (400 MHz,  $\text{DMSO-d}_6$ ) of Compound 6i.

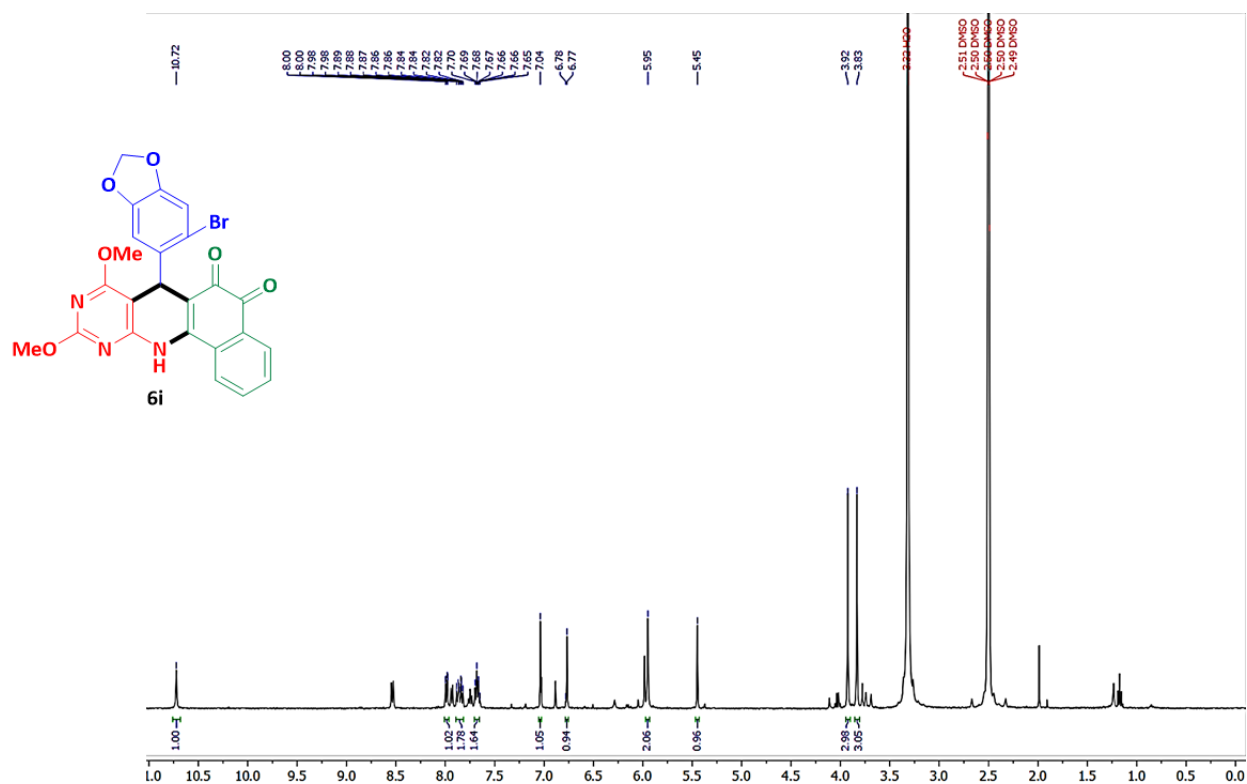

Figure S46:  $^{13}\text{C-NMR}$  (100 MHz,  $\text{DMSO-d}_6$ ) of Compound 6i.

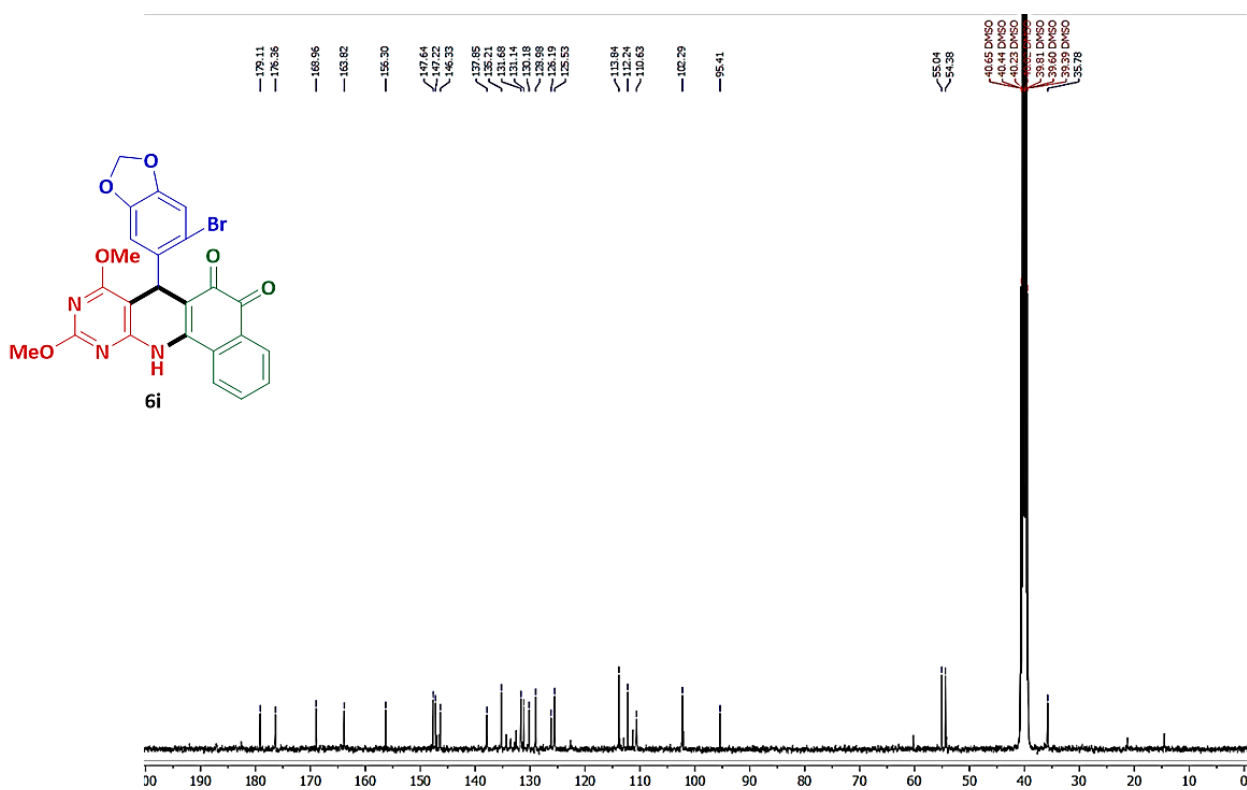

Figure S47:  $^1\text{H-NMR}$  (400 MHz,  $\text{DMSO-d}_6$ ) of Compound 5j.

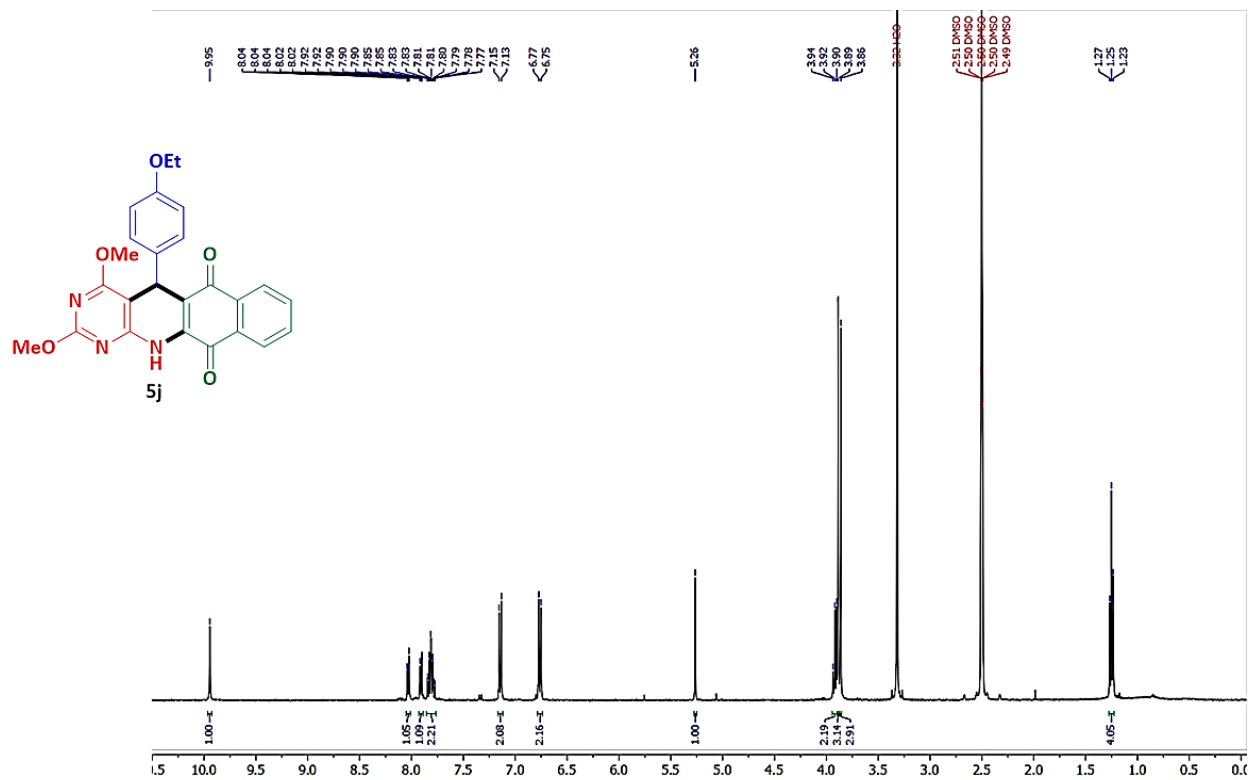

Figure S48:  $^{13}\text{C-NMR}$  (100 MHz,  $\text{DMSO-d}_6$ ) of Compound 5j.

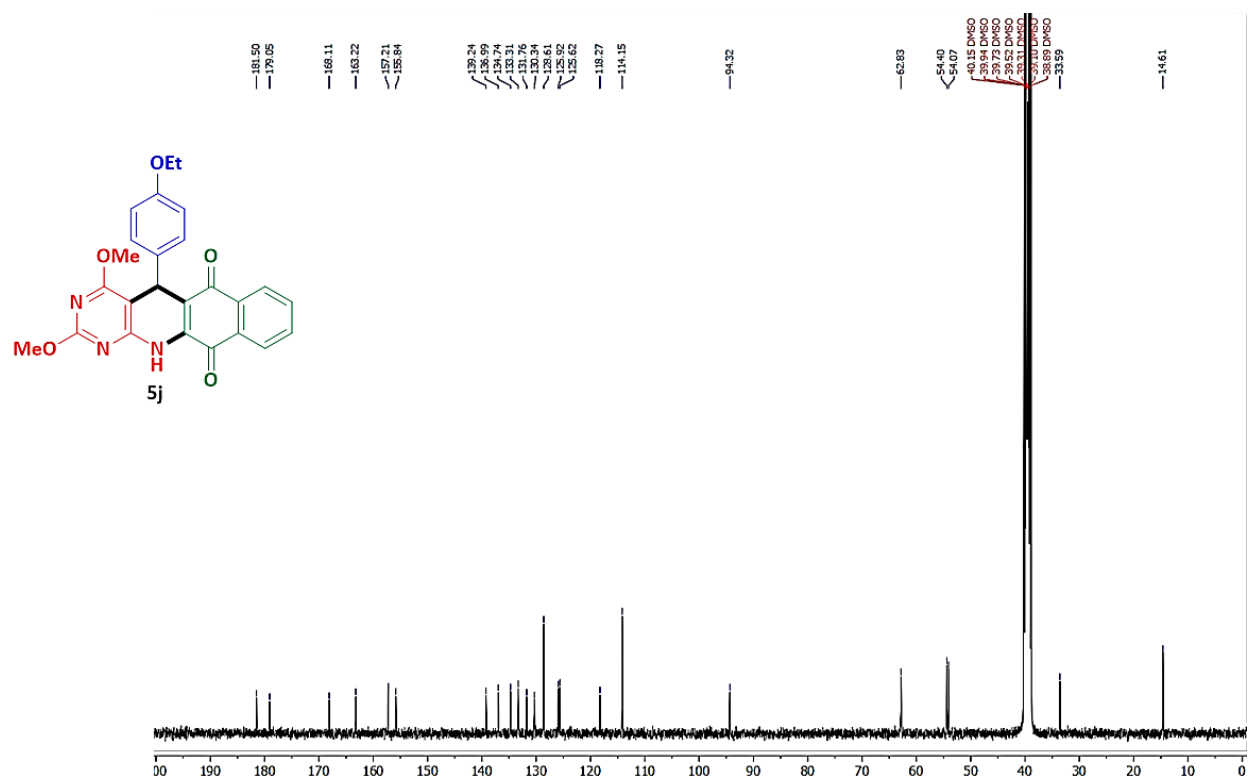

Figure S49:  $^1\text{H-NMR}$  (400 MHz,  $\text{DMSO-d}_6$ ) of Compound 6j.

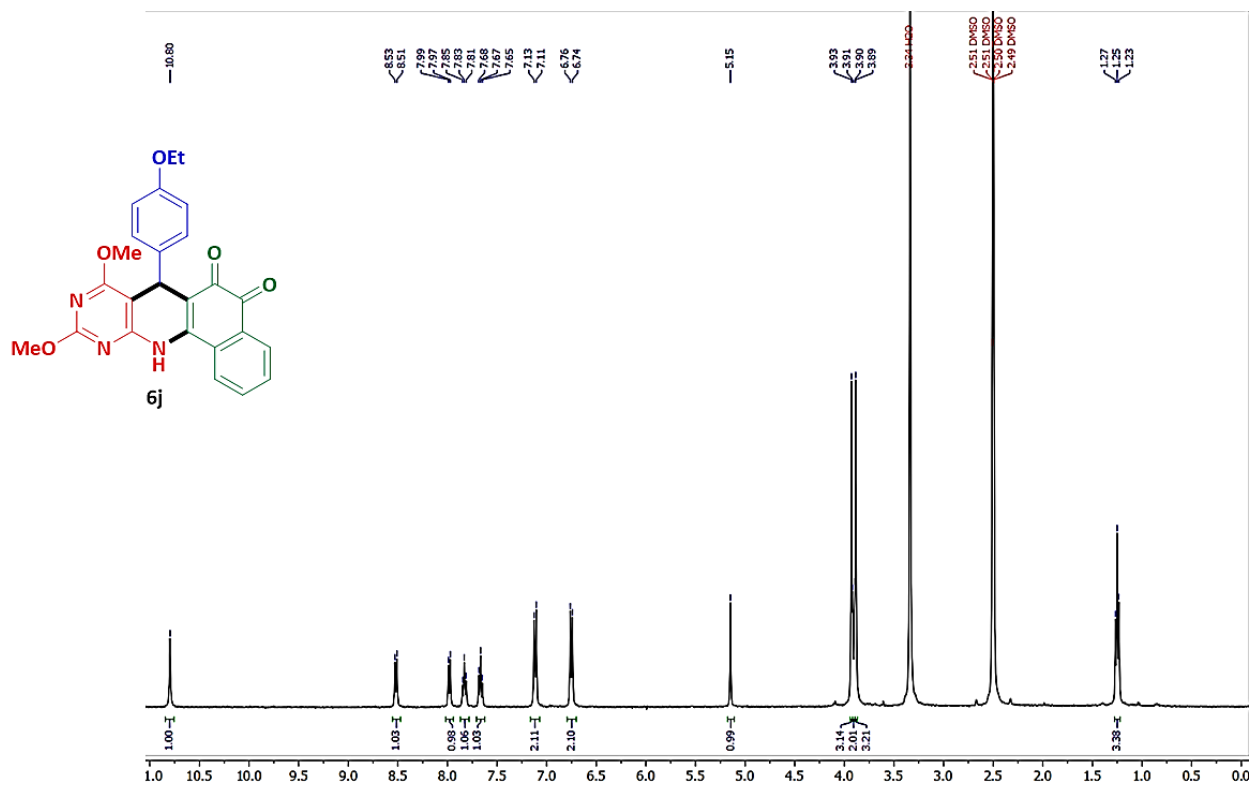

Figure S50:  $^{13}\text{C-NMR}$  (100 MHz,  $\text{DMSO-d}_6$ ) of Compound 6j.

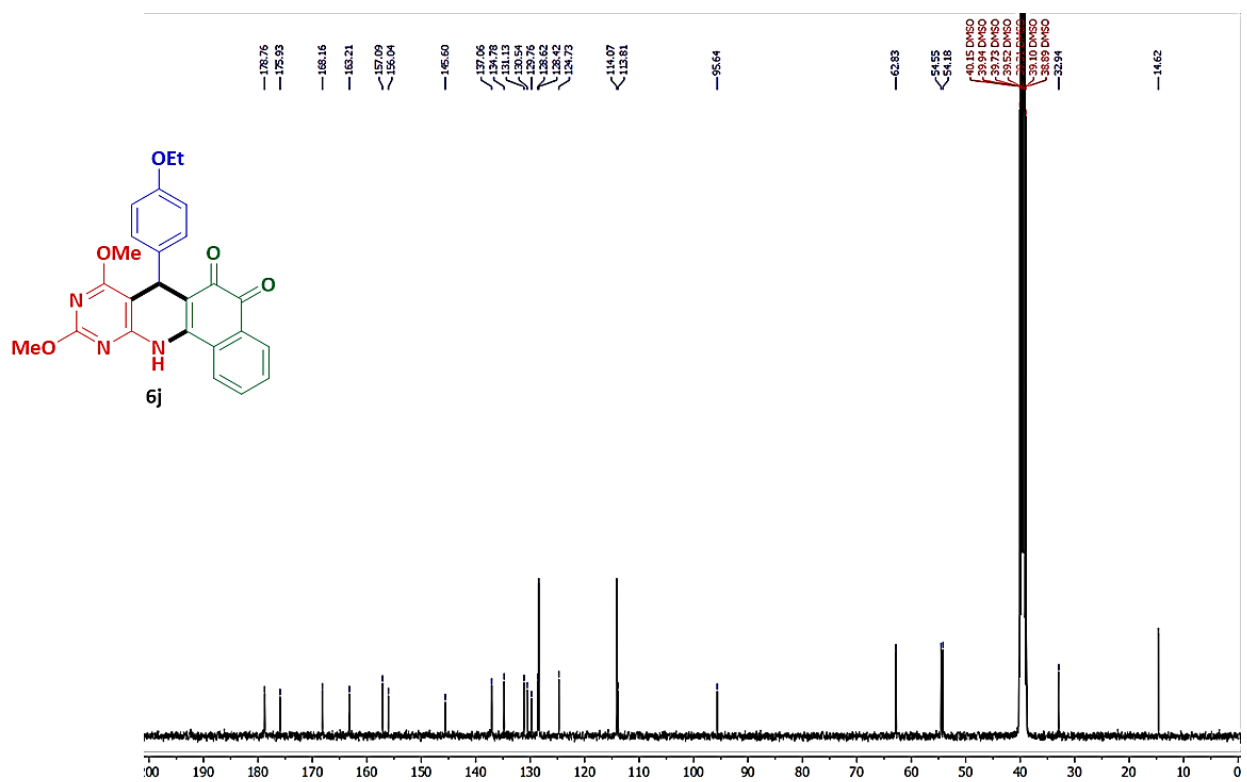

Figure S51: LCMS of Compound 5a and 6a.

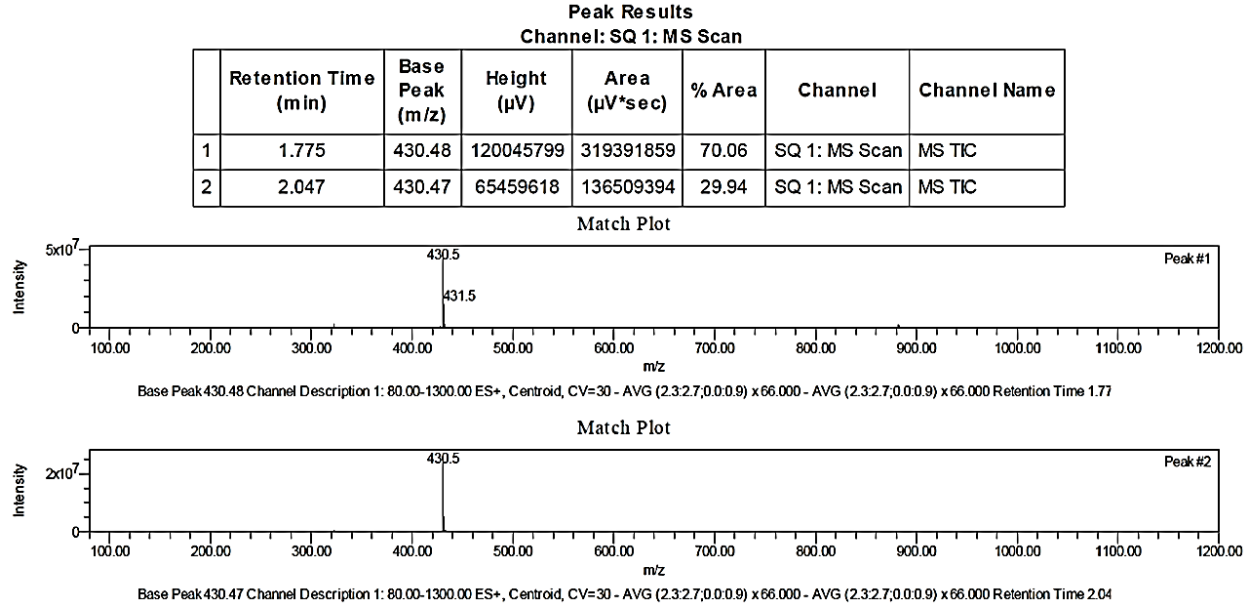

Figure S52: LCMS of Compound 5b and 6b.

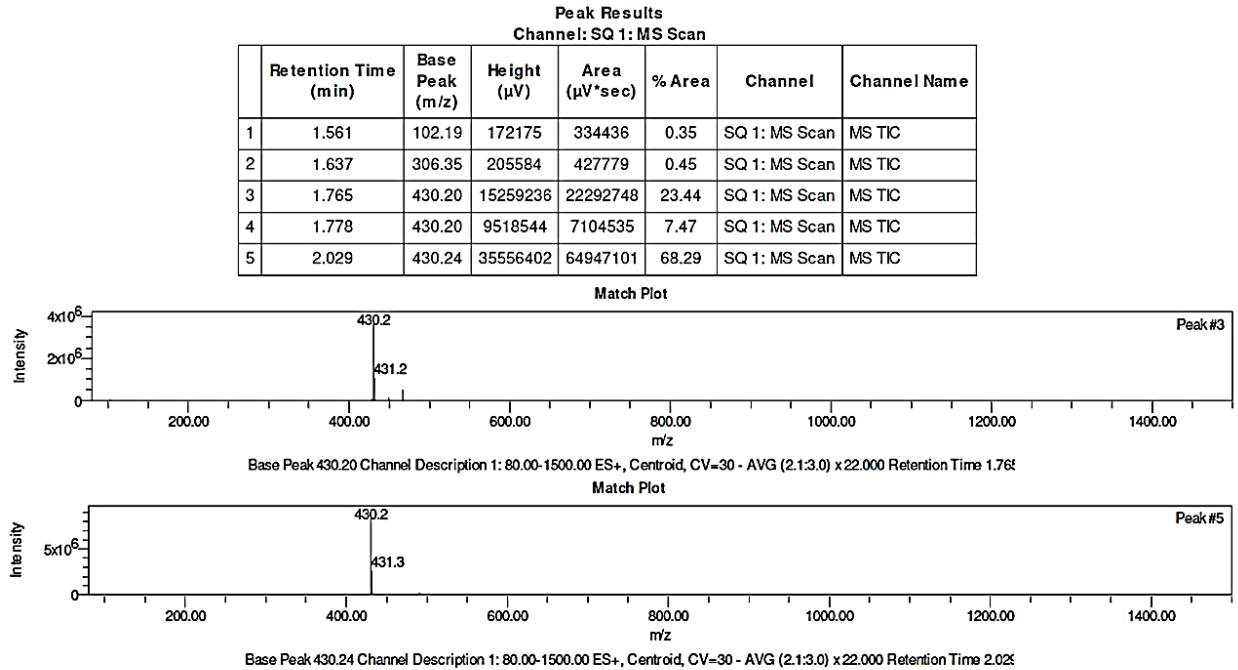

Figure S53: LCMS of Compound 5c and 6c.

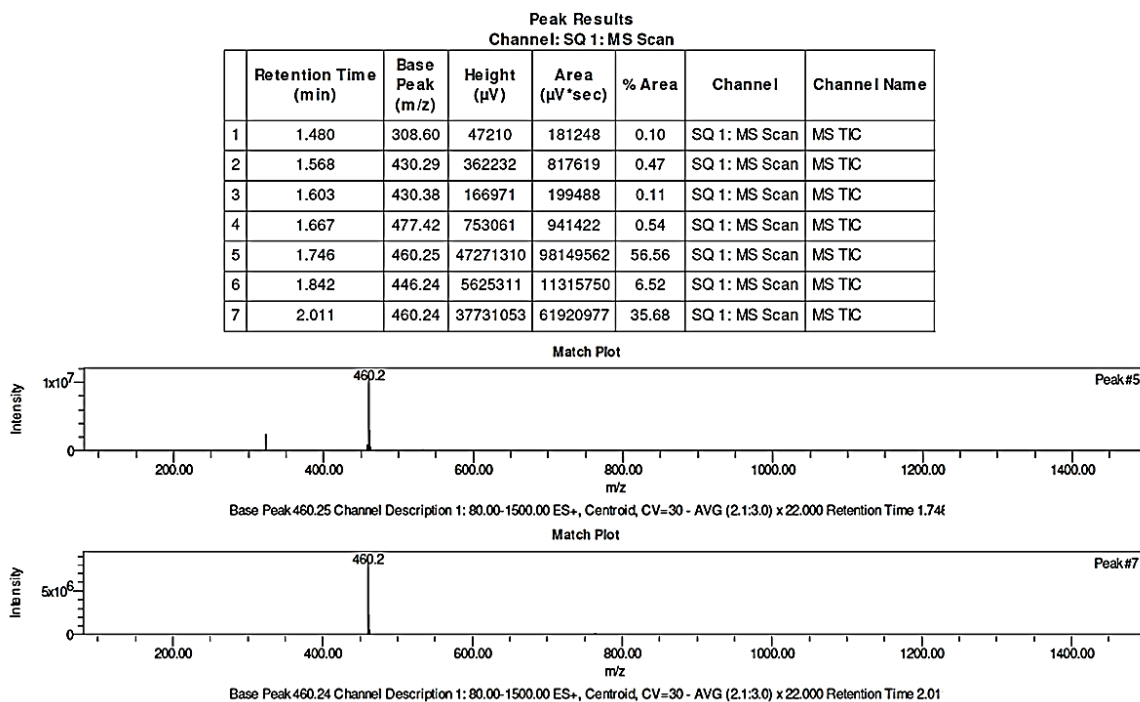

Figure S54: LCMS of Compound 5d and 6d.

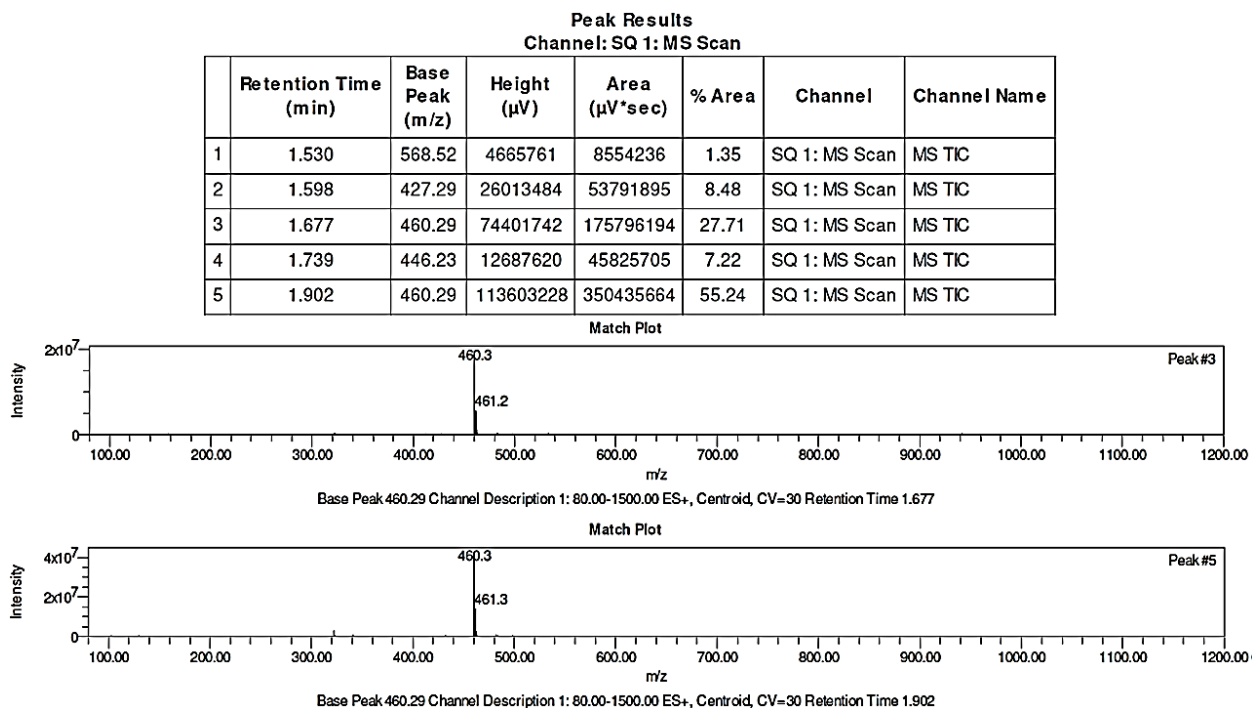

Figure S55: LCMS of Compound 5e and 6e.

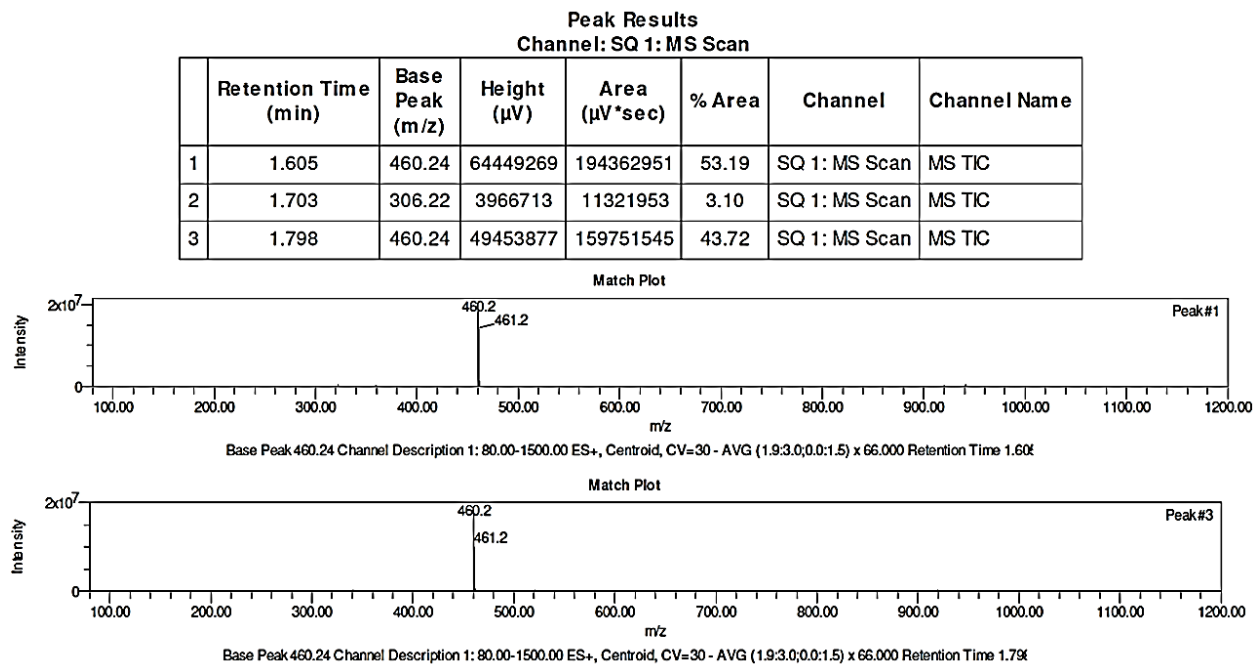

Figure S56: LCMS of Compound 5f and 6f.

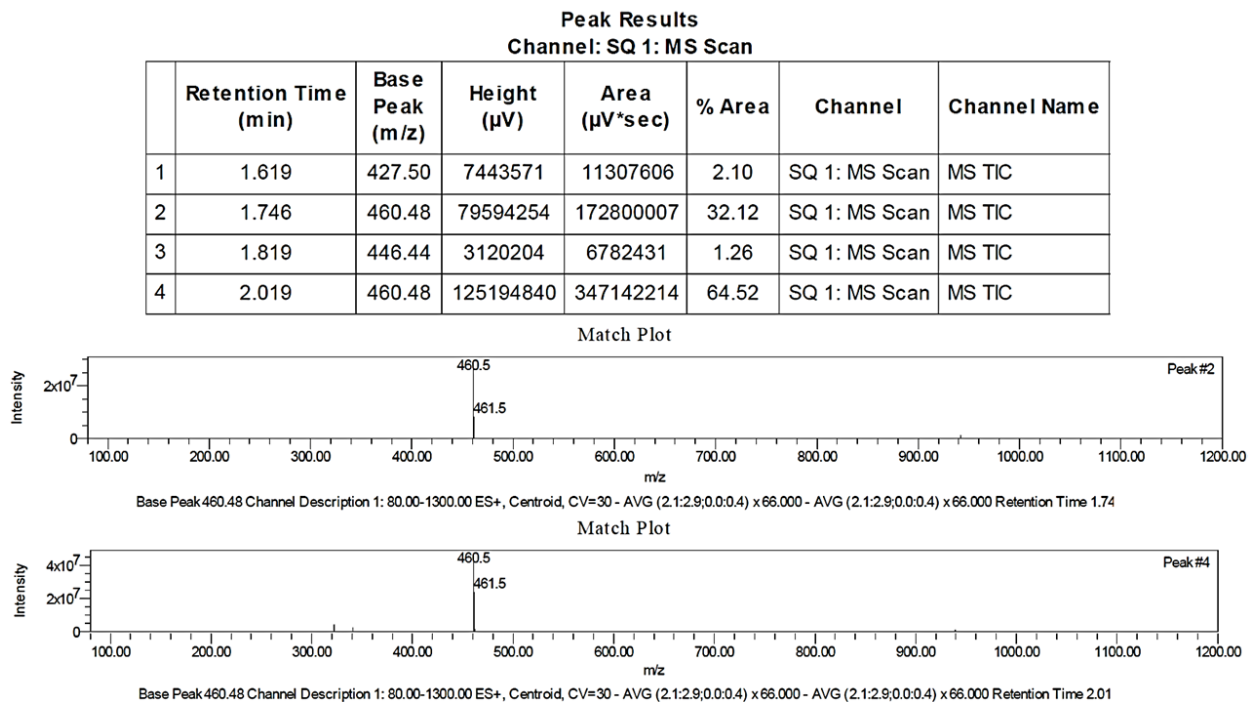



Figure S57: LCMS of Compound 5g and 6g.

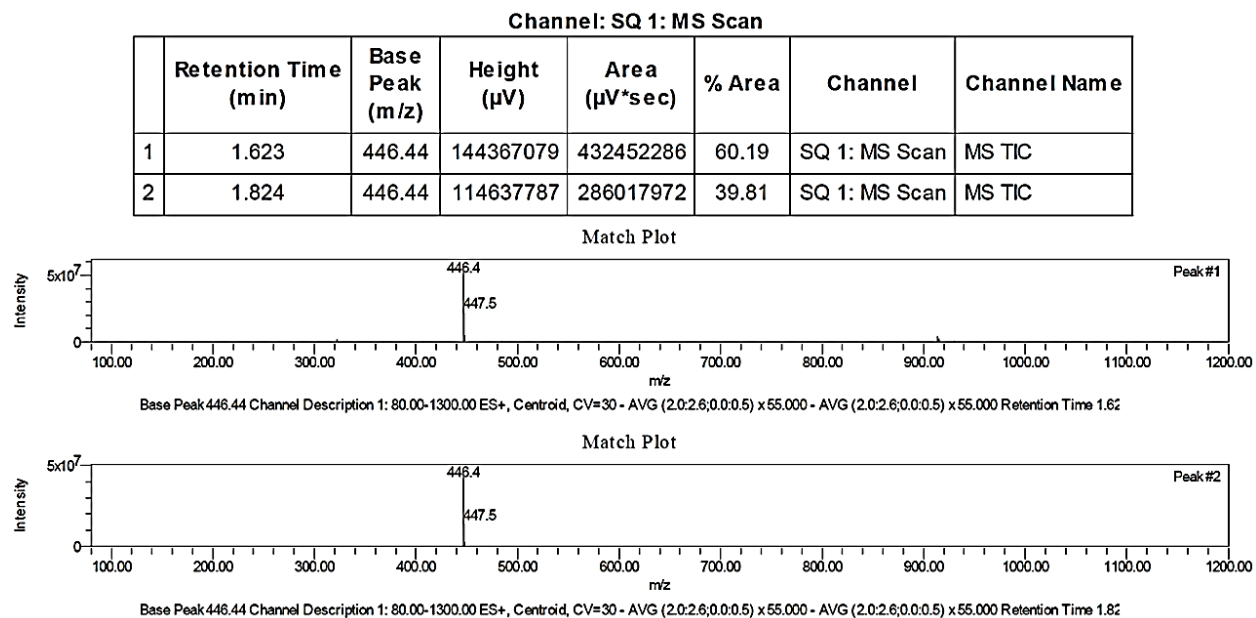

Figure S58: LCMS of Compound 5h and 6h.

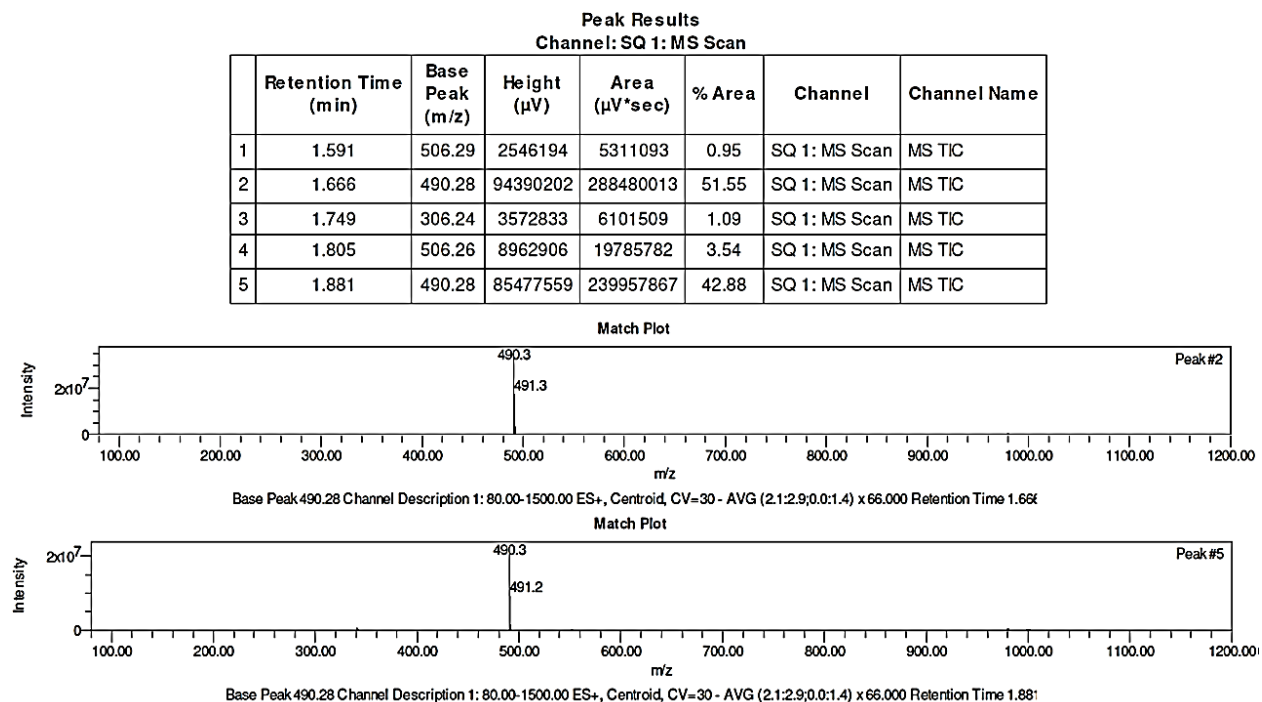

Figure S59: LCMS of Compound 5i and 6i.

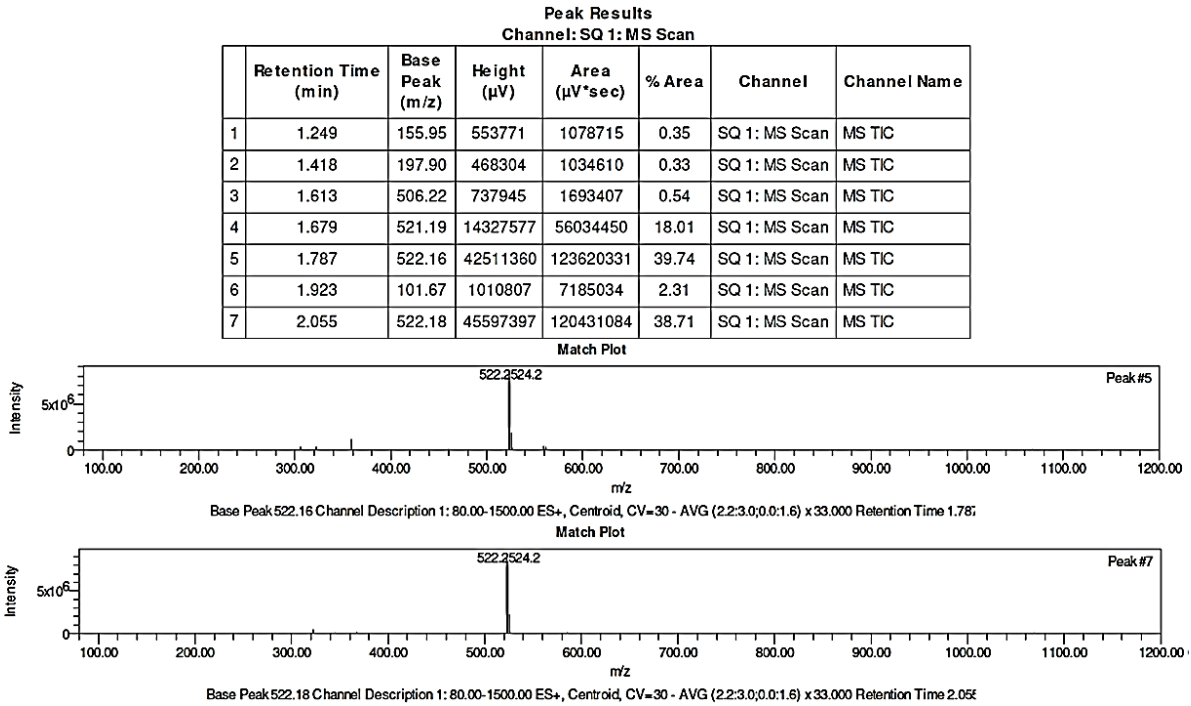

Figure S60: LCMS of Compound 5j and 6j.

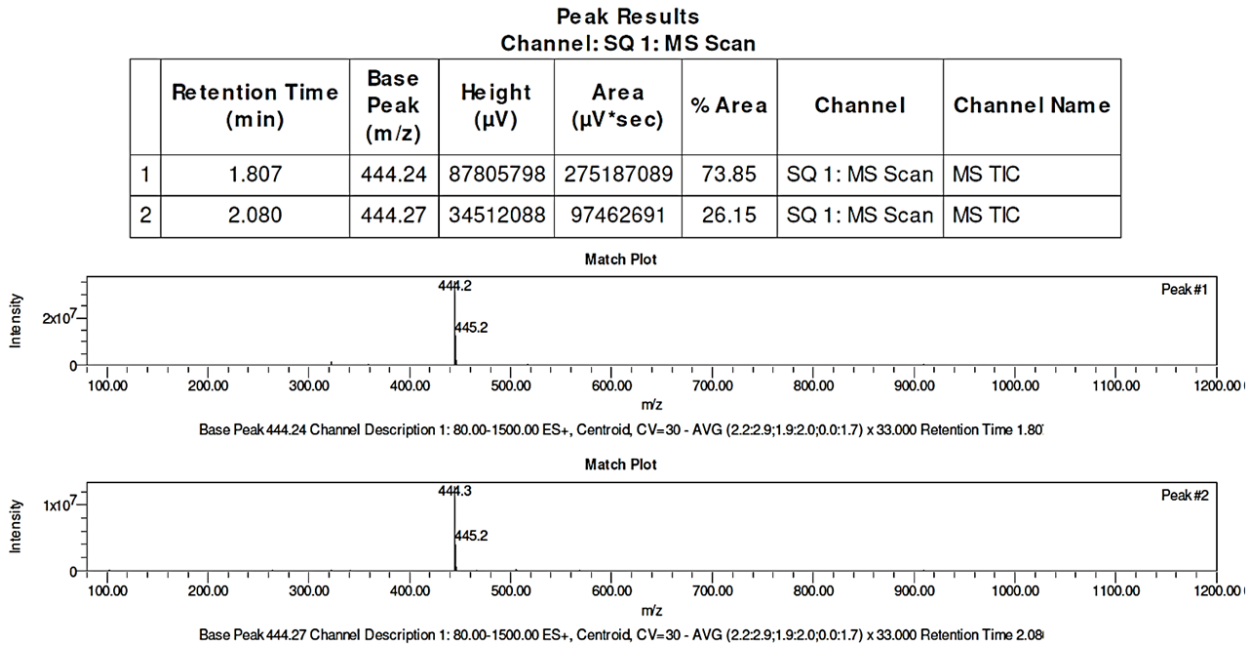

Figure S61: HRMS of Compound 5a.

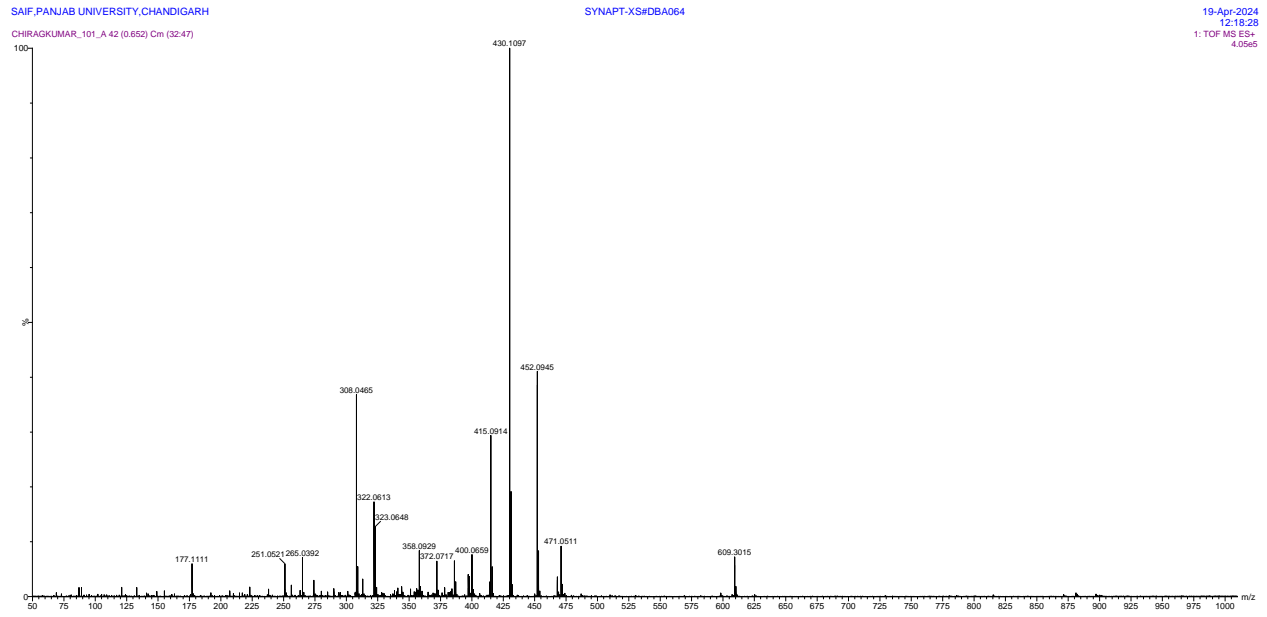

Figure S62: HRMS of Compound 6a.

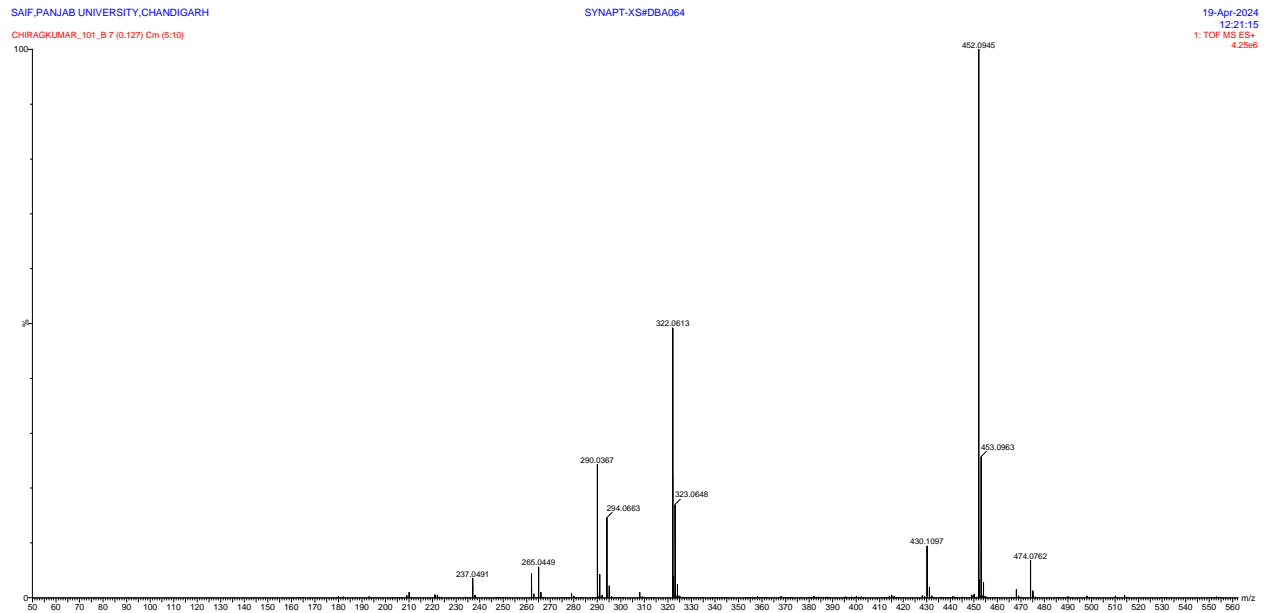

Figure S63: HRMS of Compound 5b.

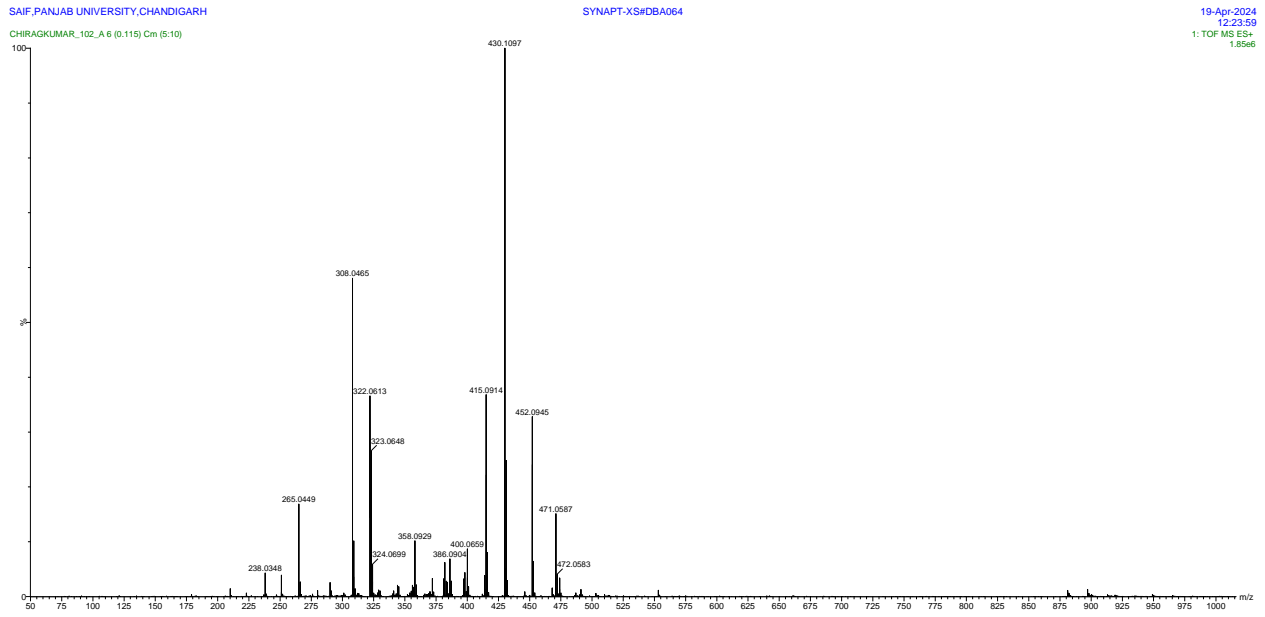

Figure S64: HRMS of Compound 6b.

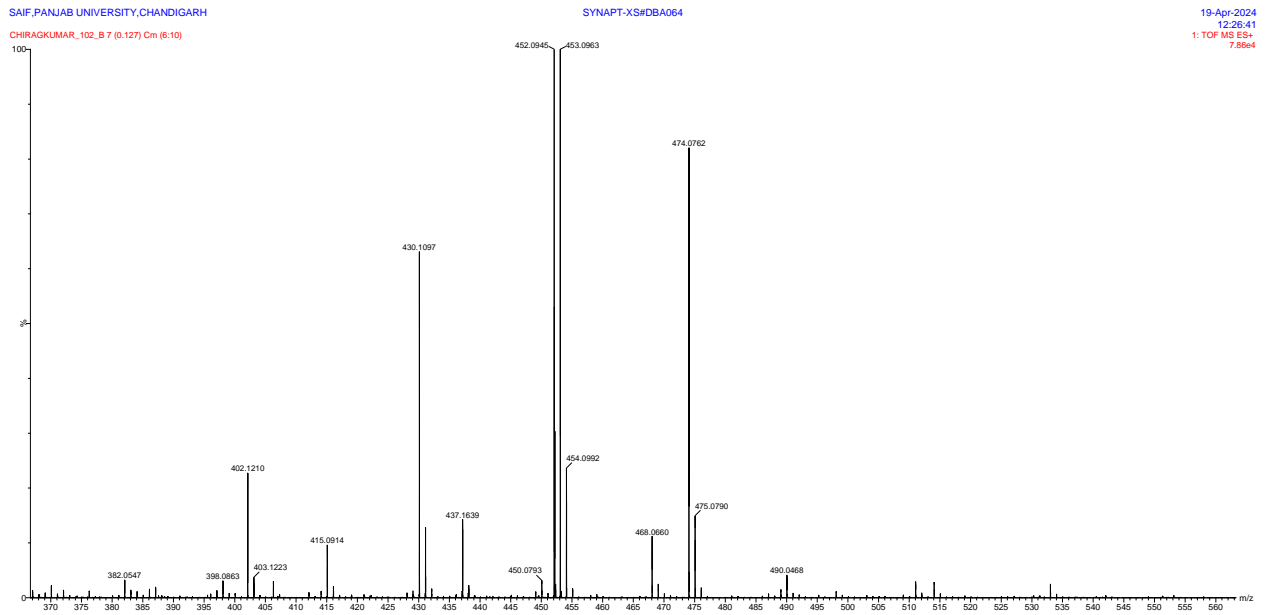

Figure S65: HRMS of Compound 5c.

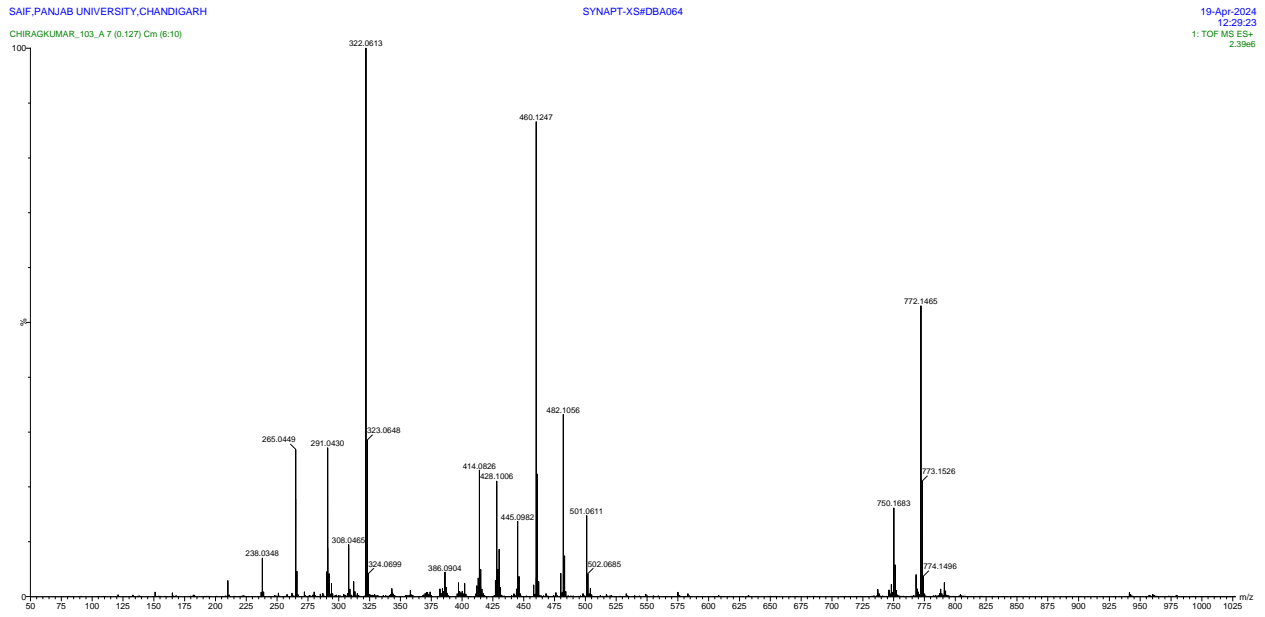

Figure S66: HRMS of Compound 6c.

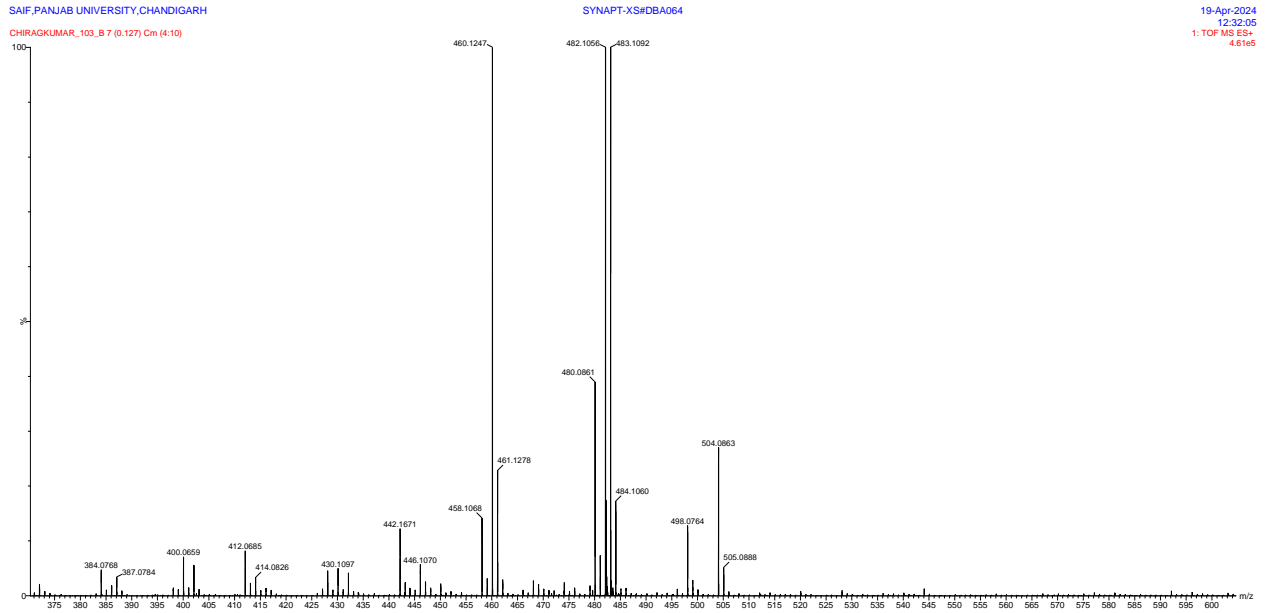

Figure S67: HRMS of Compound 5d.

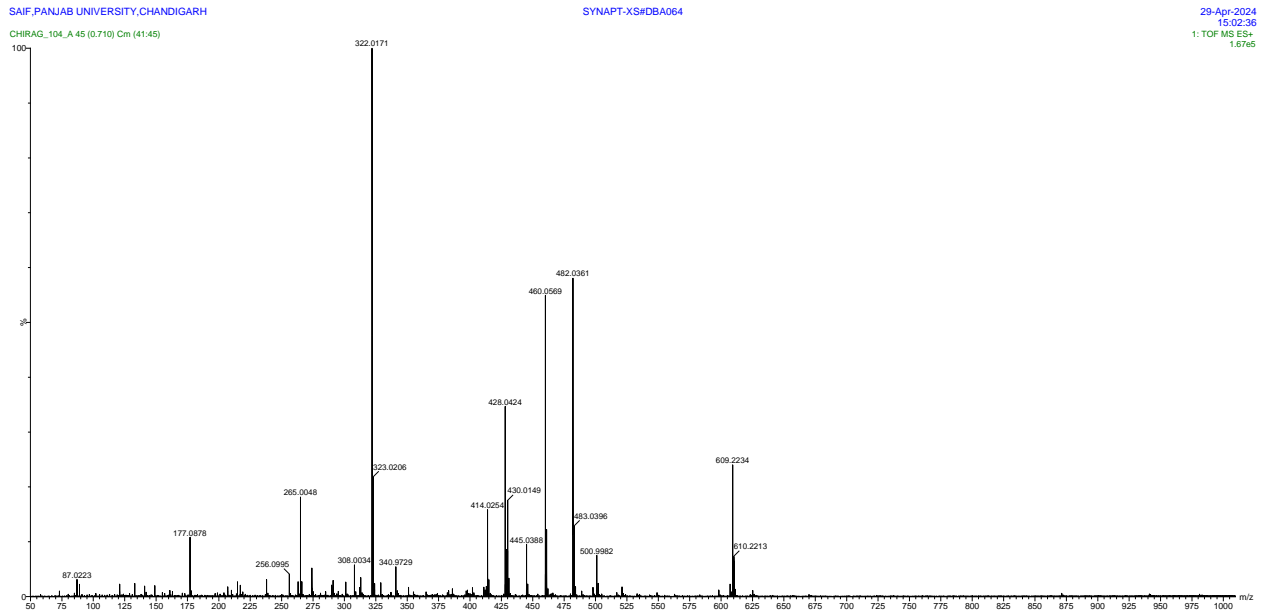

Figure S68: HRMS of Compound 6d.

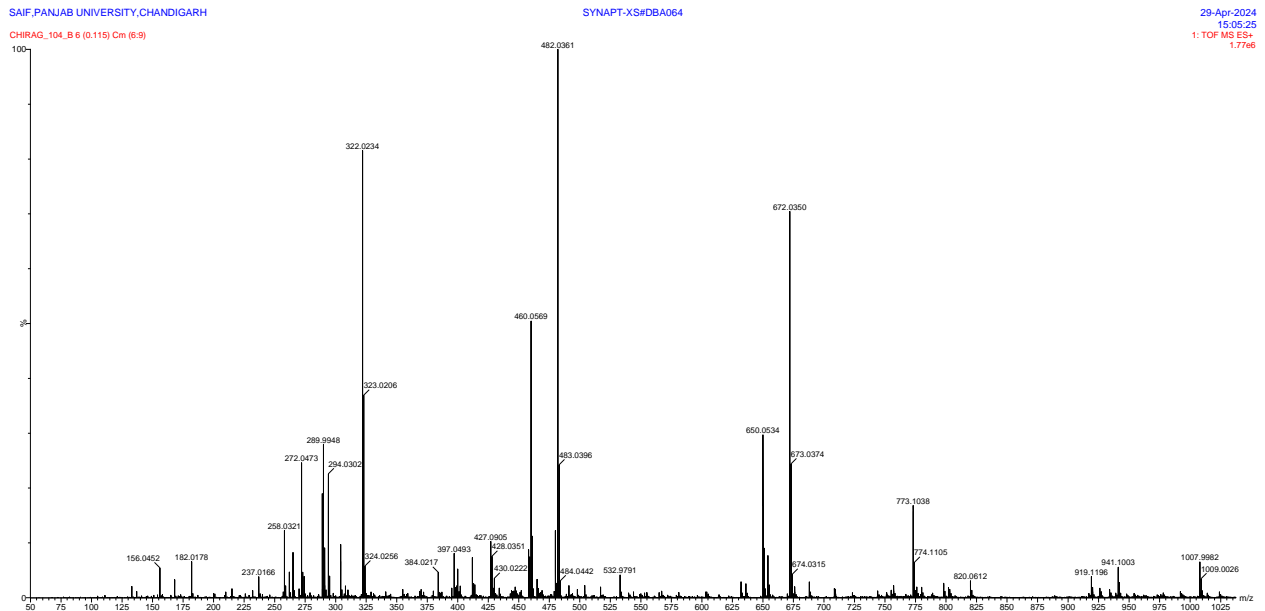

Figure S69: HRMS of Compound 5e.

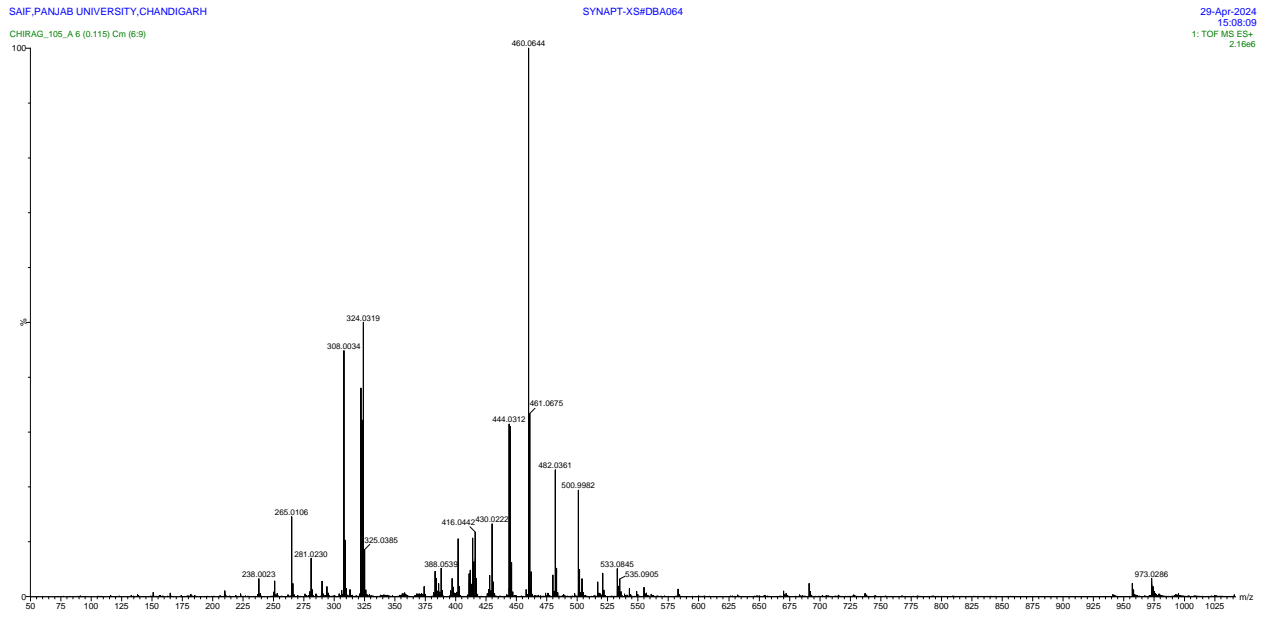

Figure S70: HRMS of Compound 6e.

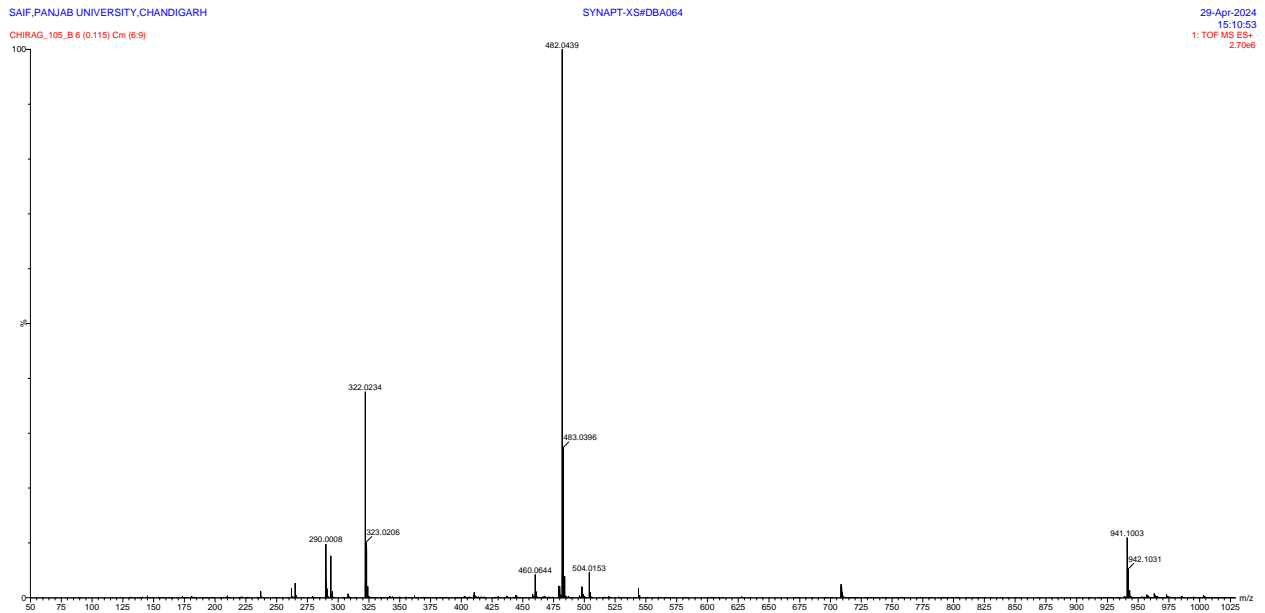

Figure S71: HRMS of Compound 5f.

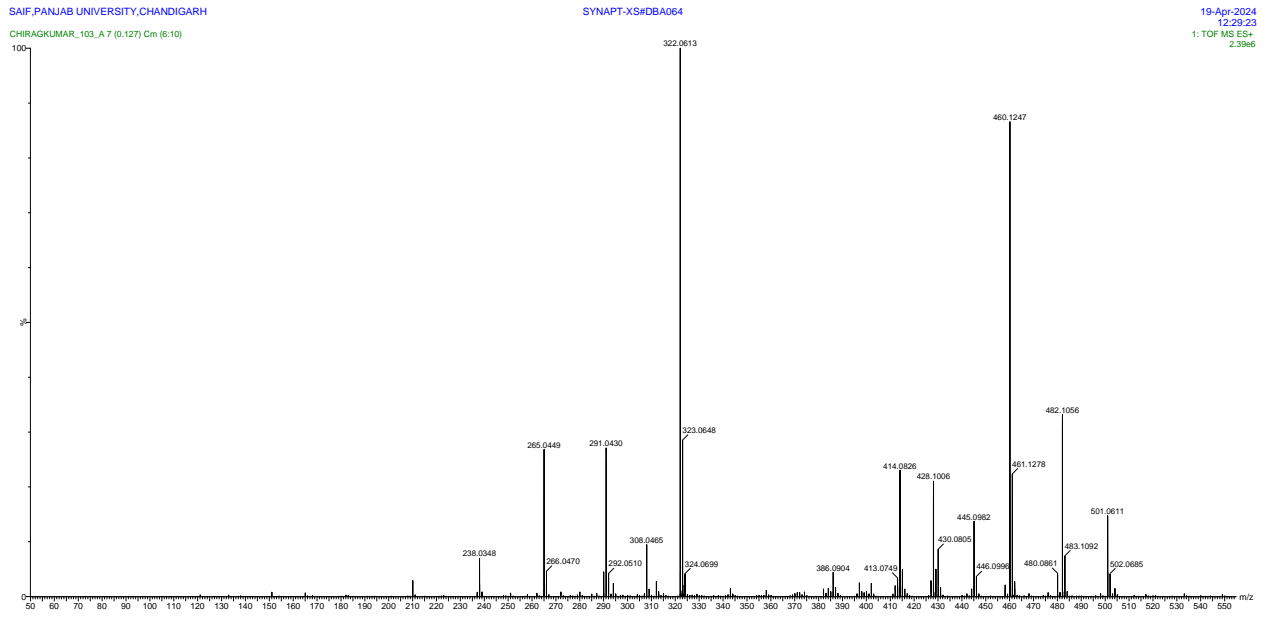

Figure S72: HRMS of Compound 6f.





Figure S73: HRMS of Compound 5g.

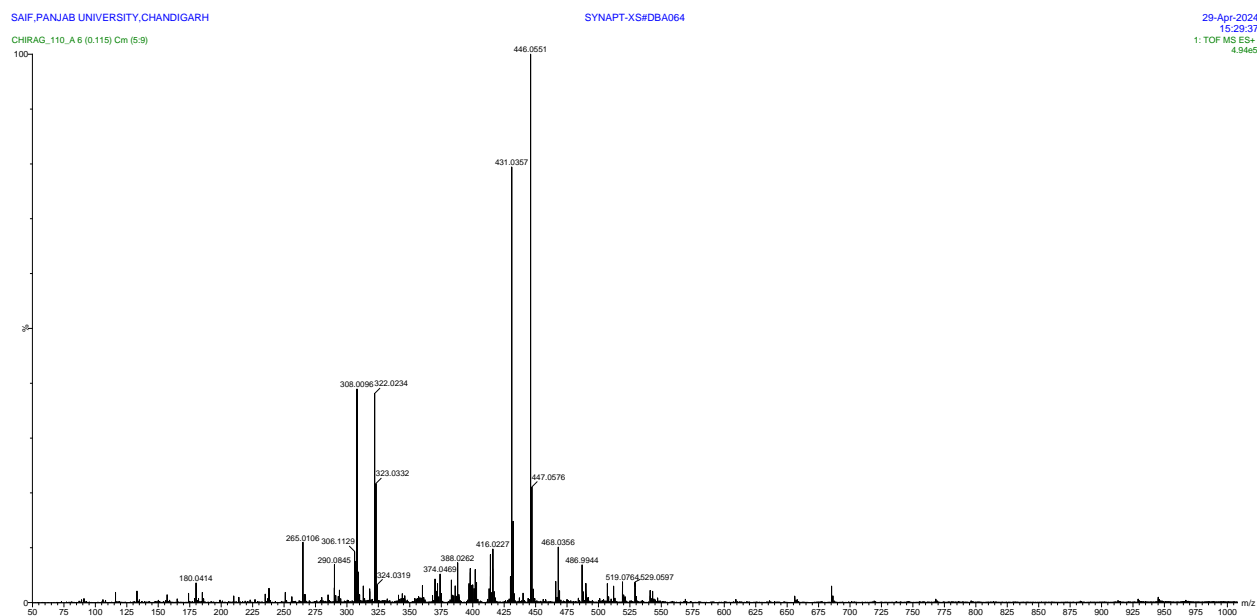

Figure S74: HRMS of Compound 6g.

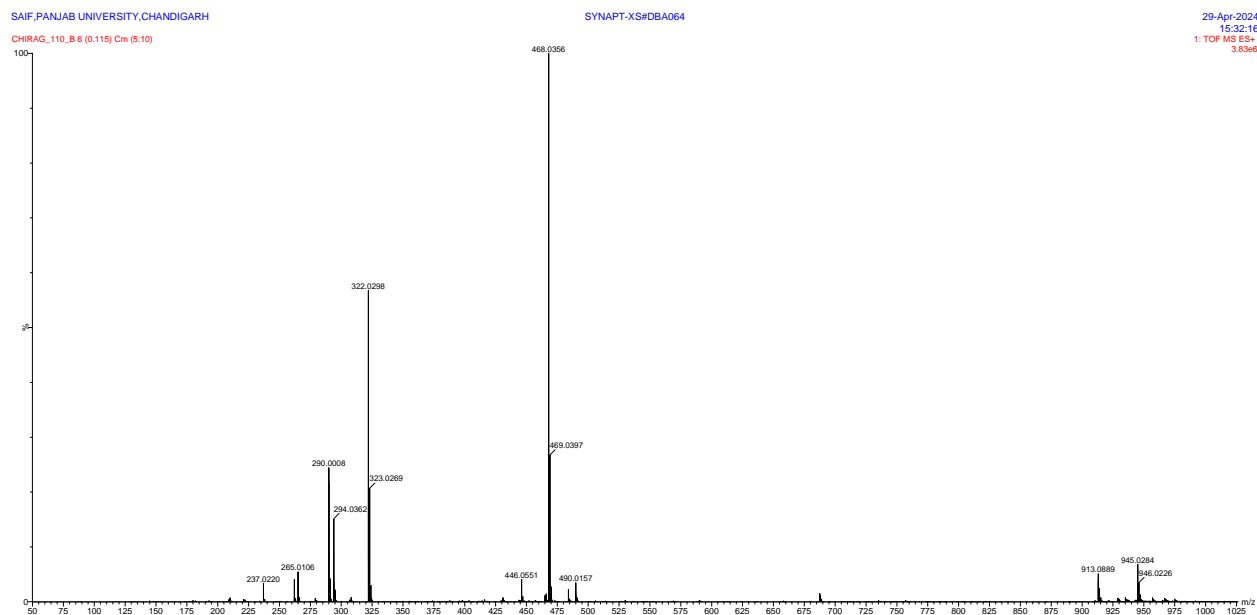

Figure S75: HRMS of Compound 5h.

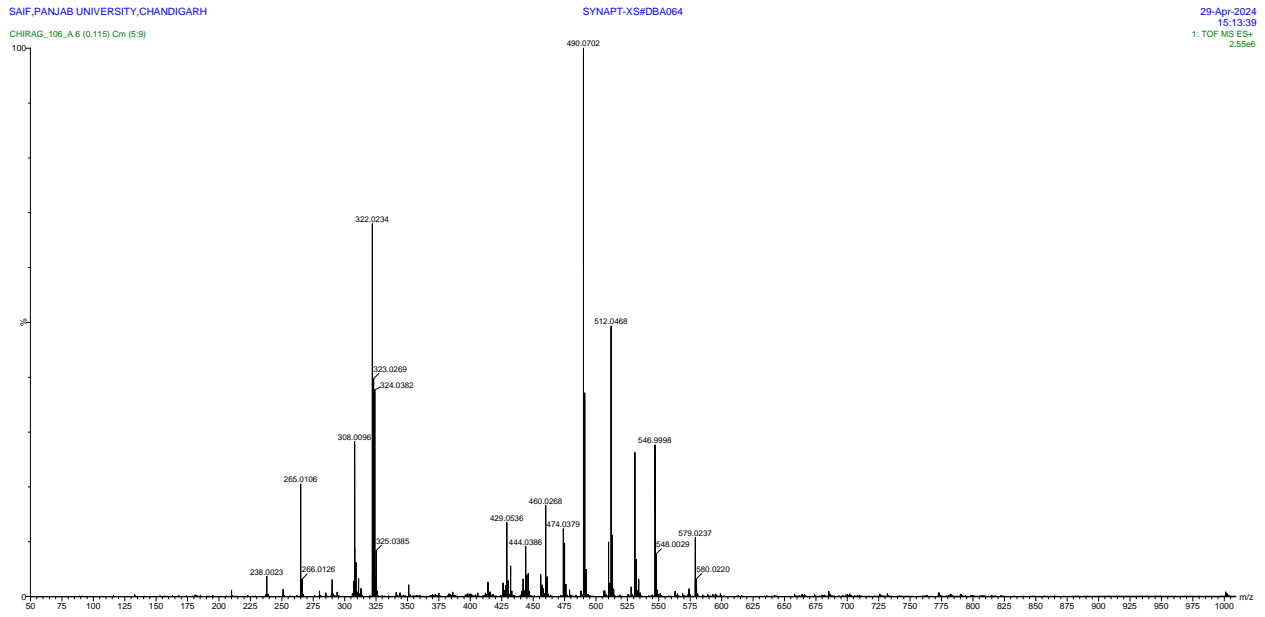

Figure S76: HRMS of Compound 6h.

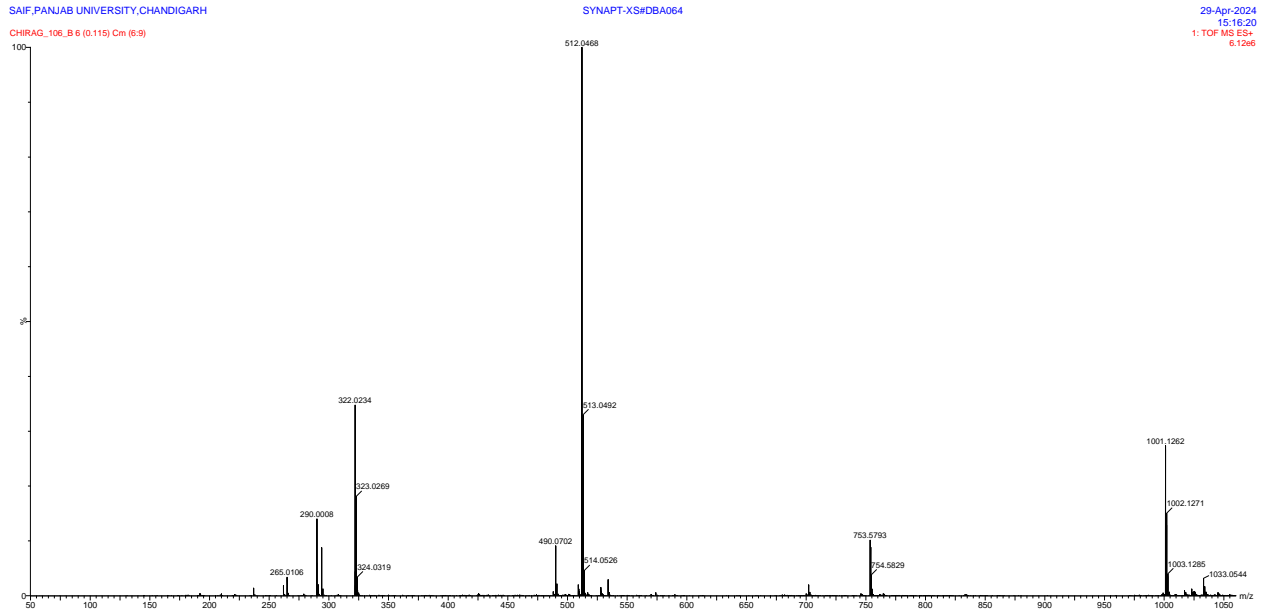

Figure S77: HRMS of Compound 5i.

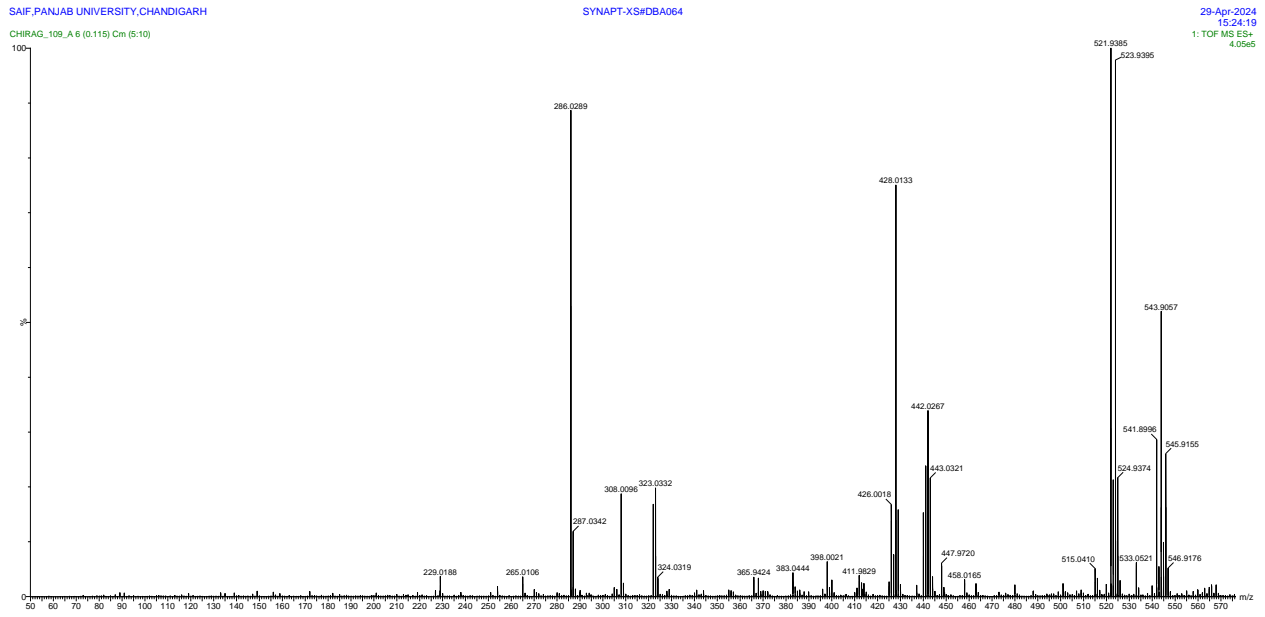

Figure S78: HRMS of Compound 6i.

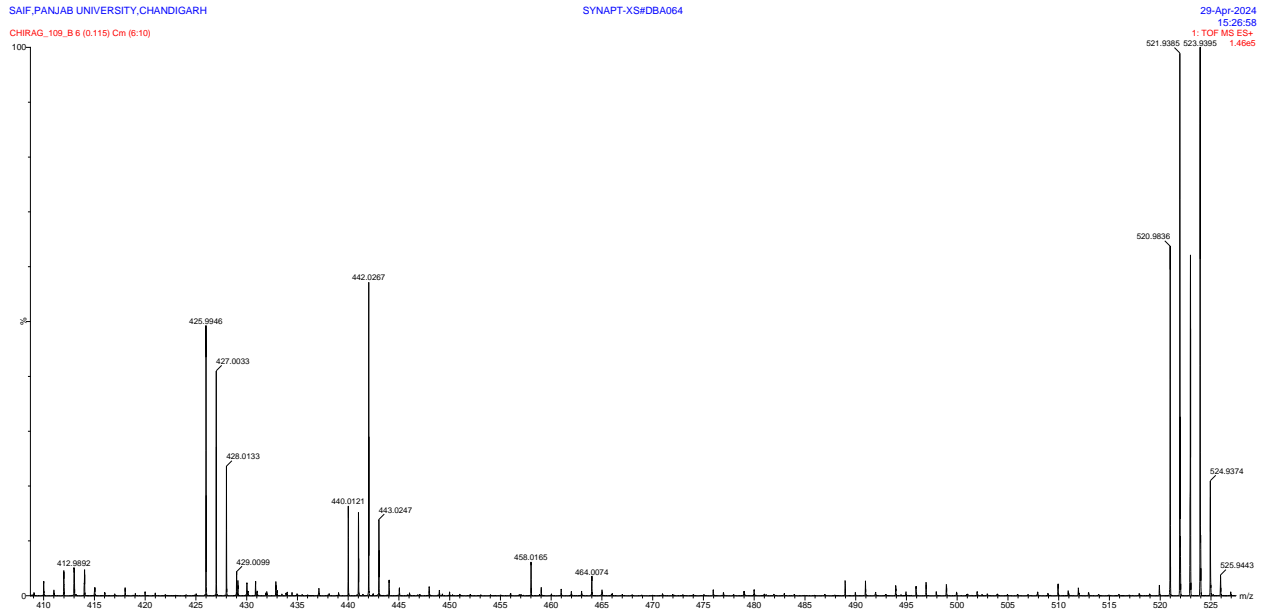

Figure S79: HRMS of Compound 5j.

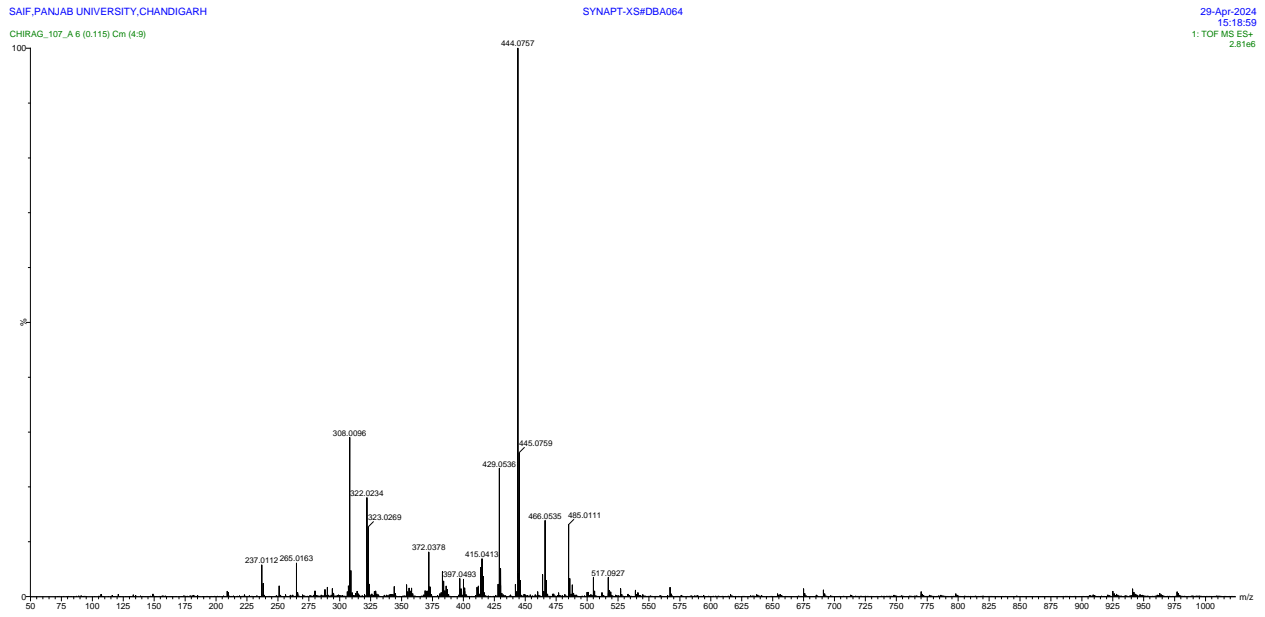

Figure S80: HRMS of Compound 6j.

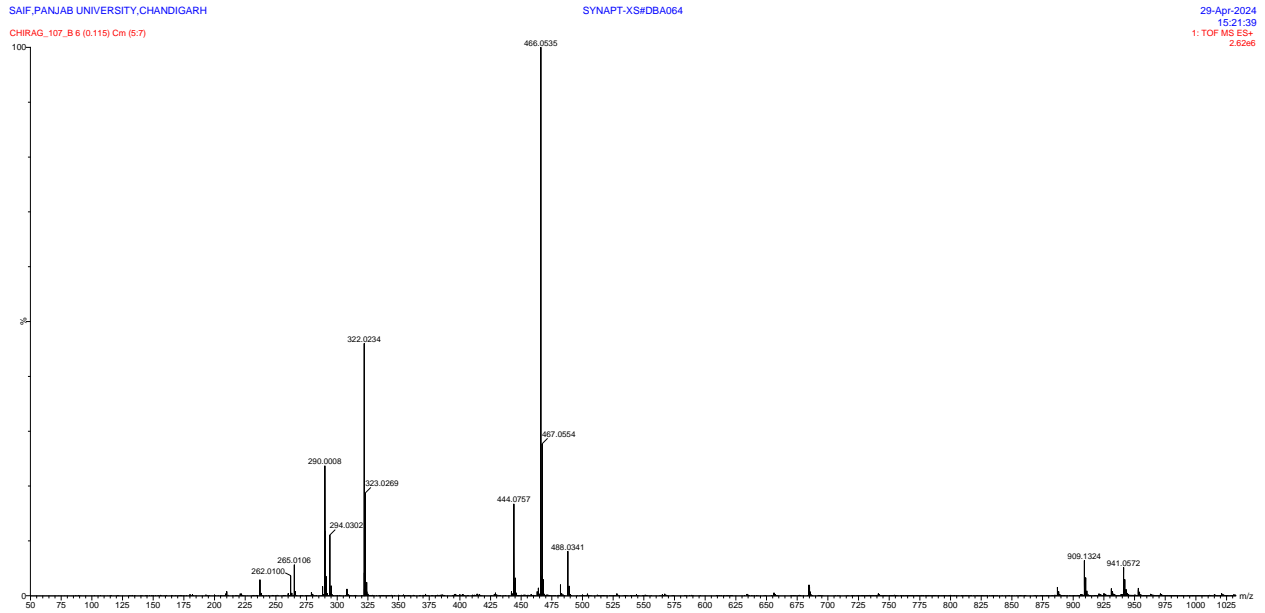

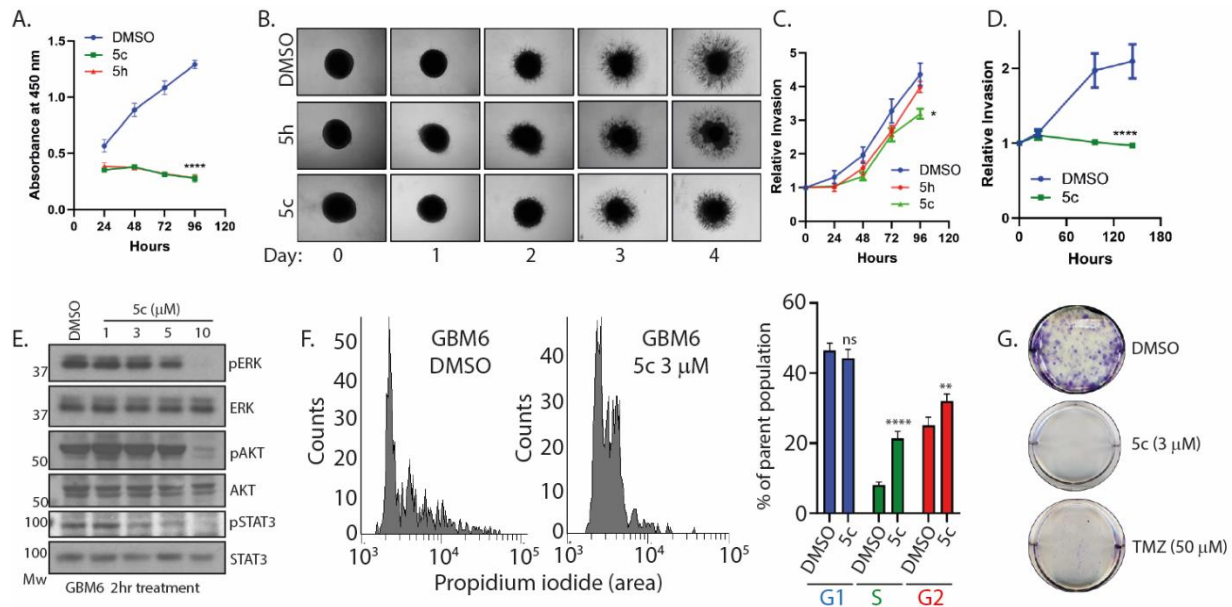

**Figure S81:** Effect of **5c** and **5h** compounds on proliferation and invasion in GBM cells: (A) GBM6 cell proliferation was measured over 5 days in the presence or absence of **5c** or **5h**. Error bar indicates standard error calculated from three independent experiments in triplicate; \*\*\*\* $p < 0.0001$ . (B) Panel of representative images of spheroids generated from GBM6 cells, invading basement membrane matrix post treatment with DMSO in control group and **5c** at 2.9  $\mu\text{M}$  concentration and **5h** at 3.3  $\mu\text{M}$  concentration in test groups, respectively. Photomicrographs of each spheroid was taken at x100 at different time points. (C) Relative invasion was calculated and quantified. (D) Quantification of invasion in DMSO treated control and **5c** at 5  $\mu\text{M}$  concentration at day 0 and day 6. Statistically significant difference is represented as \* $p < 0.05$ , and \*\*\*\* $p < 0.0001$ . (E) Western blot analysis was carried out with the indicated antibodies for GBM6 cell lysates treated with **5c** for the indicated concentrations for 2 hr. (F) Asynchronous GBM6 cells were treated with various doses of **5c** for 16 hours and the cell cycle distribution was analysed using propidium iodide and quantified using flow cytometry. Statistically significant difference is represented as \*\* $p < 0.01$ , and \*\*\*\* $p < 0.0001$  compared to DMSO-treated control cell population; two-way ANOVA with Sidak's multiple comparison; ns: not significant. (G) GBM143 colony formation assay with or without treatment with **5c** or temozolomide (TMZ) over 15 days.

## Abbreviations

|             |                                                      |
|-------------|------------------------------------------------------|
| <b>PQ</b>   | Pyrimido[4,5- <i>b</i> ]quinolinone                  |
| <b>DHPQ</b> | Dihydropyrimido[4,5- <i>b</i> ]quinolinone           |
| <b>TLC</b>  | Thin Layer Chromatography                            |
| <b>LCMS</b> | Liquid Chromatography Mass Spectrometry              |
| <b>HRMS</b> | High-Resolution Mass Spectrometry                    |
| <b>NMR</b>  | Nuclear Magnetic Resonance                           |
| <b>DEPT</b> | Distortionless Enhancement by Polarization Transfer  |
| <b>HSQC</b> | Heteronuclear Single Quantum Coherence Spectroscopy  |
| <b>HMBC</b> | Heteronuclear Multiple Bond Correlation Spectroscopy |
| <b>Ar</b>   | Aromatic                                             |
| <b>DMSO</b> | Dimethyl Sulphoxide                                  |
| <b>TMZ</b>  | Temozolomide                                         |

## Acknowledgements

All authors are grateful to the Department of Chemistry, Sardar Patel University for providing lab facilities. SGP is grateful to the UGC, New Delhi for a UGC-JRF (NTA Ref. No.: 201610157514; dated: 01.04.2021). MPP and DPV are thankful to the Knowledge Consortium of Gujarat (KCG) for SHODH Fellowship (Reference No. 2021016434 and 2021016429, respectively). CDP is thankful to National Fellowship for Scheduled Tribe (Award No. 202223-NFST-GUJ-00003). SSB is thankful to CSIR, New Delhi, for a CSIR-JRF (Reference No. Nov/06/2020(i)EU-V). SB is funded by United Kingdom Research and Innovation Future Leader Fellowship MR/W008114/1.

## Reference :

1. S. Banerjee, C. Ji, J. E. Mayfield, A. Goel, J. Xiao, J. E. Dixon and X. Guo, *Proc Natl Acad Sci U S A*, 2018, **115**, 8155-8160.
2. S. Banerjee, S. J. Buhrlage, H.-T. Huang, X. Deng, W. Zhou, J. Wang, R. Traynor, A. R. Prescott, D. R. Alessi and N. S. Gray, *Biochemical Journal*, 2014, **457**, 215-225.
3. S. Banerjee, A. Zagorska, M. Deak, D. G. Campbell, A. R. Prescott and D. R. Alessi, *Biochemical Journal*, 2014, **461**, 233-245.
4. A. Keenlyside, T. Marples, Z. Gao, H. Hu, L. G. Nicely, J. Nogales, H. Li, L. Landgraf, A. Solth, A. Melzer, K. Hossain-Ibrahim, Z. Huang, S. Banerjee and J. Joseph, *Scientific Reports*, 2023, **13**, 20215.
5. L. G. Nicely, R. M. Vala, D. B. Upadhyay, J. Nogales, C. Chi, S. Banerjee and H. M. Patel, *RSC Adv*, 2022, **12**, 23889-23897.

6. R. M. Vala, V. Tandon, L. G. Nicely, L. Guo, Y. Gu, S. Banerjee and H. M. Patel, *Ann Med*, 2022, **54**, 2549-2561.
7. V. Tandon, R. Moreno, K. Allmeroth, J. Quinn, S. E. Wiley, L. G. Nicely, M. S. Denzel, J. Edwards, L. de la Vega and S. Banerjee, *Biosci Rep*, 2023, **43**.
8. V. Tandon, Raturajsinh M. Vala, A. Chen, Robert L. Sah, Hitendra M. Patel, Michael C. Pirrung and S. Banerjee, *Bioscience Reports*, 2022, **42**, BSR20212721.
9. S. Banerjee, T. Wei, J. Wang, J. J. Lee, H. L. Gutierrez, O. Chapman, S. E. Wiley, J. E. Mayfield, V. Tandon, E. F. Juarez, L. Chavez, R. Liang, R. L. Sah, C. Costello, J. P. Mesirov, L. de la Vega, K. L. Cooper, J. E. Dixon, J. Xiao and X. Lei, *Proc Natl Acad Sci U S A*, 2019, **116**, 24881-24891.
10. I. Sharma, A. Singh, F. Siraj and S. Saxena, *Journal of Biomedical Science*, 2018, **25**, 62.
